# Supplementary figures and images for: Sink/Source Balance of Leaves Influences Amino Acid Pools and Their Associated Metabolic Fluxes in Winter Oilseed Rape (Brassica napus L.) (part 1 of 2)
Source: MDPI journal article supplement (doi:10.3390/metabo10040150), 2020-04-13

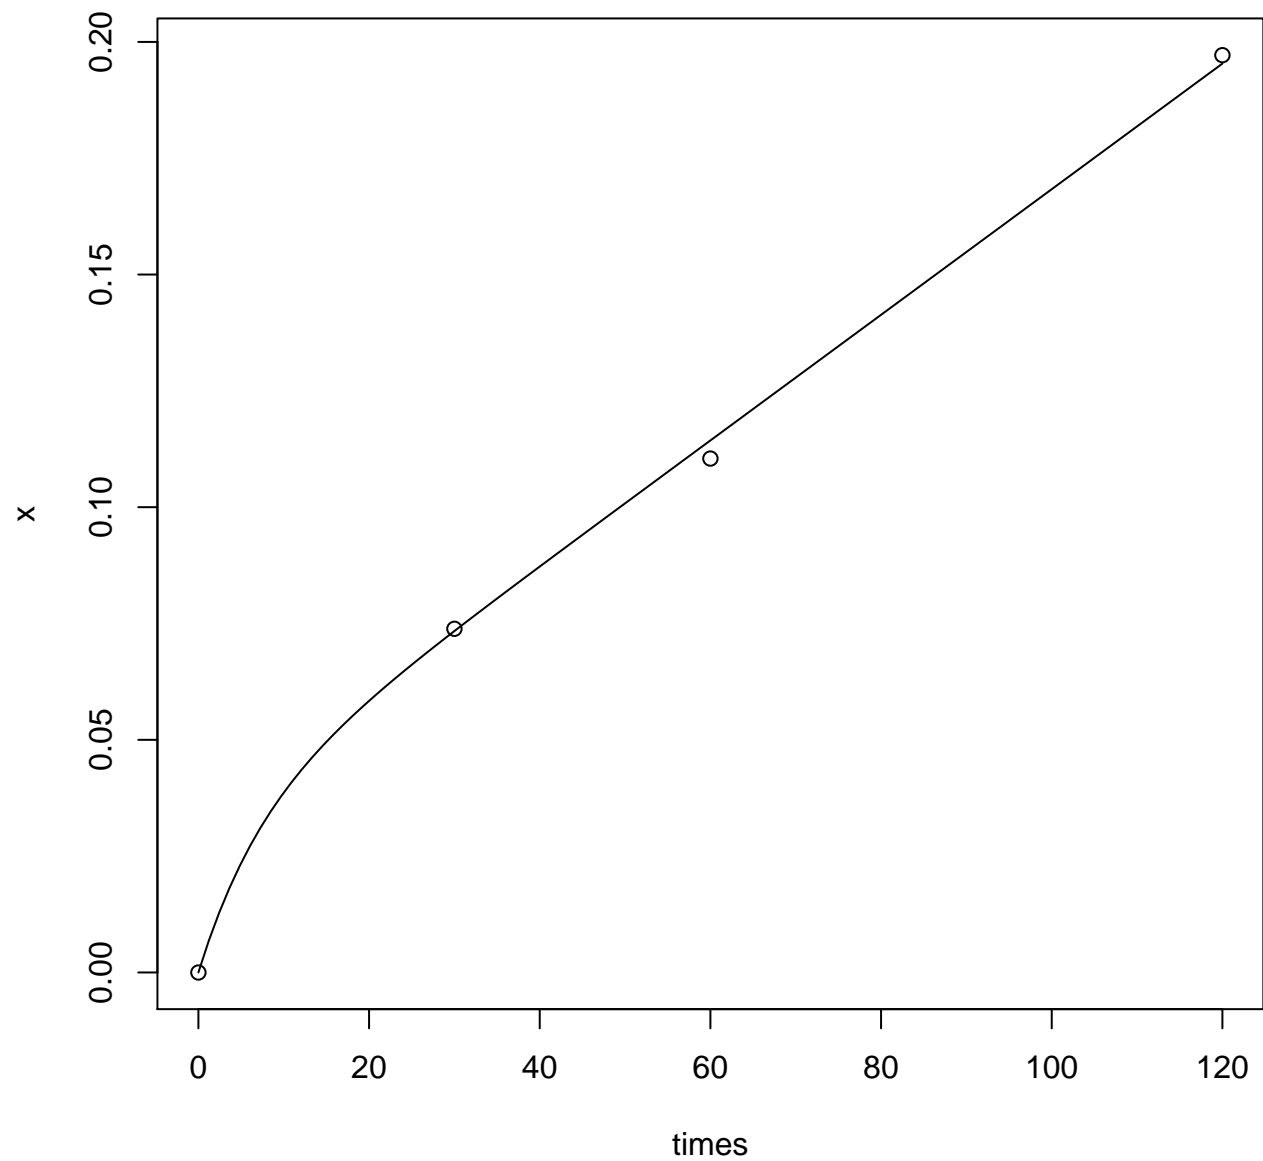

Supplement: s1 [file s1]

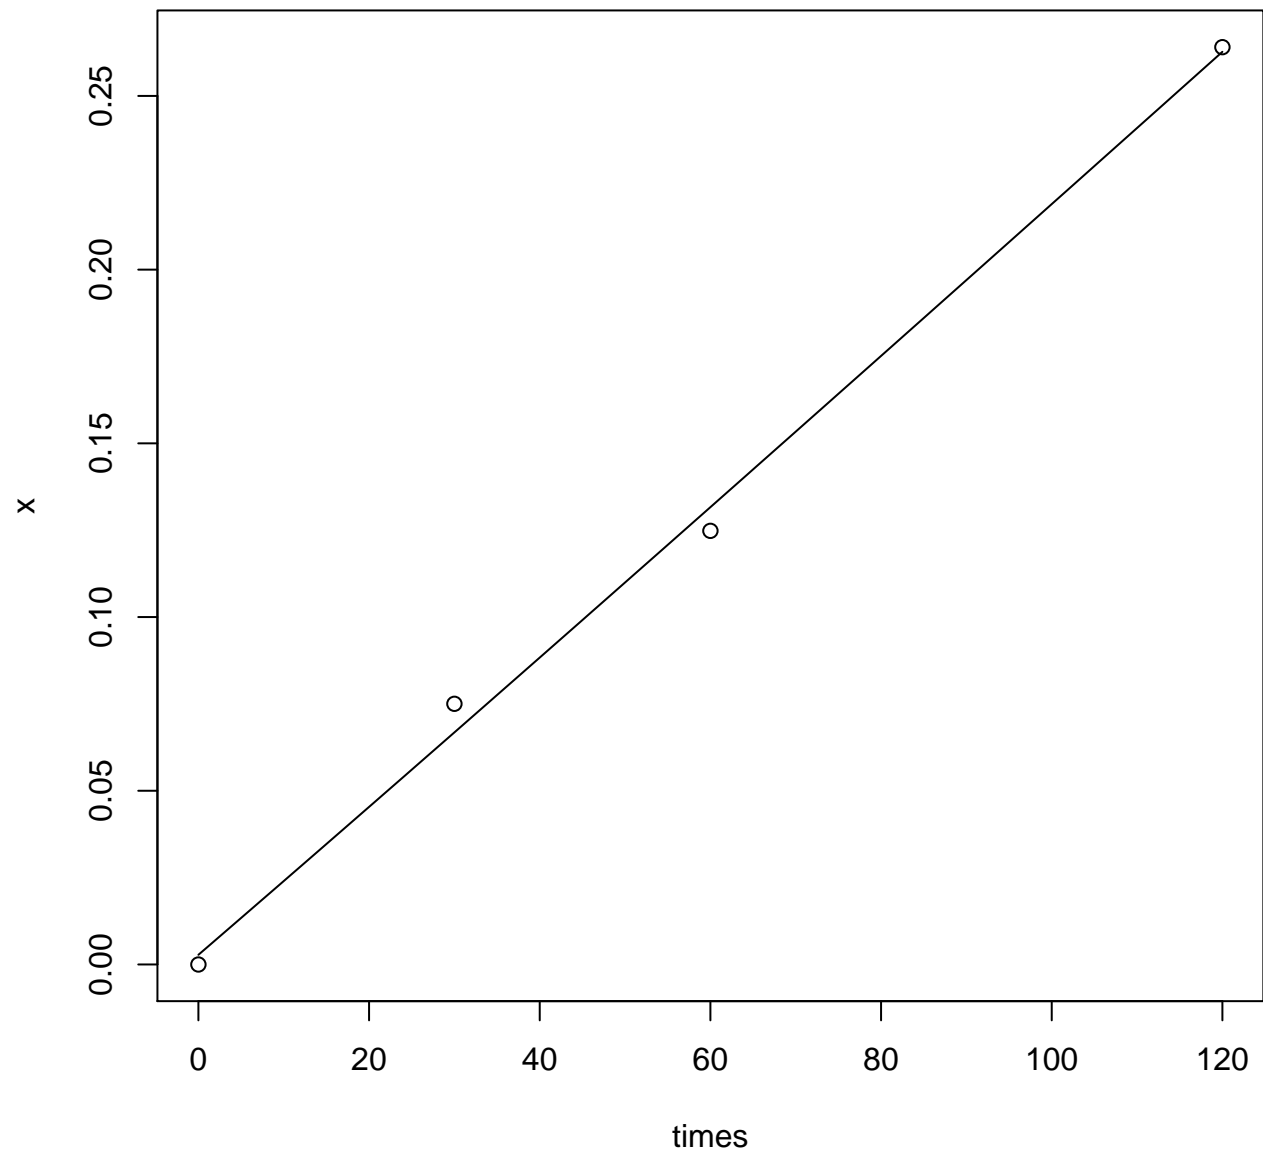

Supplement: s1 [file s1]

## fitting results

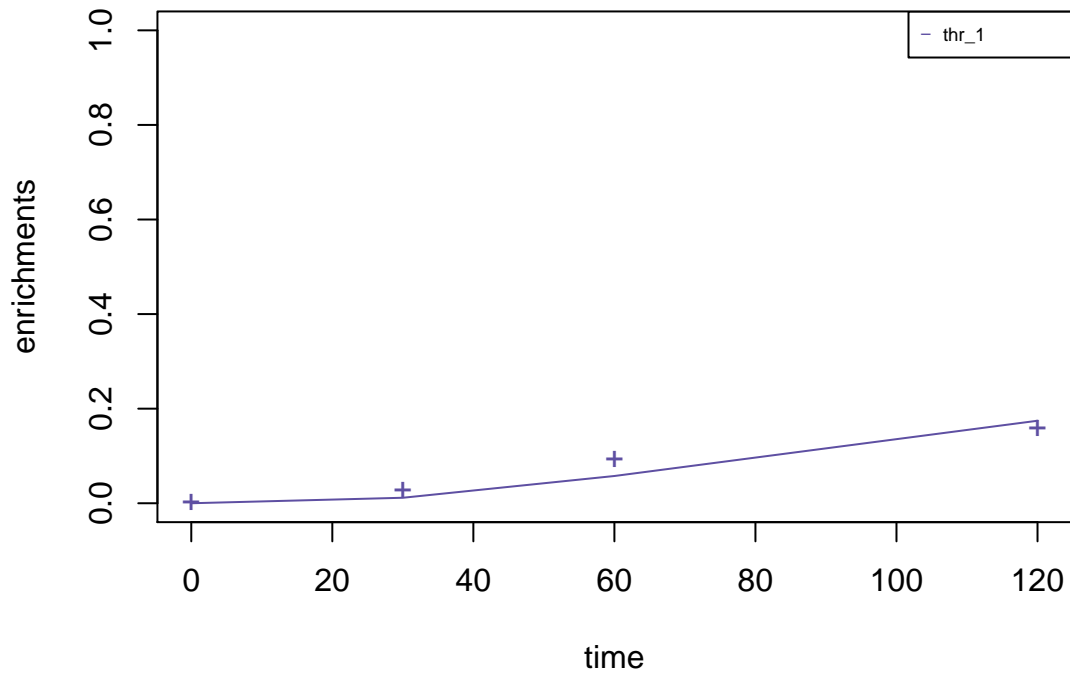

Supplement: s1 [file s1]

## fitting results

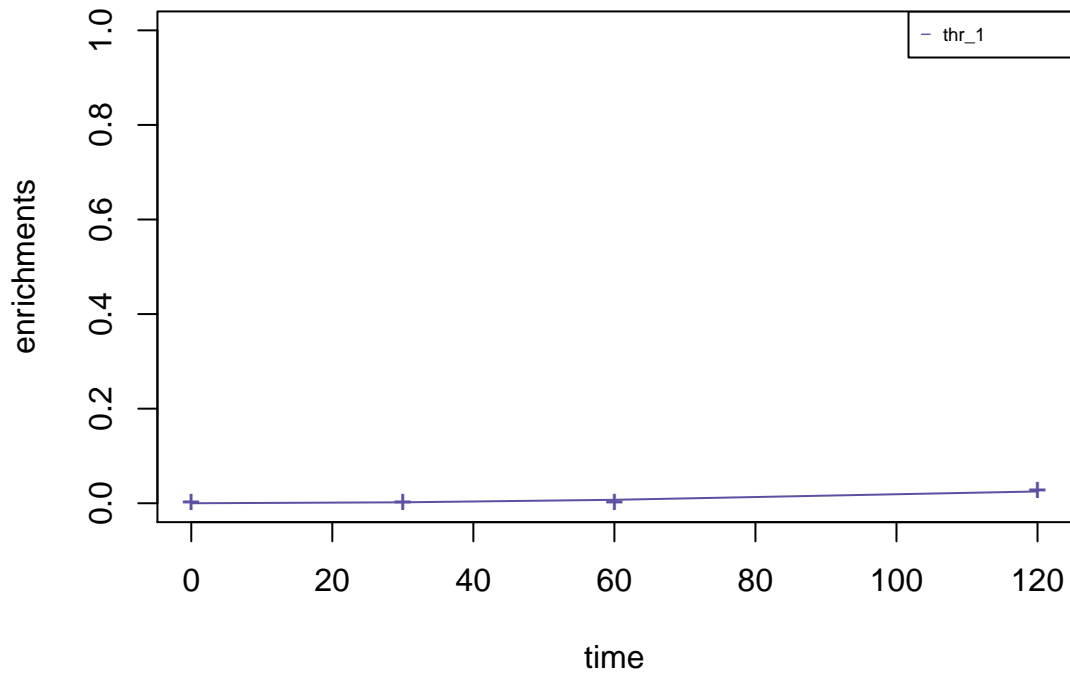

Supplement: s1 [file s1]

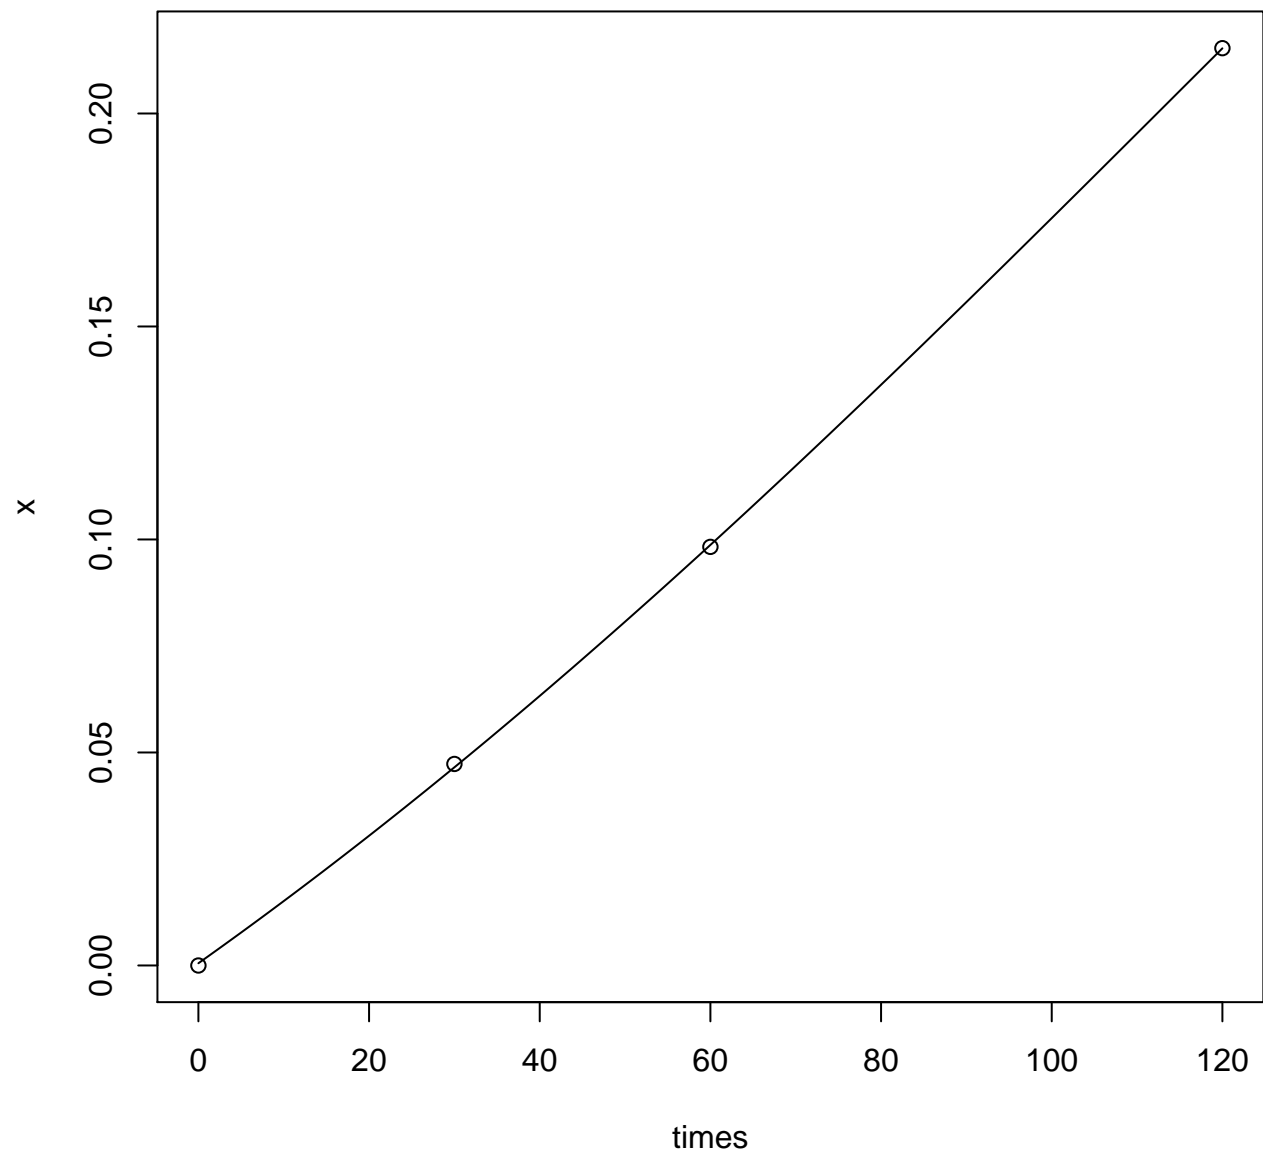

Supplement: s1 [file s1]

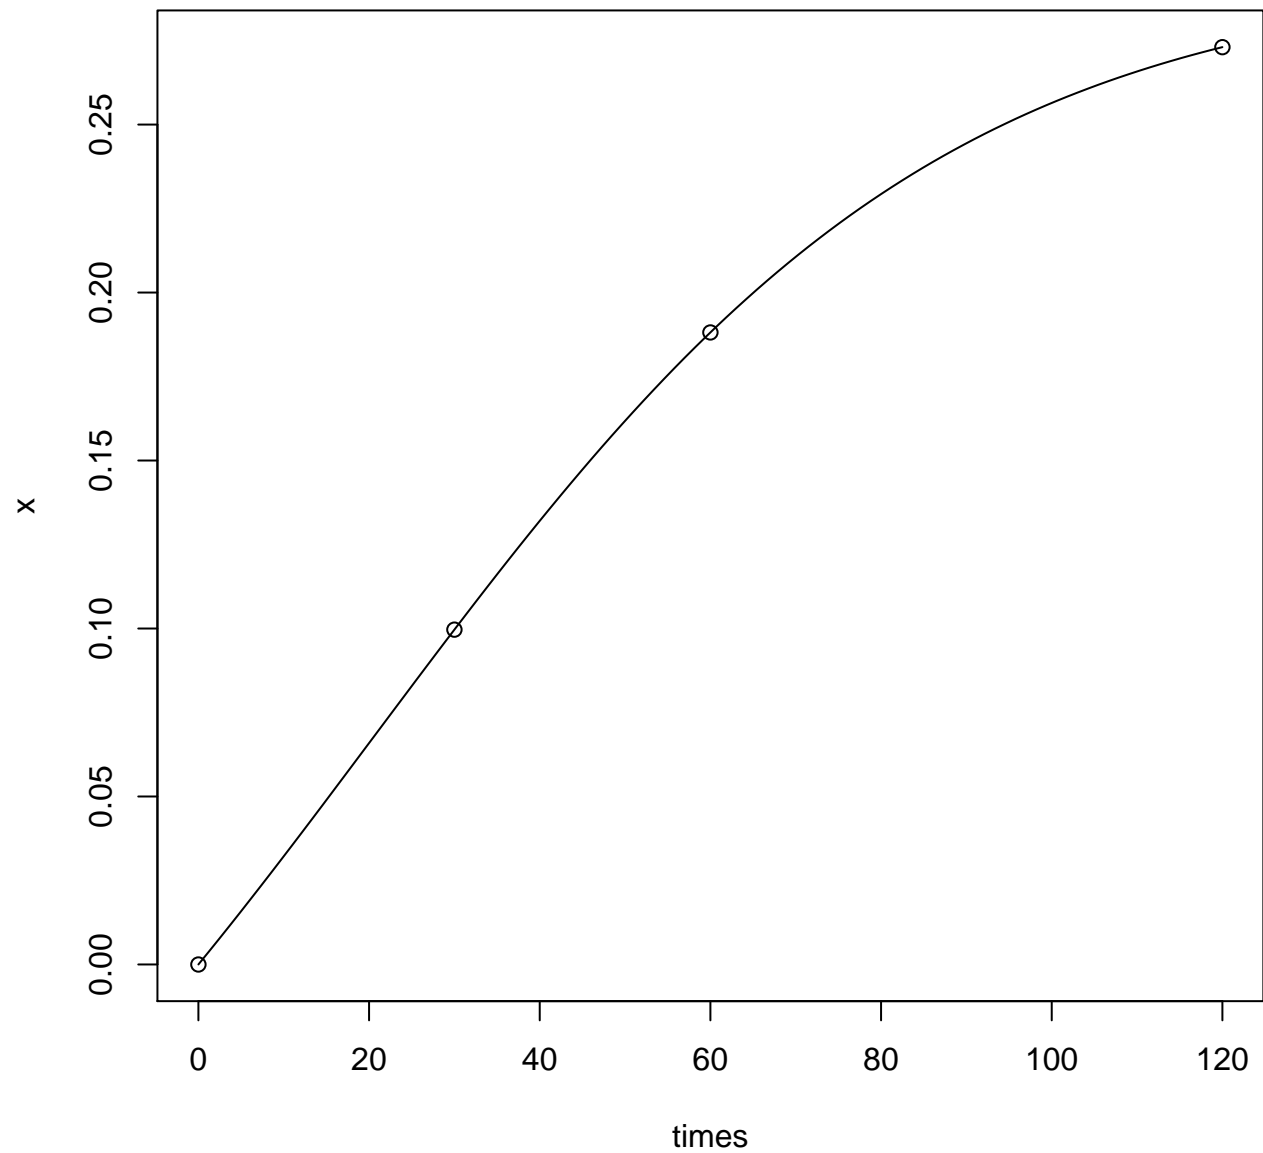

Supplement: s1 [file s1]

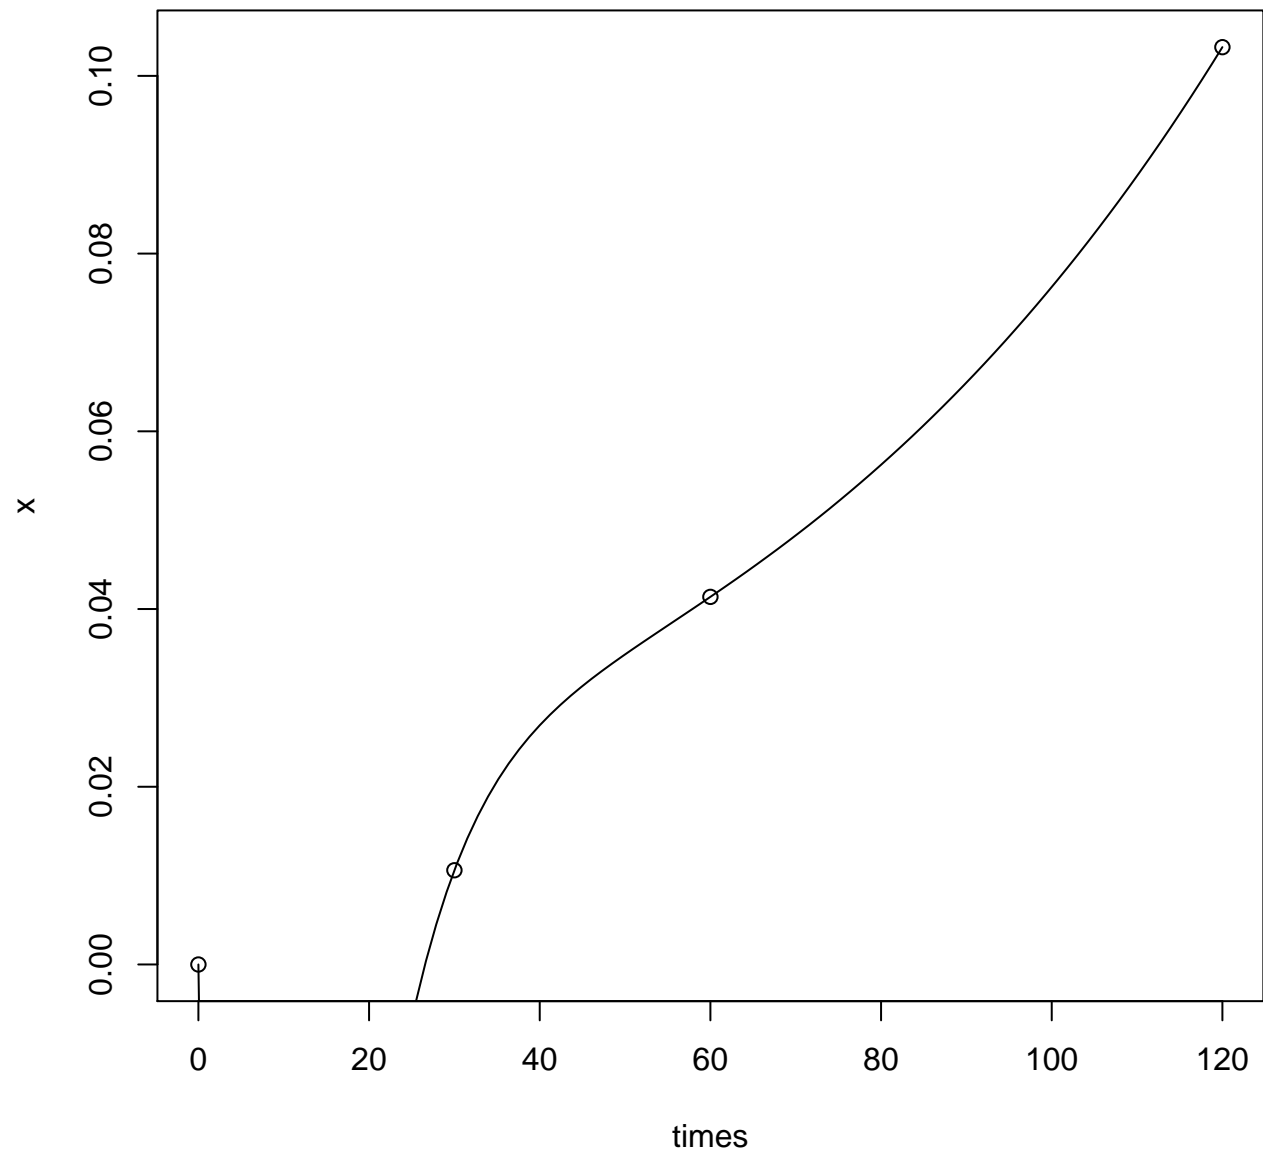

Supplement: s1 [file s1]

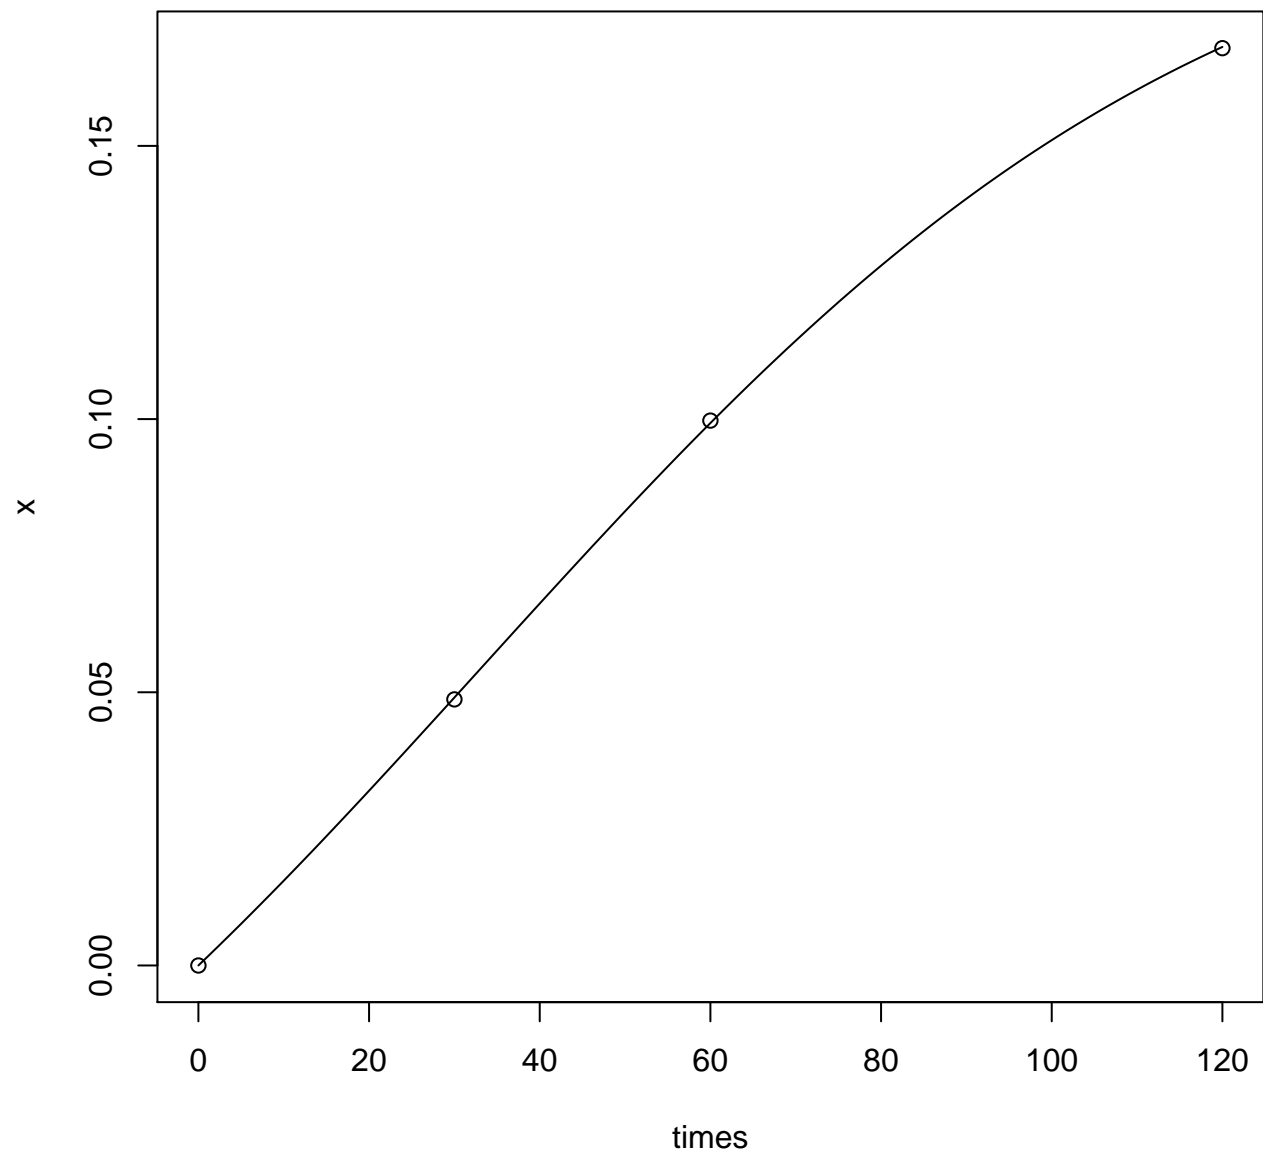

Supplement: s1 [file s1]

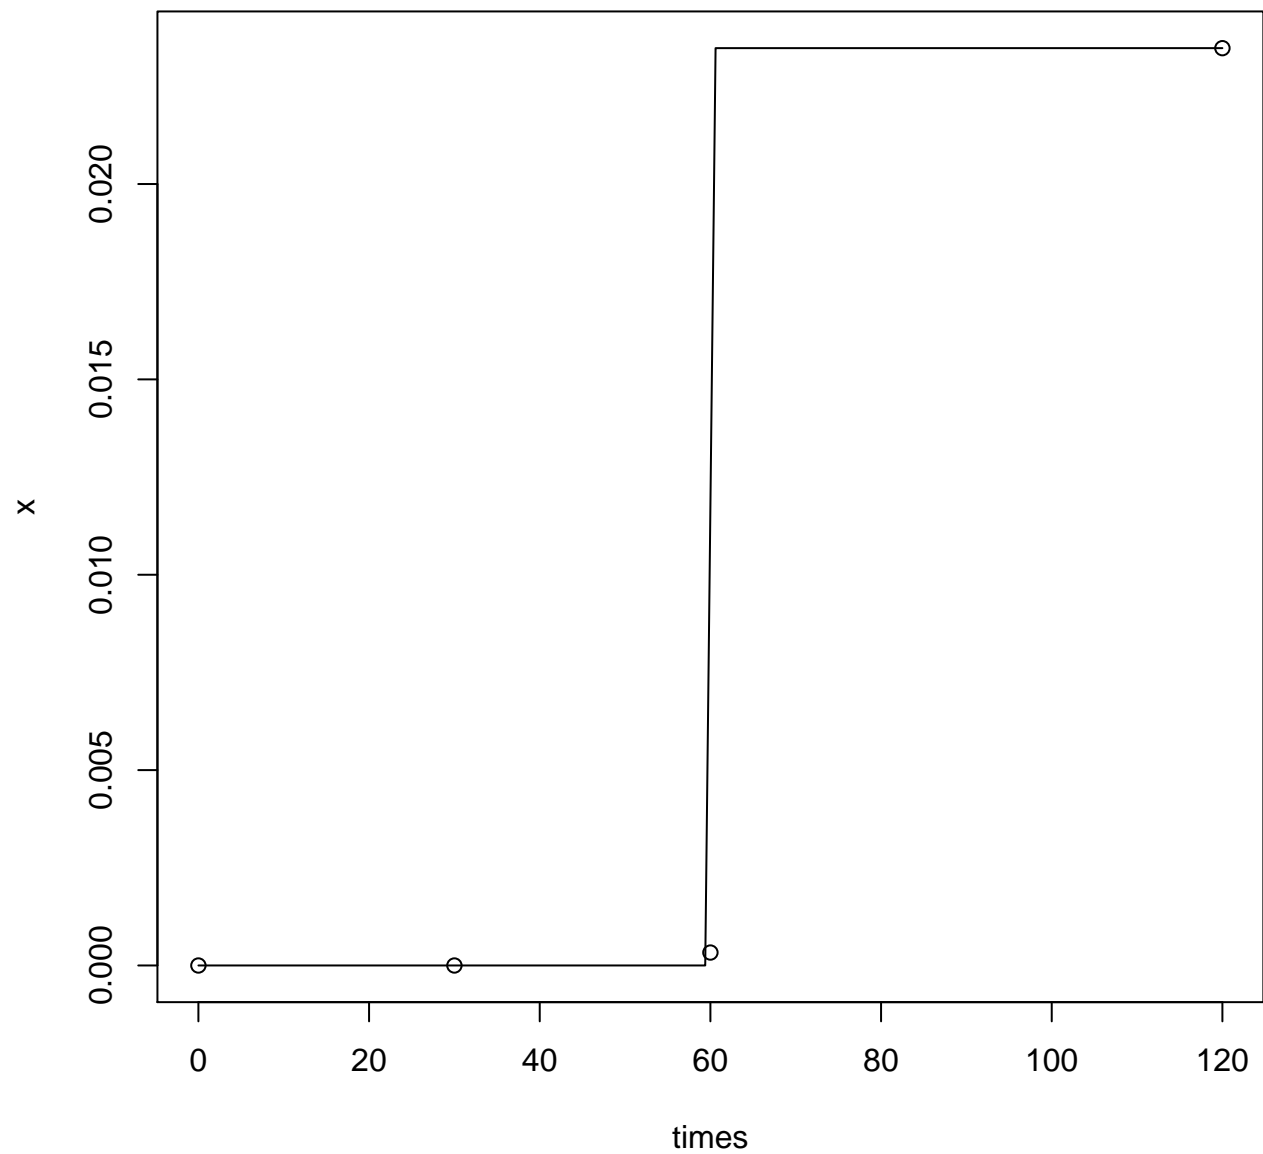

Supplement: s1 [file s1]

## fitting results

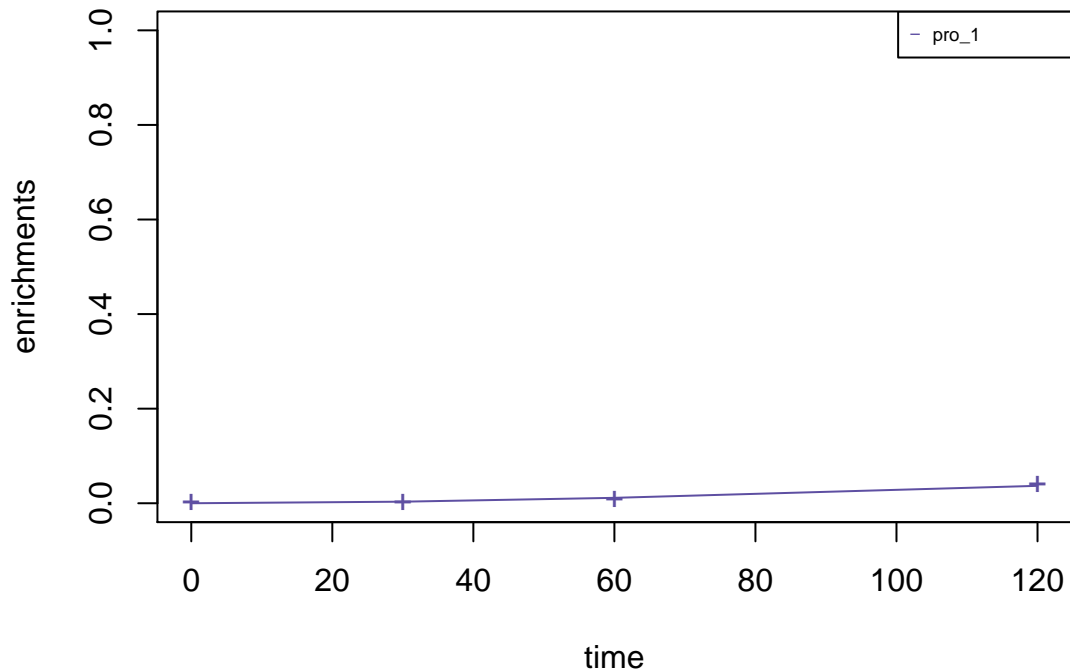

Supplement: s1 [file s1]

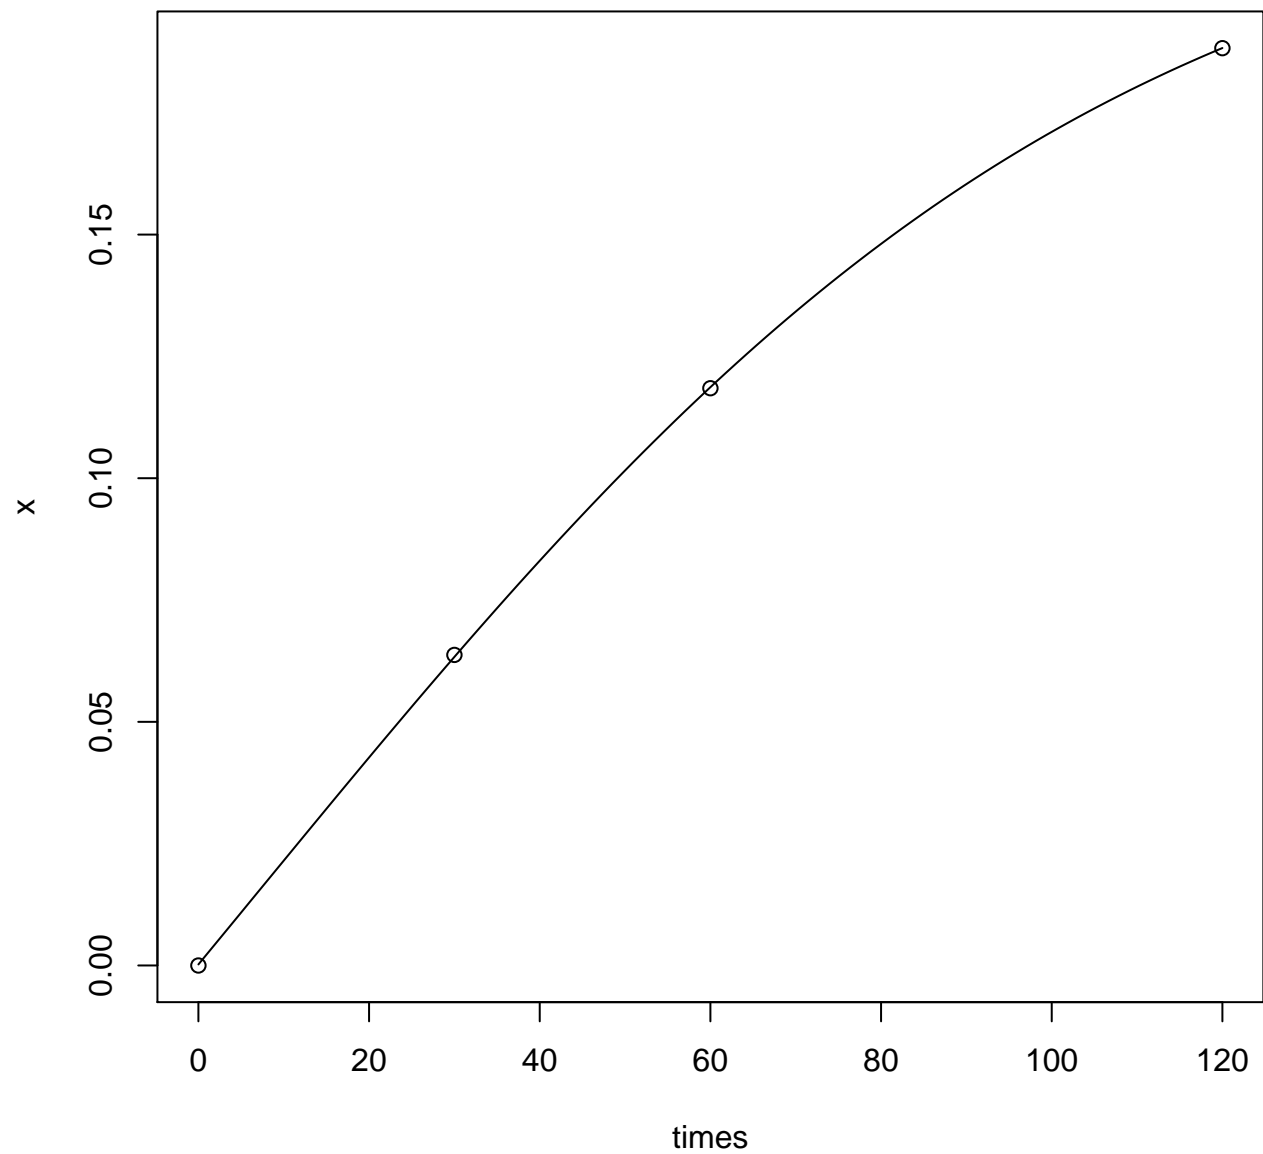

Supplement: s1 [file s1]

## fitting results

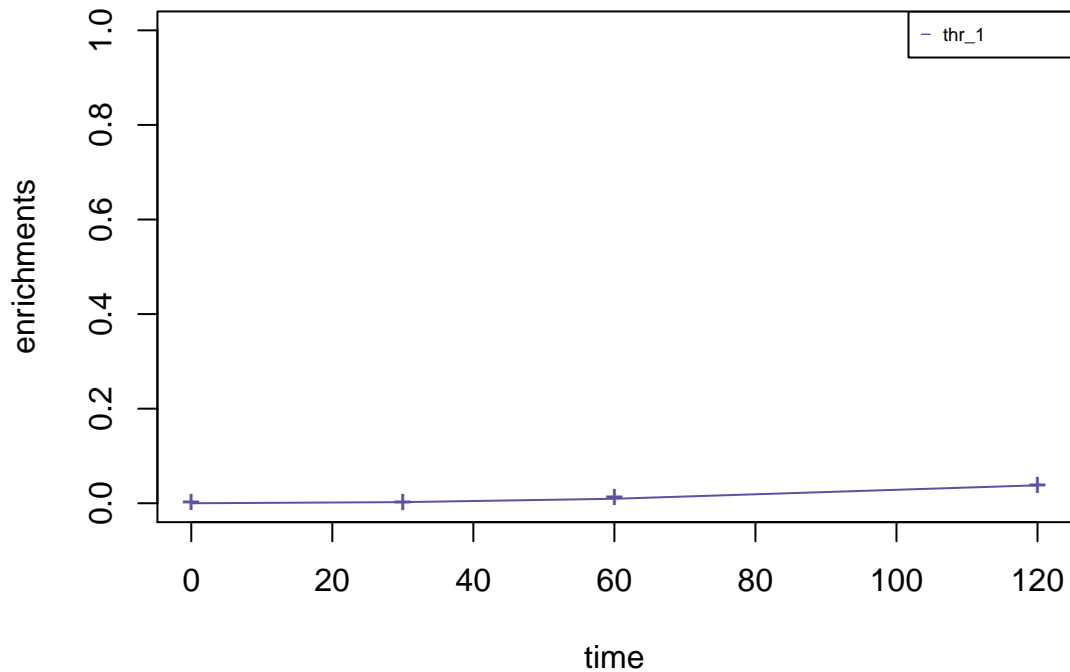

Supplement: s1 [file s1]

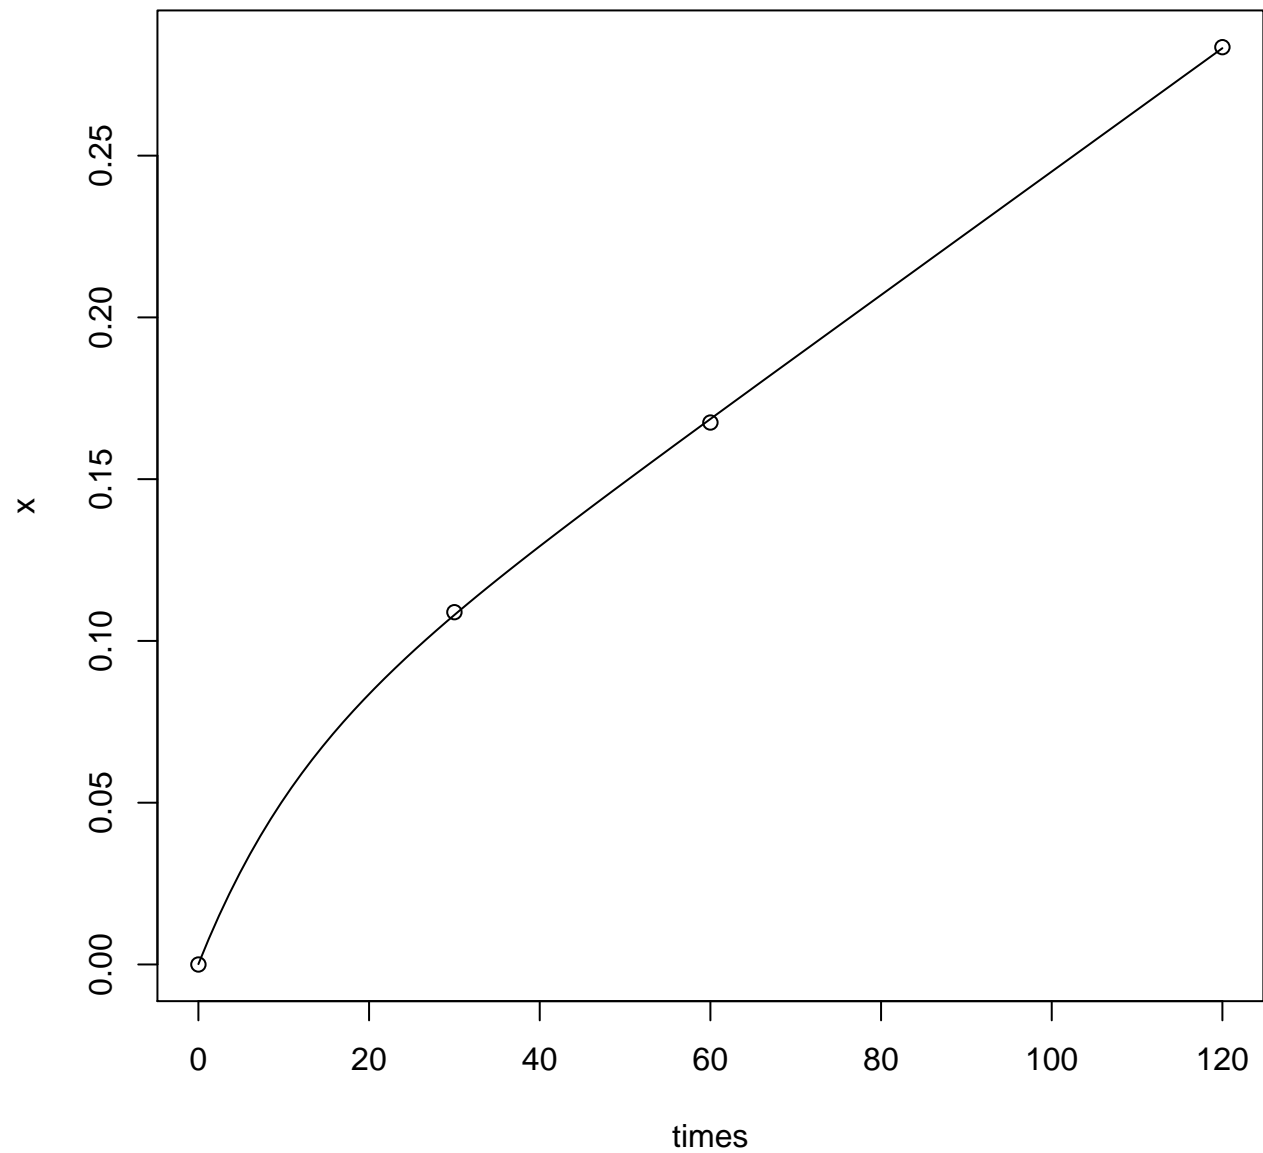

Supplement: s1 [file s1]

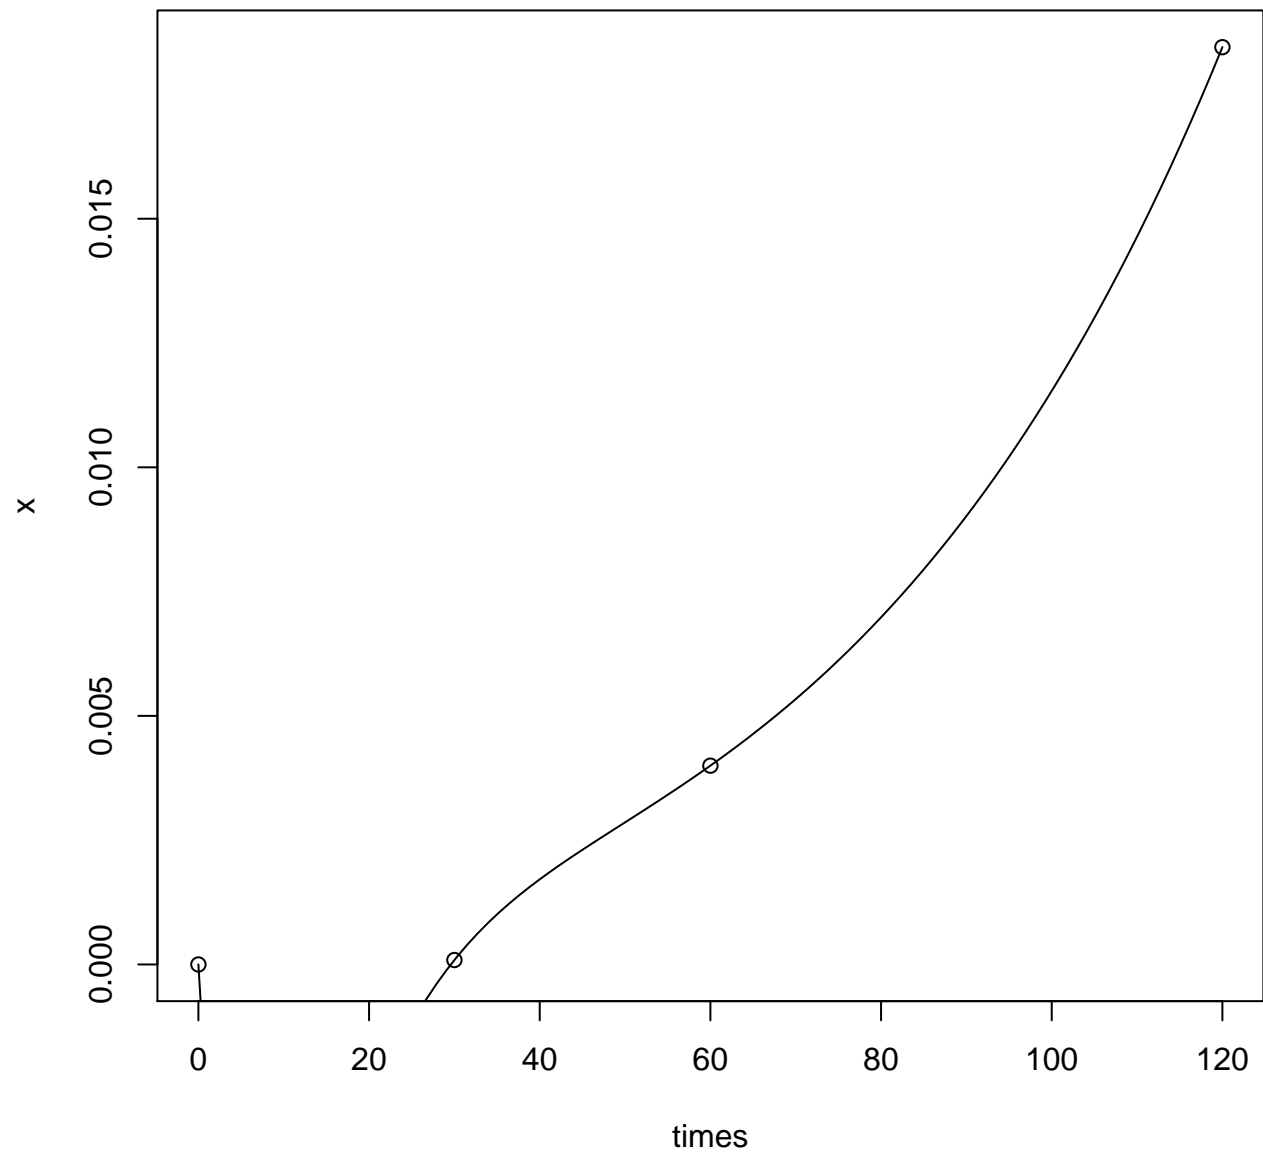

Supplement: s1 [file s1]

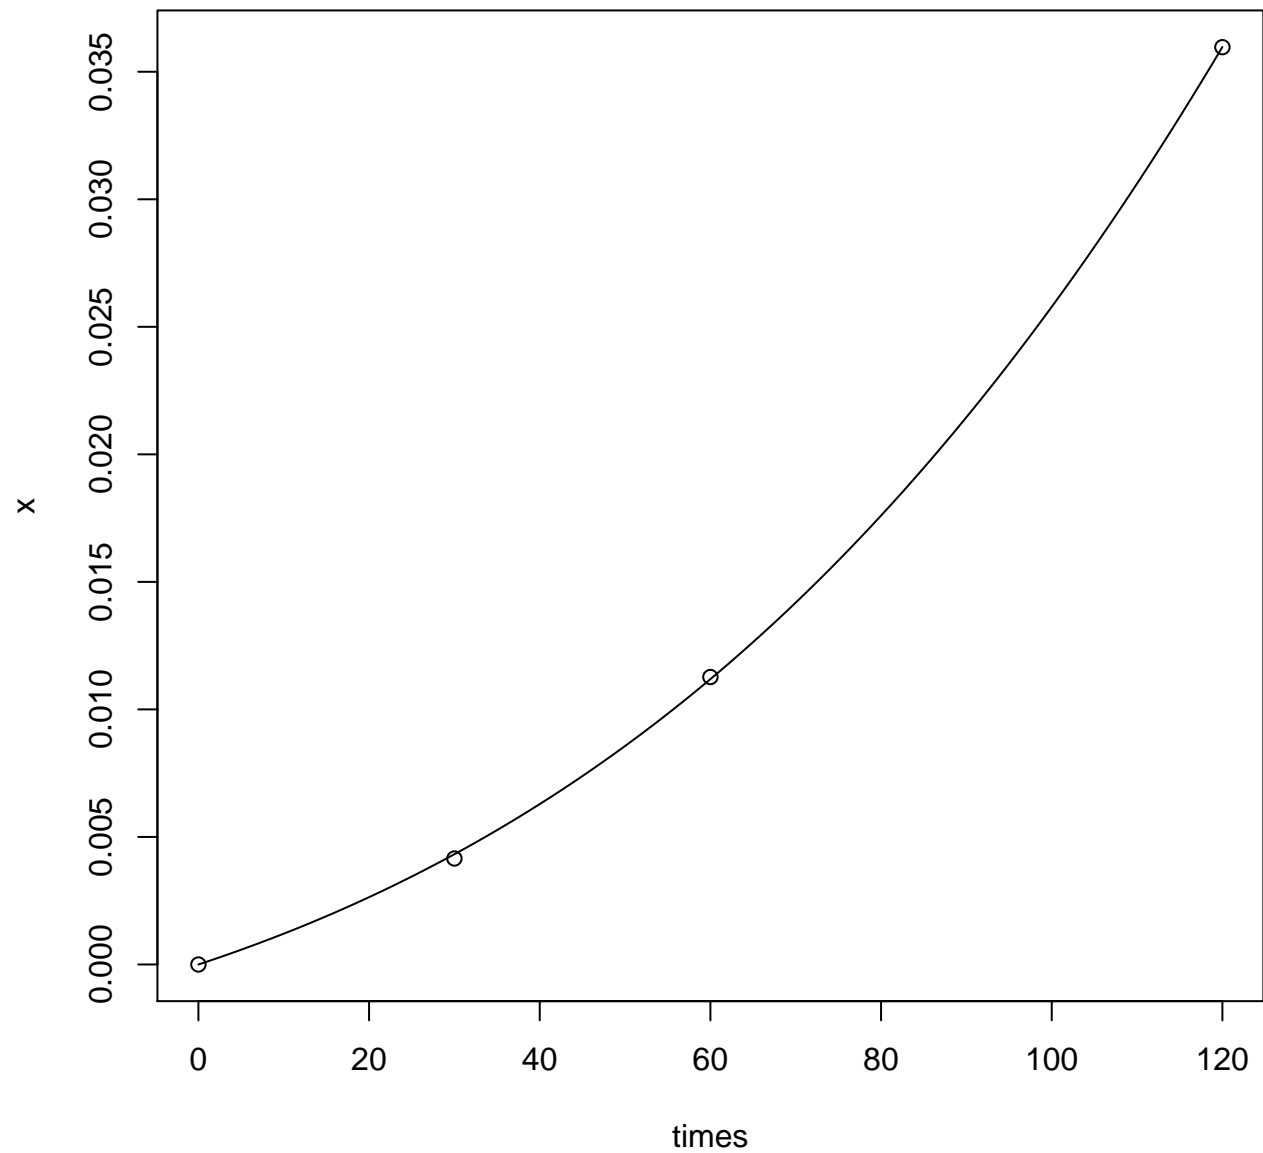

Supplement: s1 [file s1]

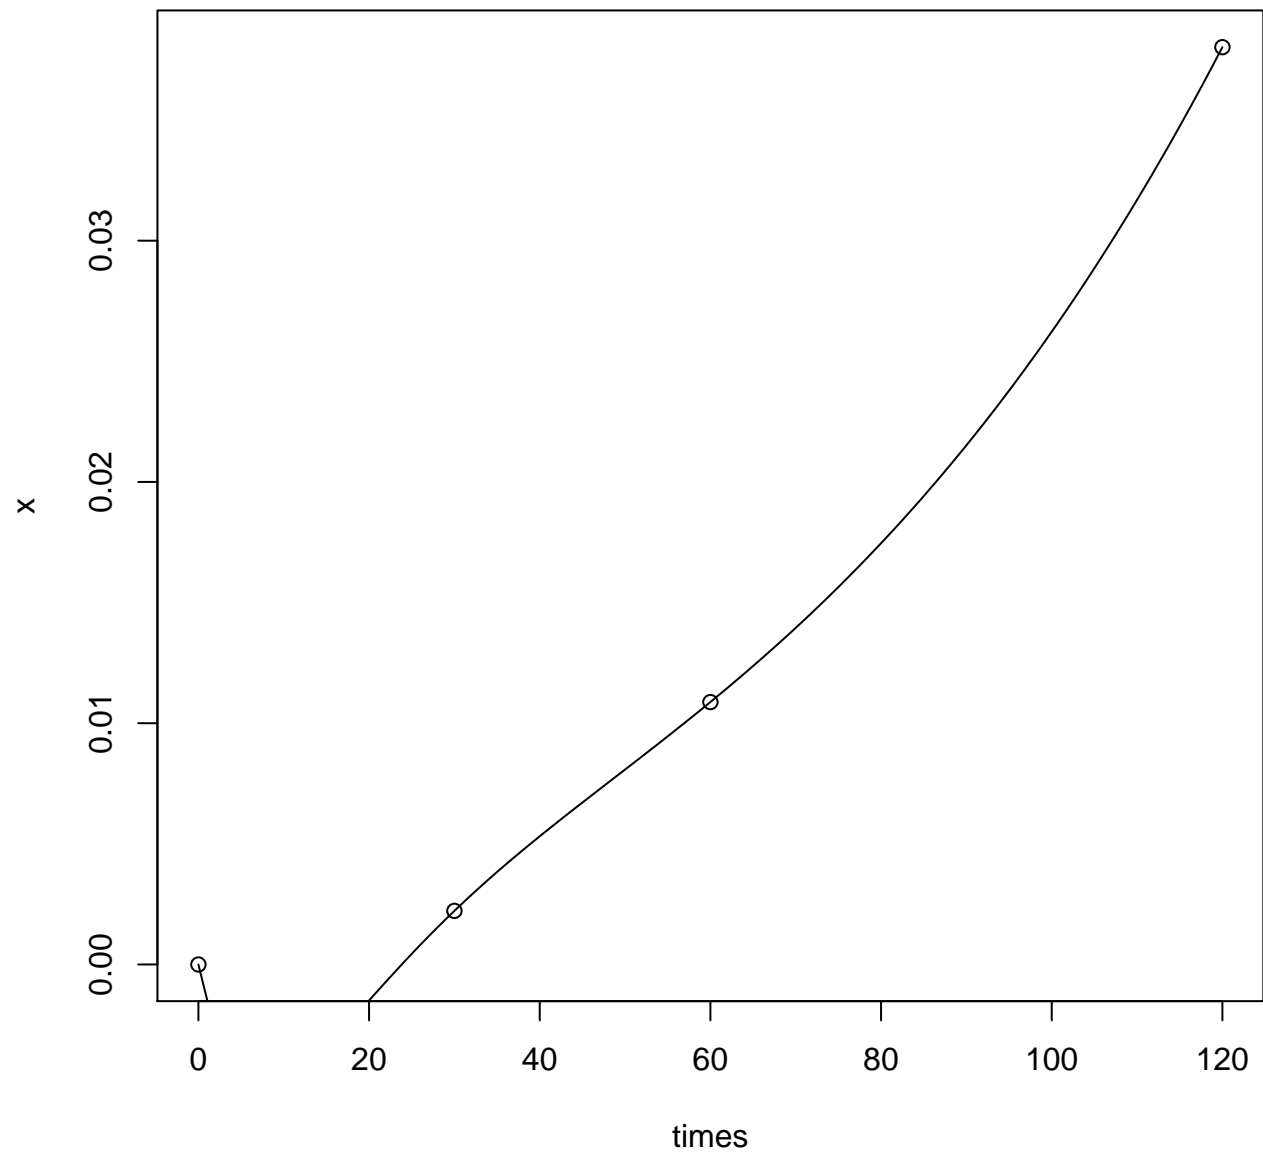

Supplement: s1 [file s1]

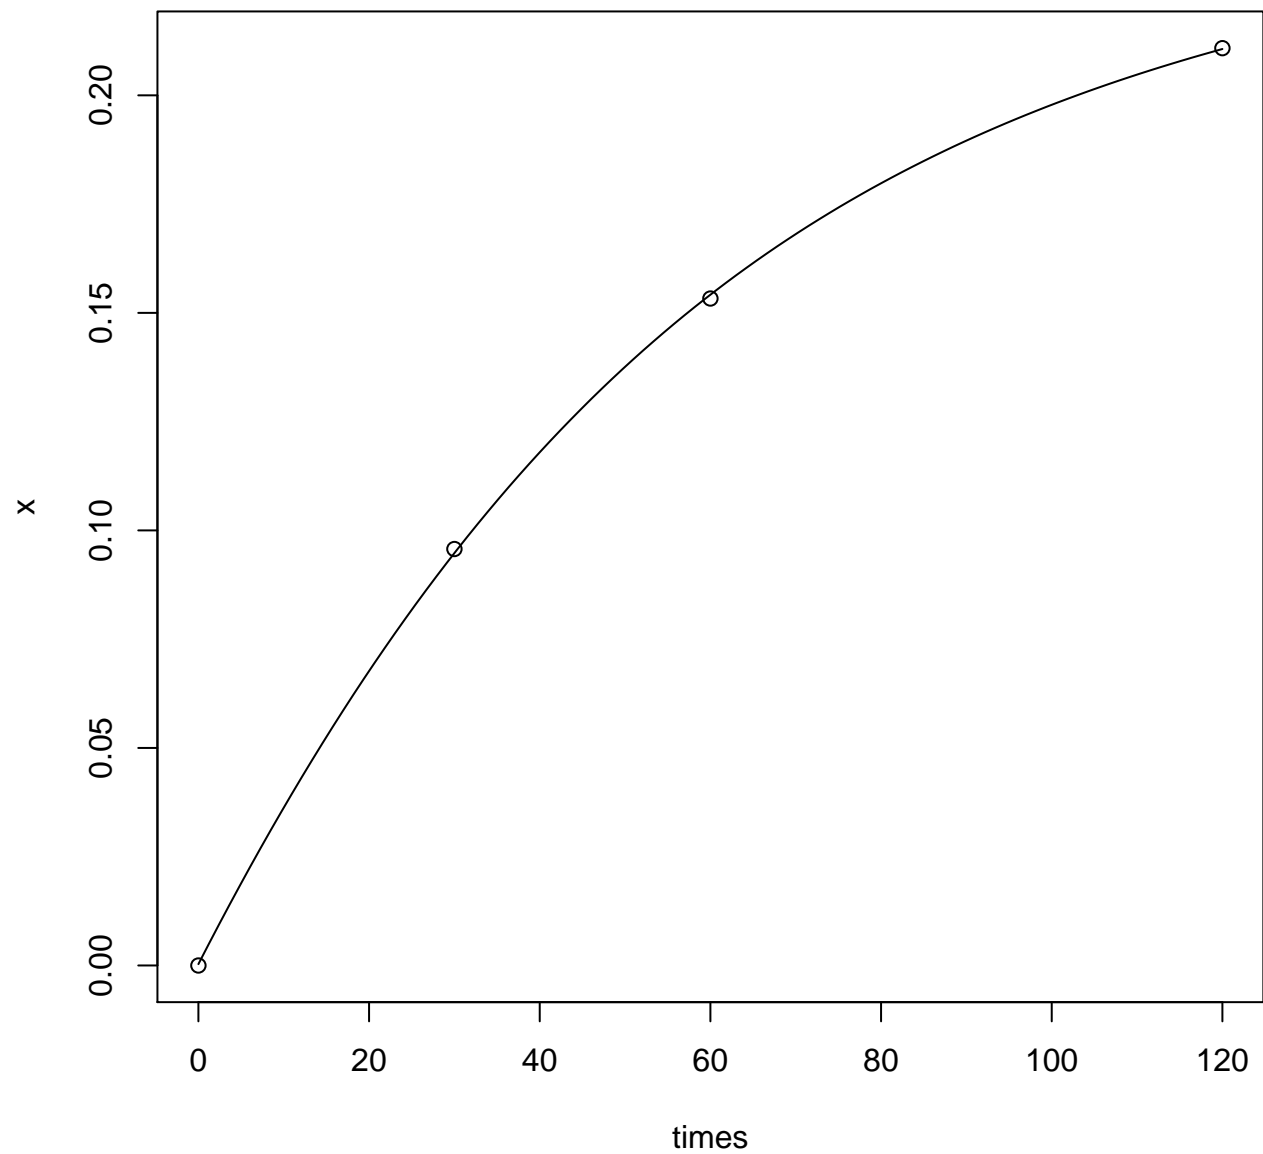

Supplement: s1 [file s1]

## fitting results

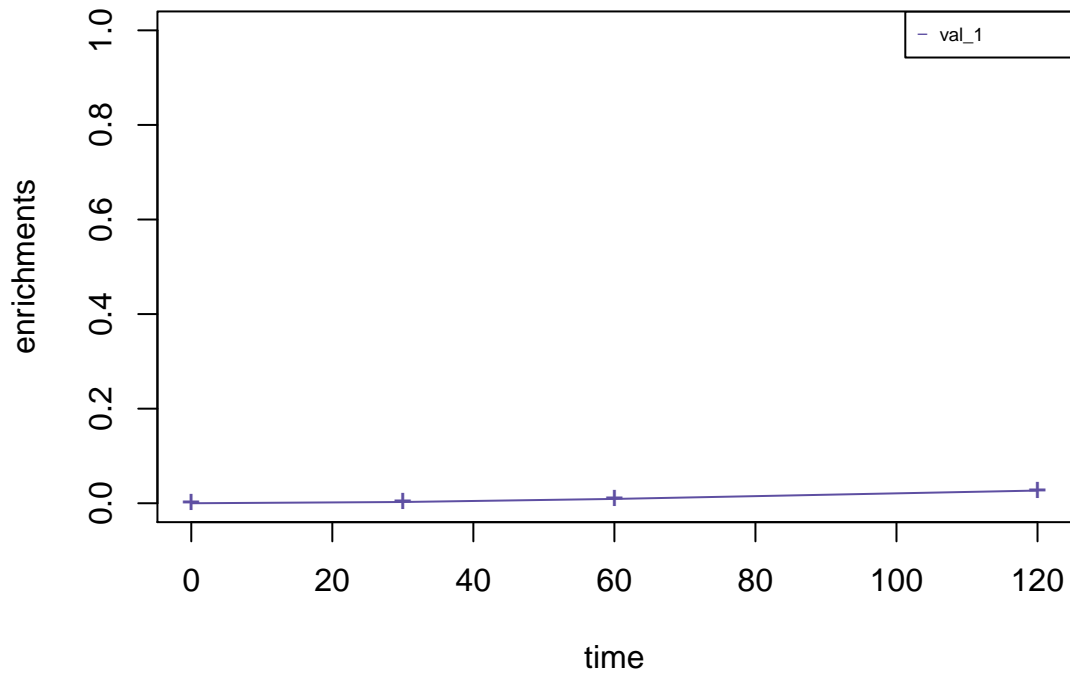

Supplement: s1 [file s1]

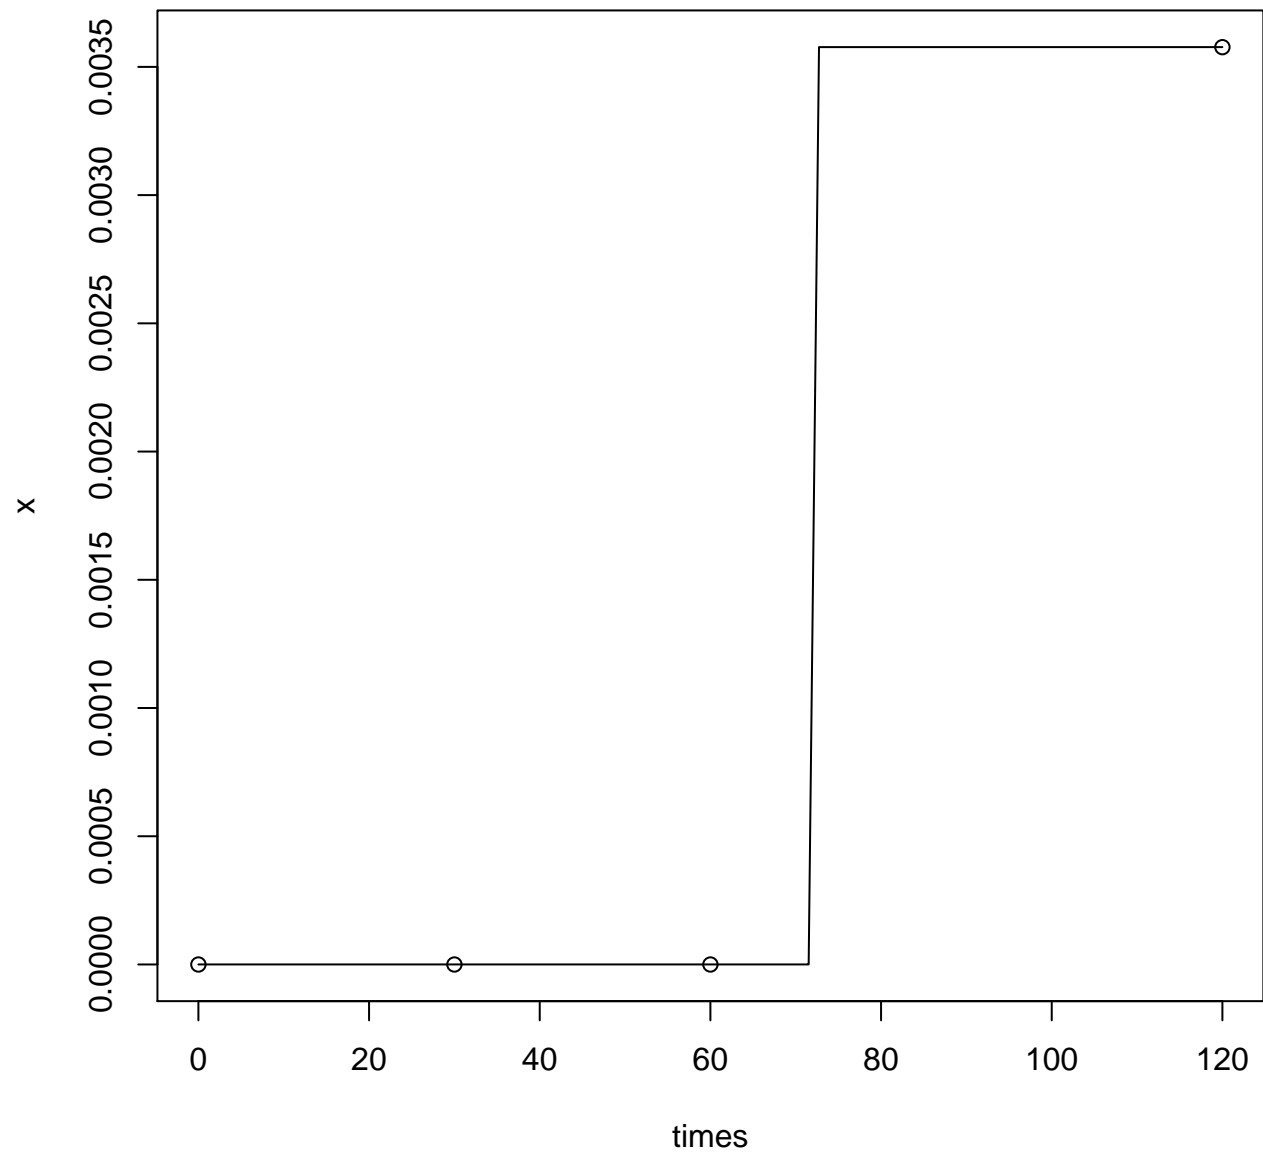

Supplement: s1 [file s1]

## fitting results

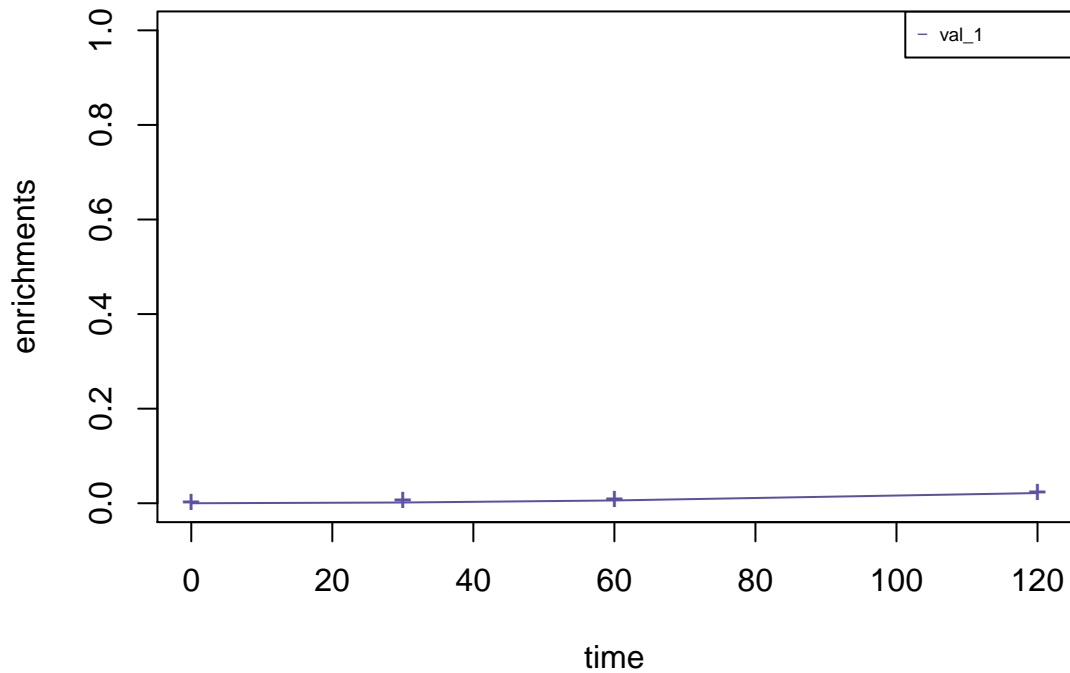

Supplement: s1 [file s1]

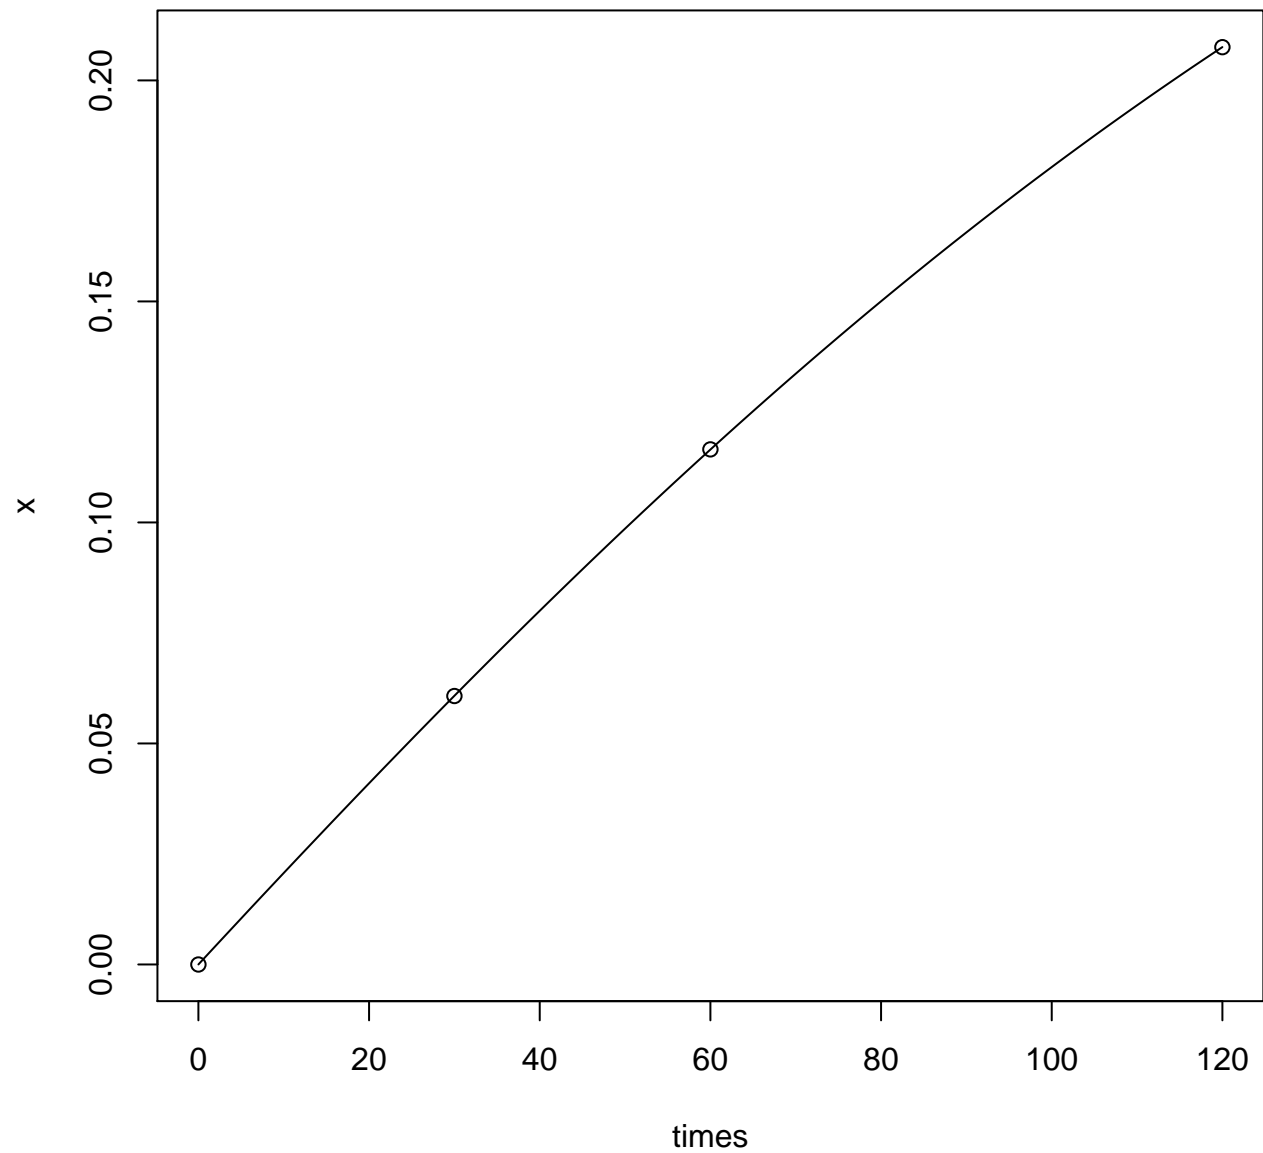

Supplement: s1 [file s1]

## fitting results

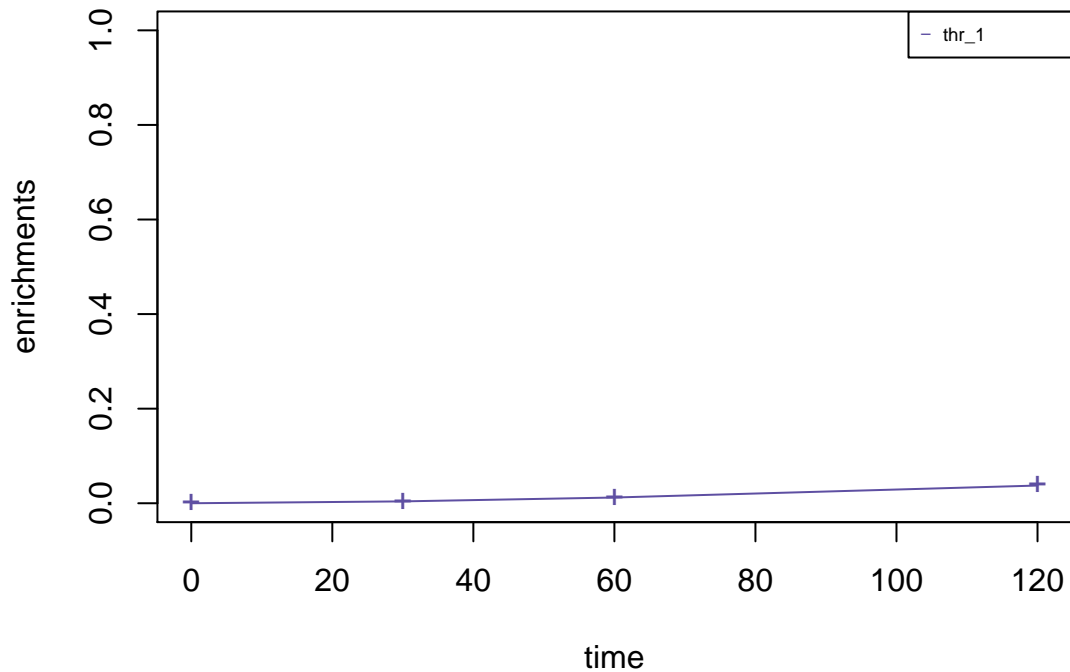

Supplement: s1 [file s1]

## fitting results

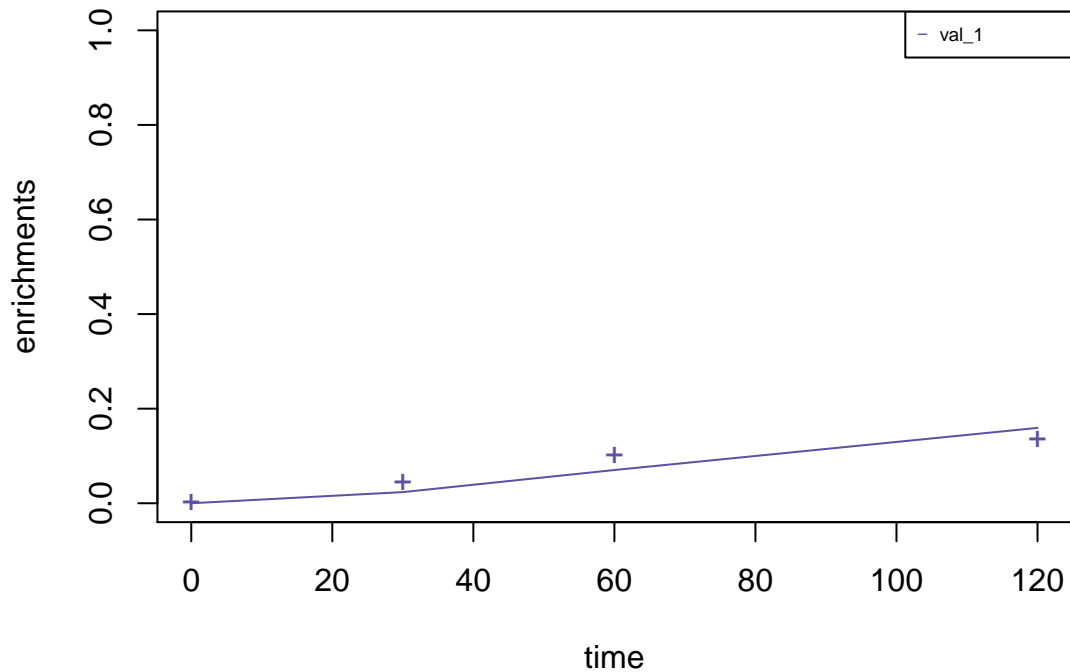

Supplement: s1 [file s1]

## fitting results

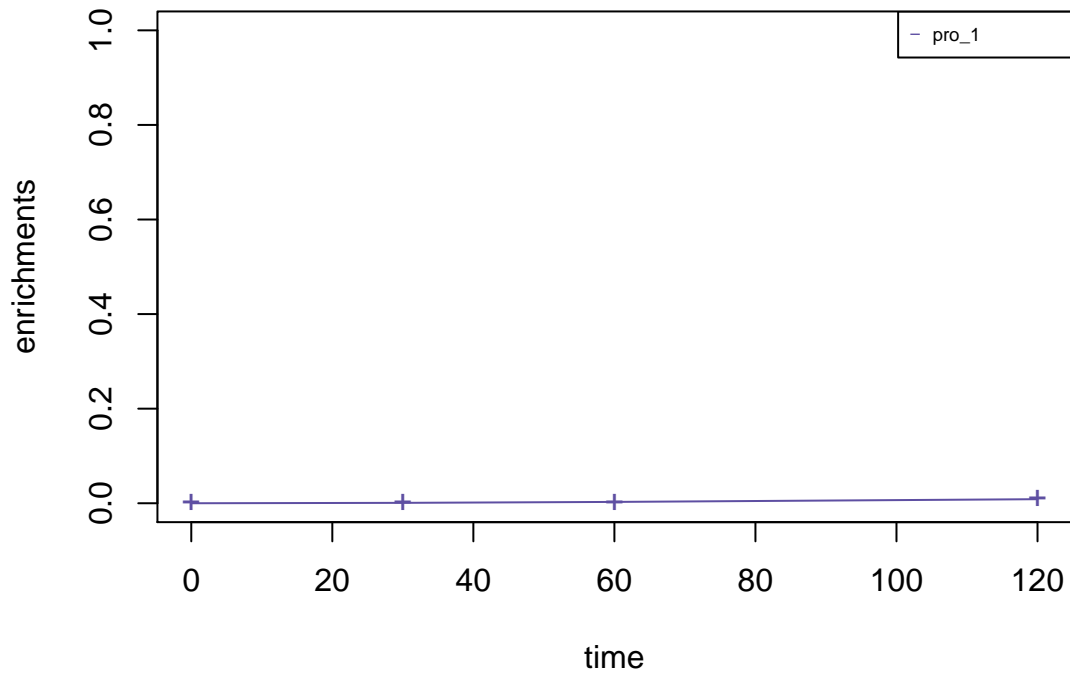

Supplement: s1 [file s1]

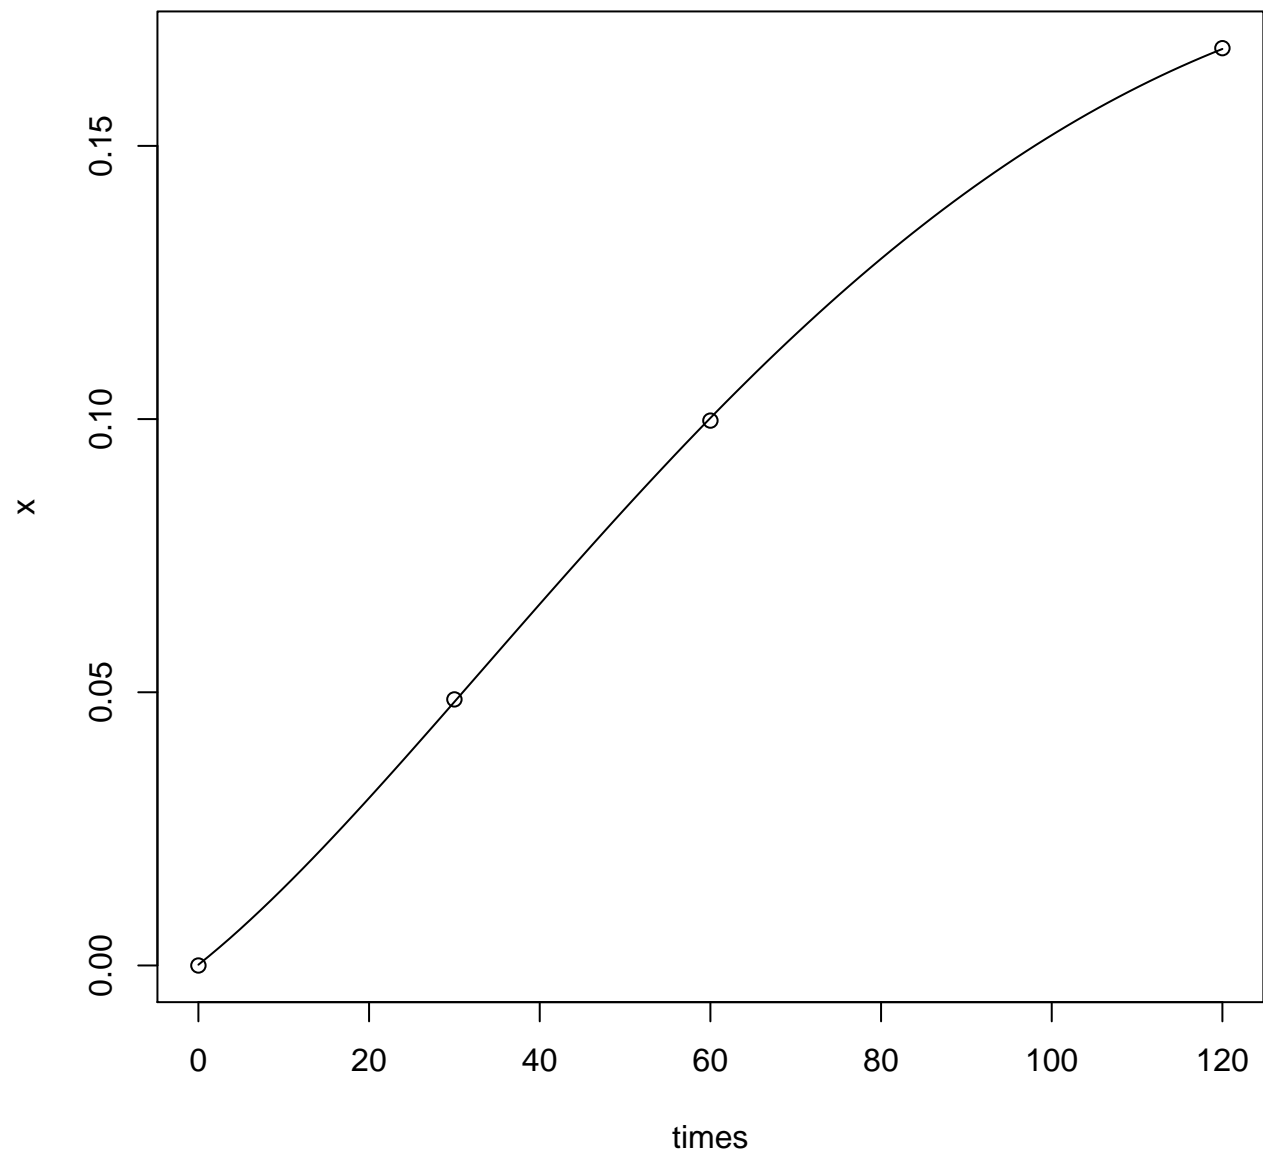

Supplement: s1 [file s1]

## fitting results

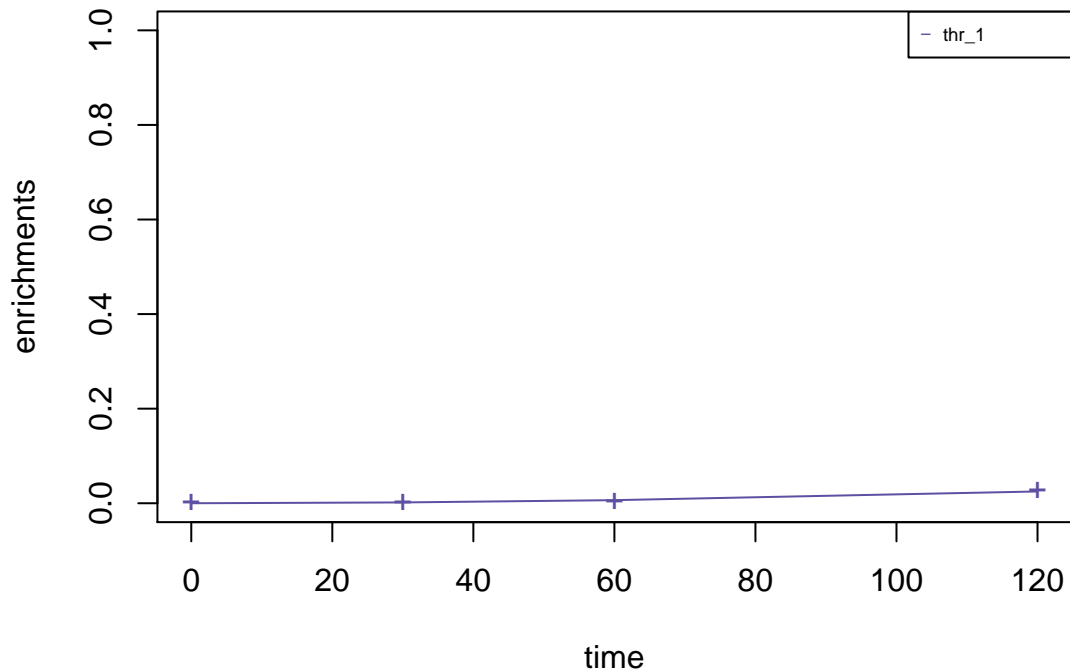

Supplement: s1 [file s1]

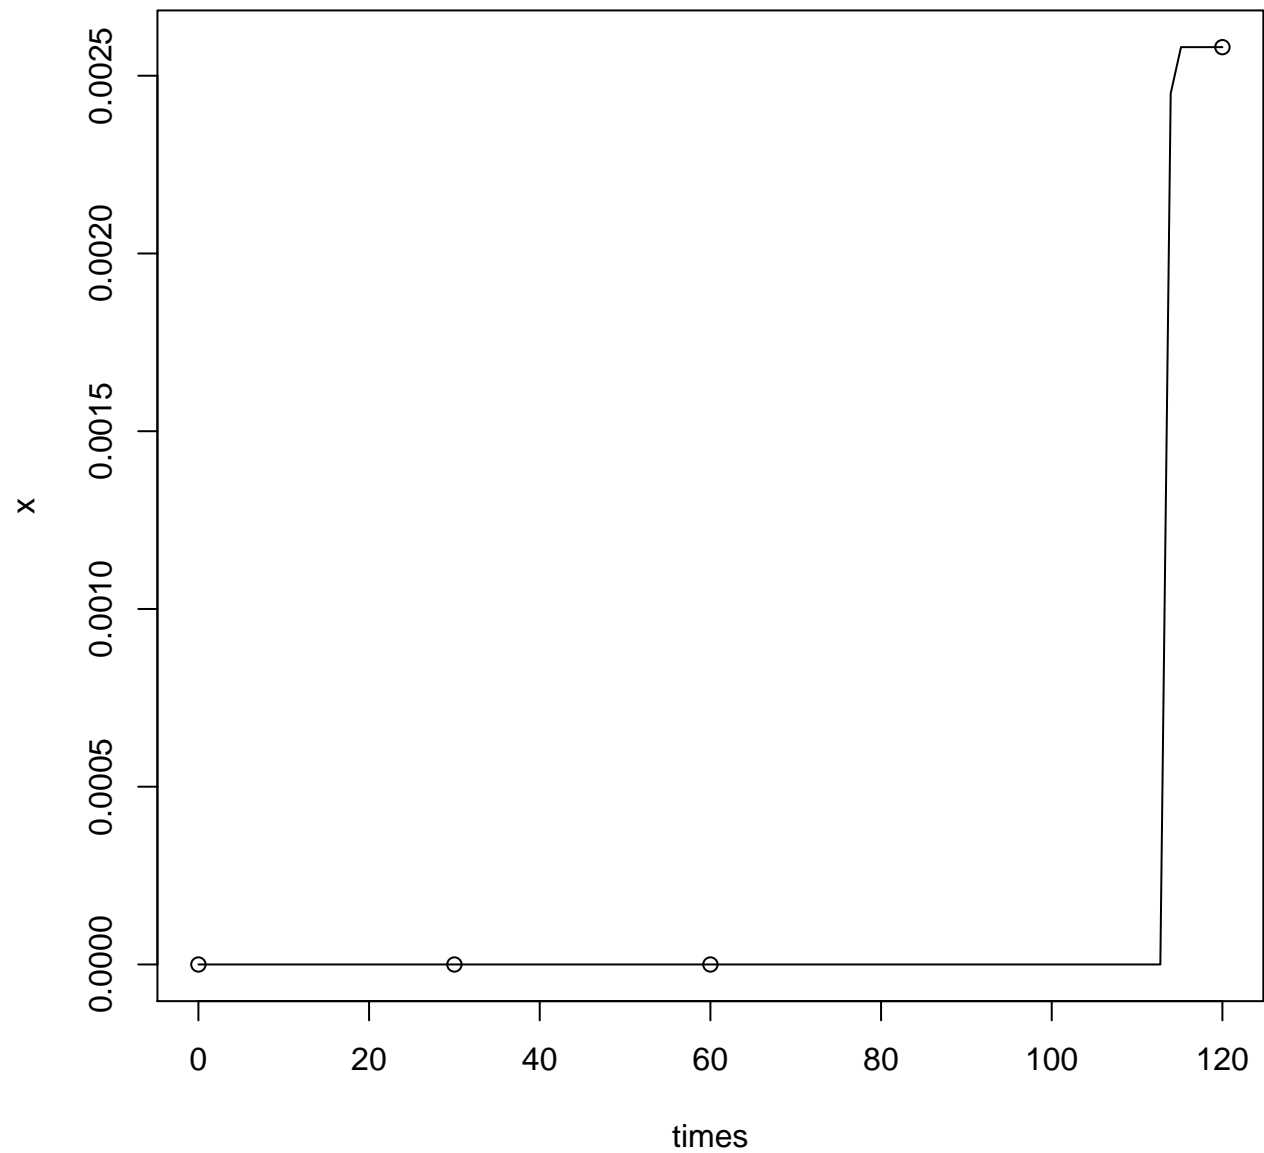

Supplement: s1 [file s1]

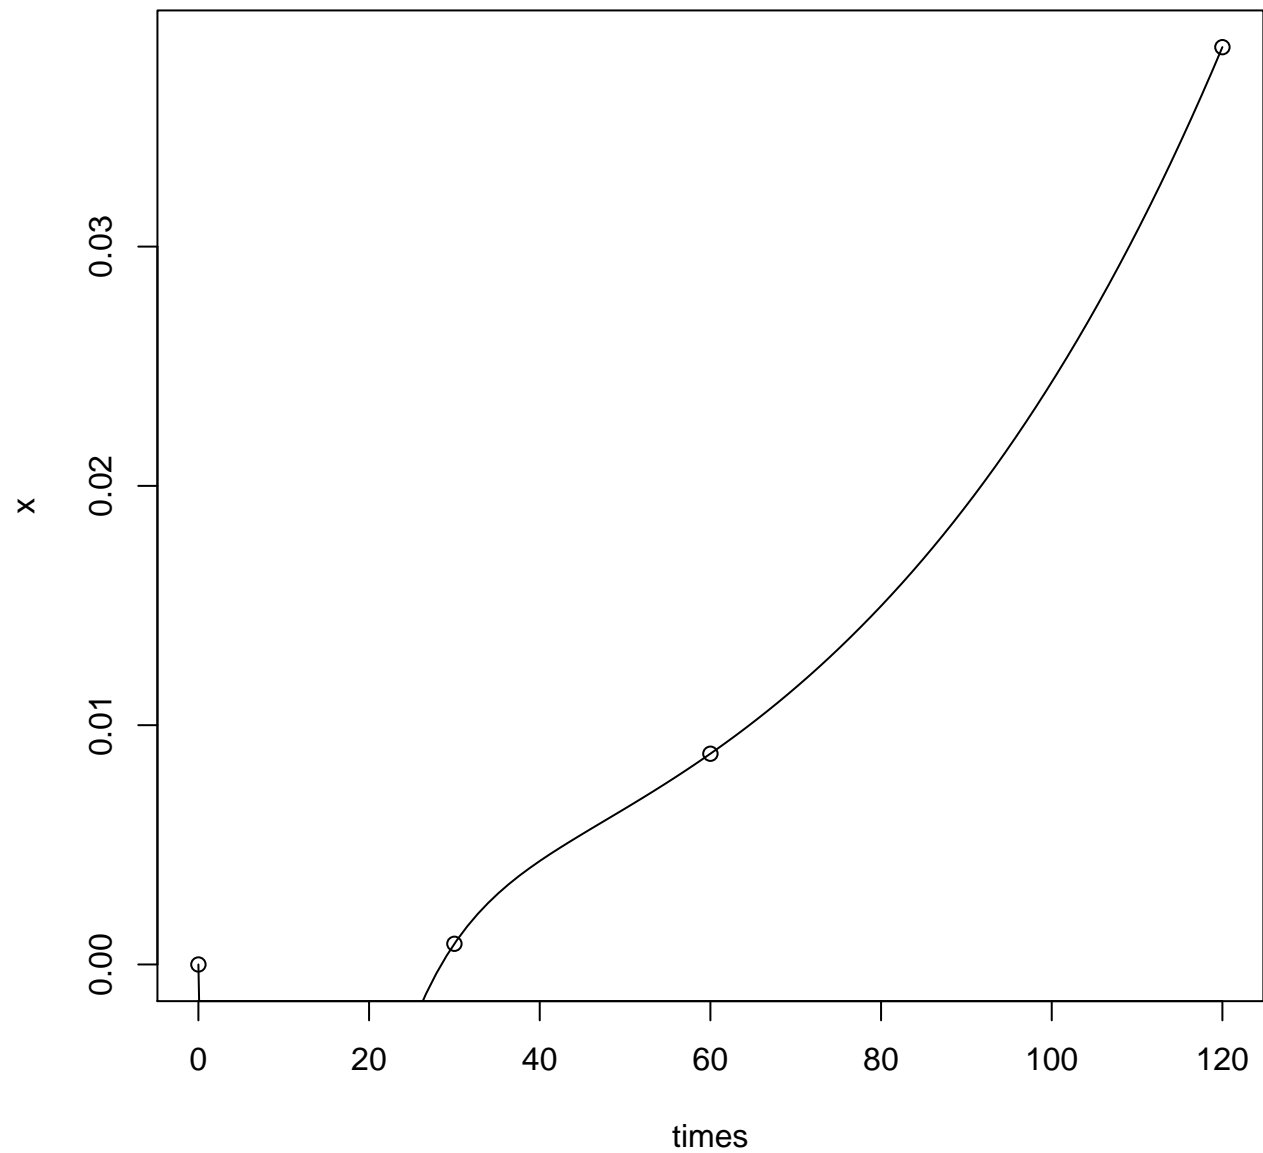

Supplement: s1 [file s1]

## fitting results

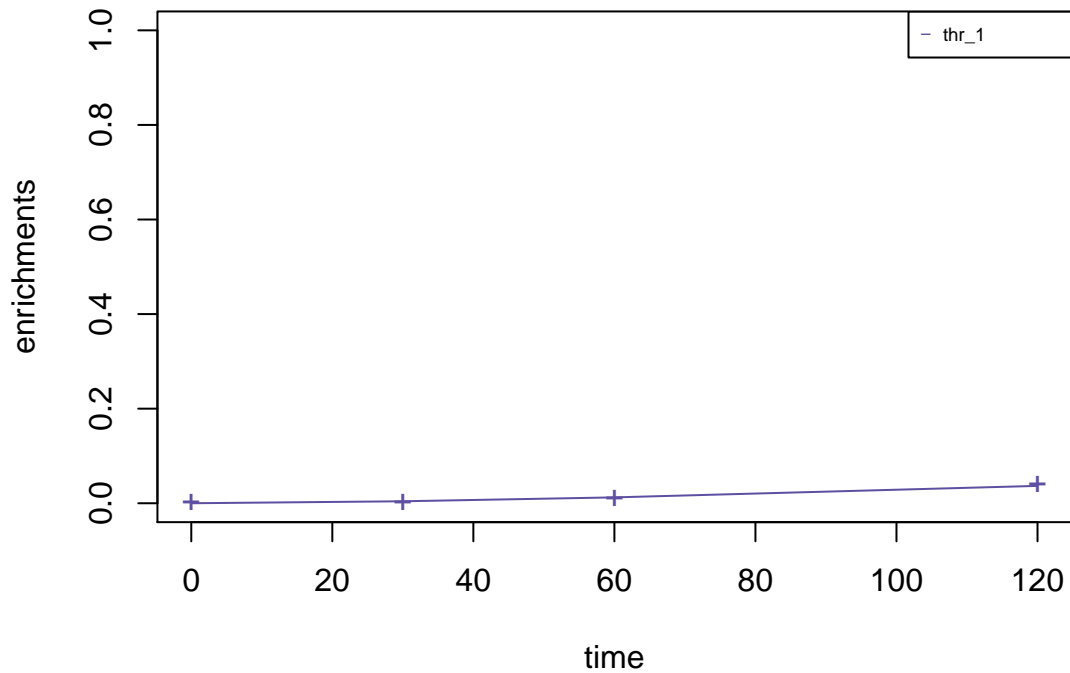

Supplement: s1 [file s1]

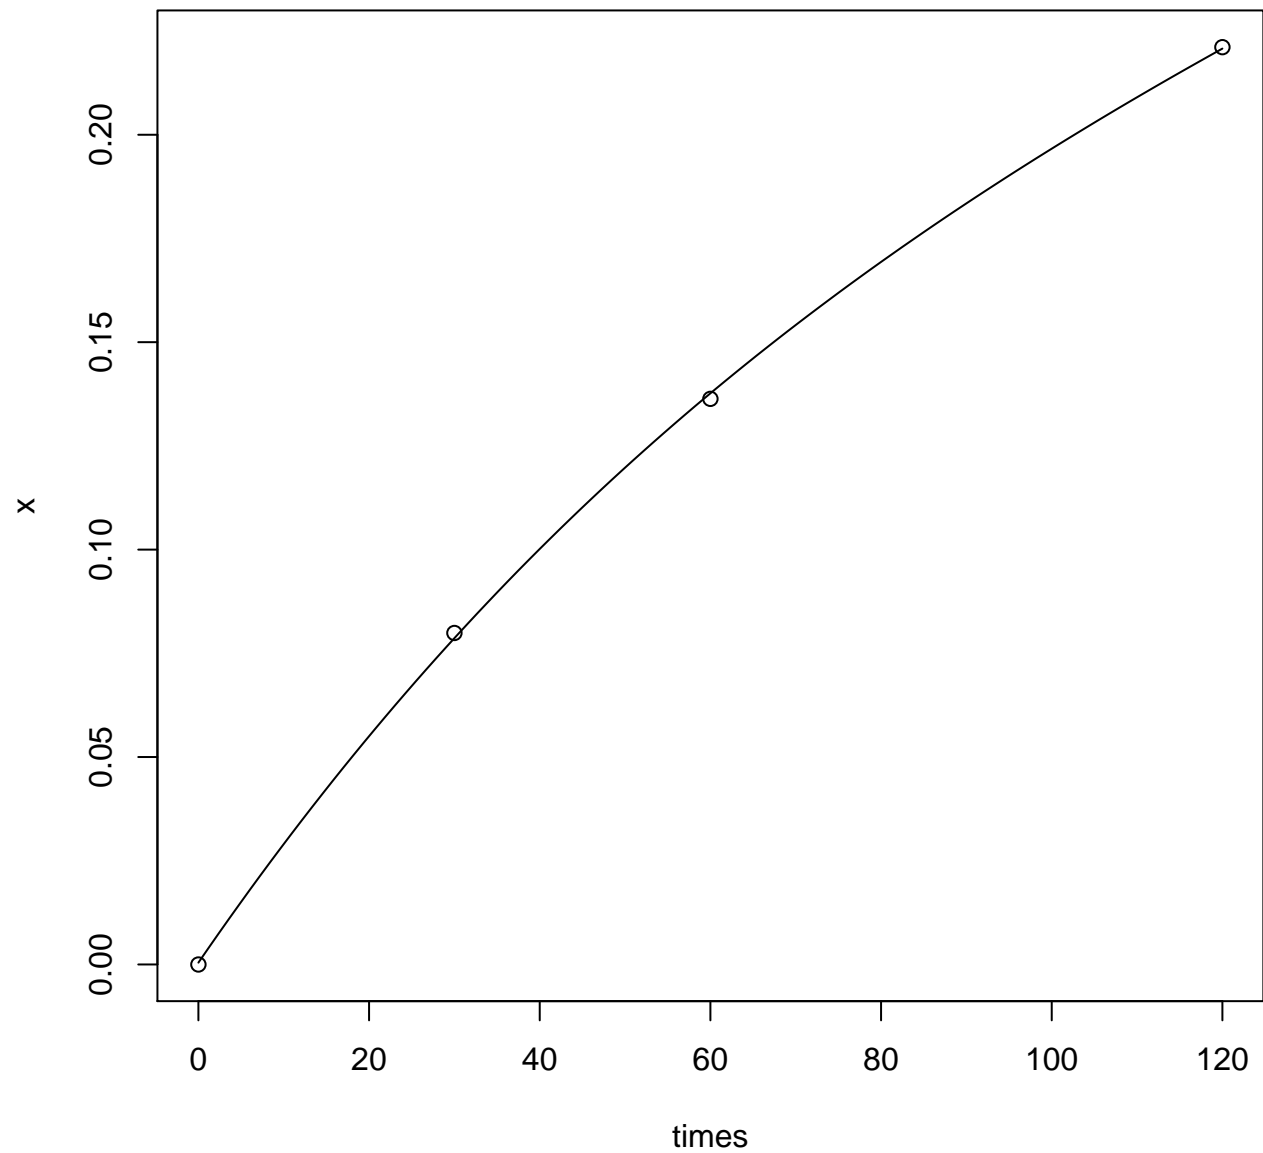

Supplement: s1 [file s1]

## fitting results

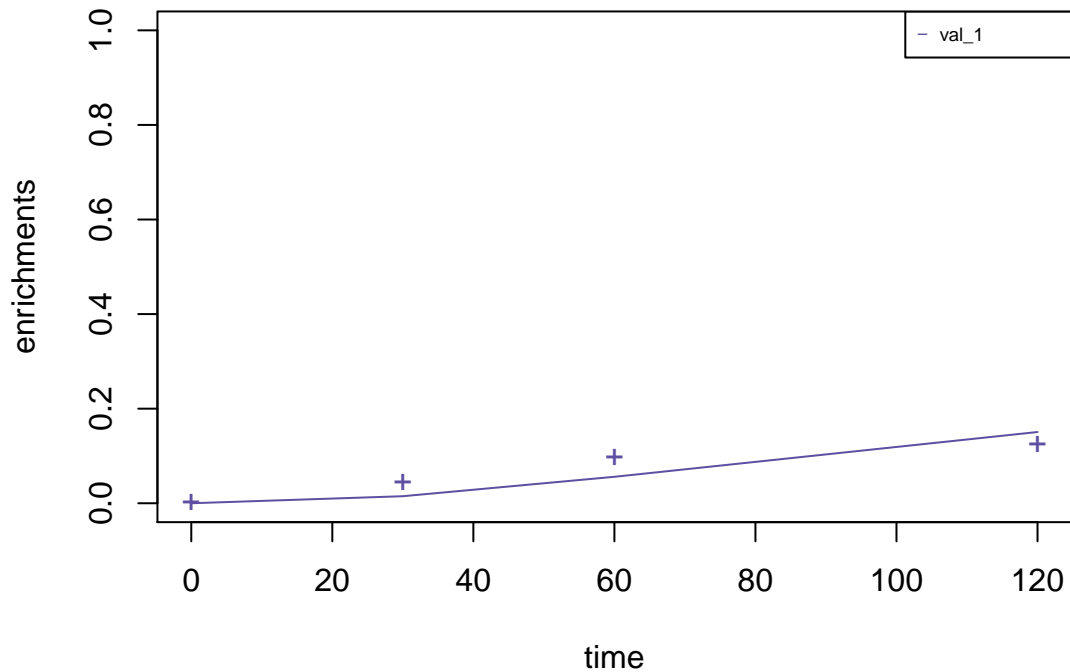

Supplement: s1 [file s1]

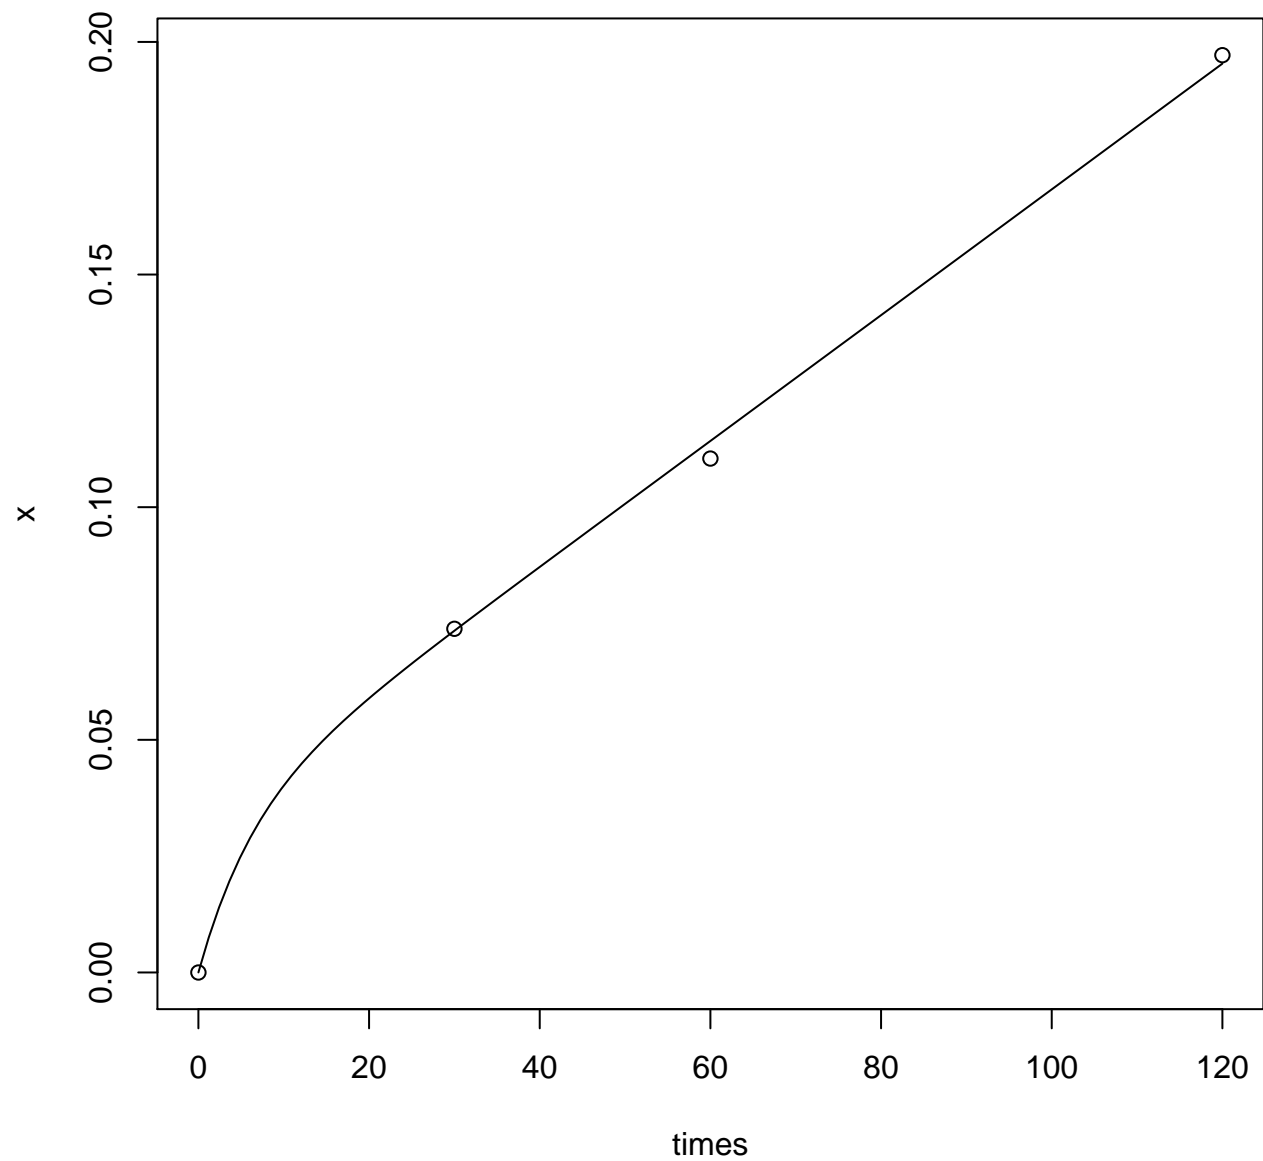

Supplement: s1 [file s1]

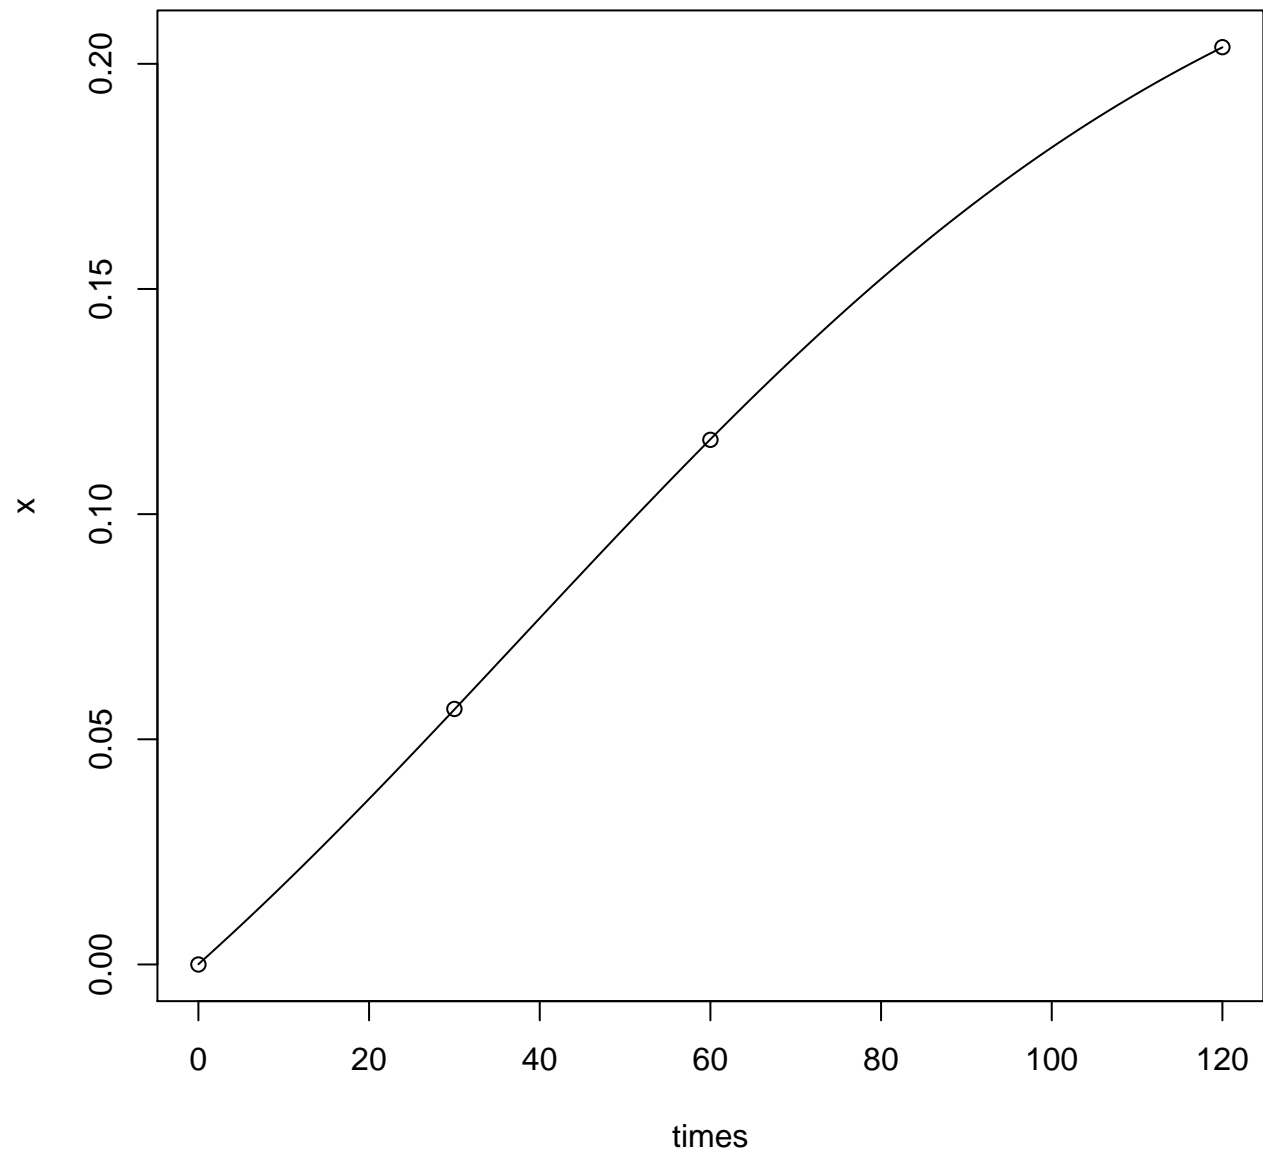

Supplement: s1 [file s1]

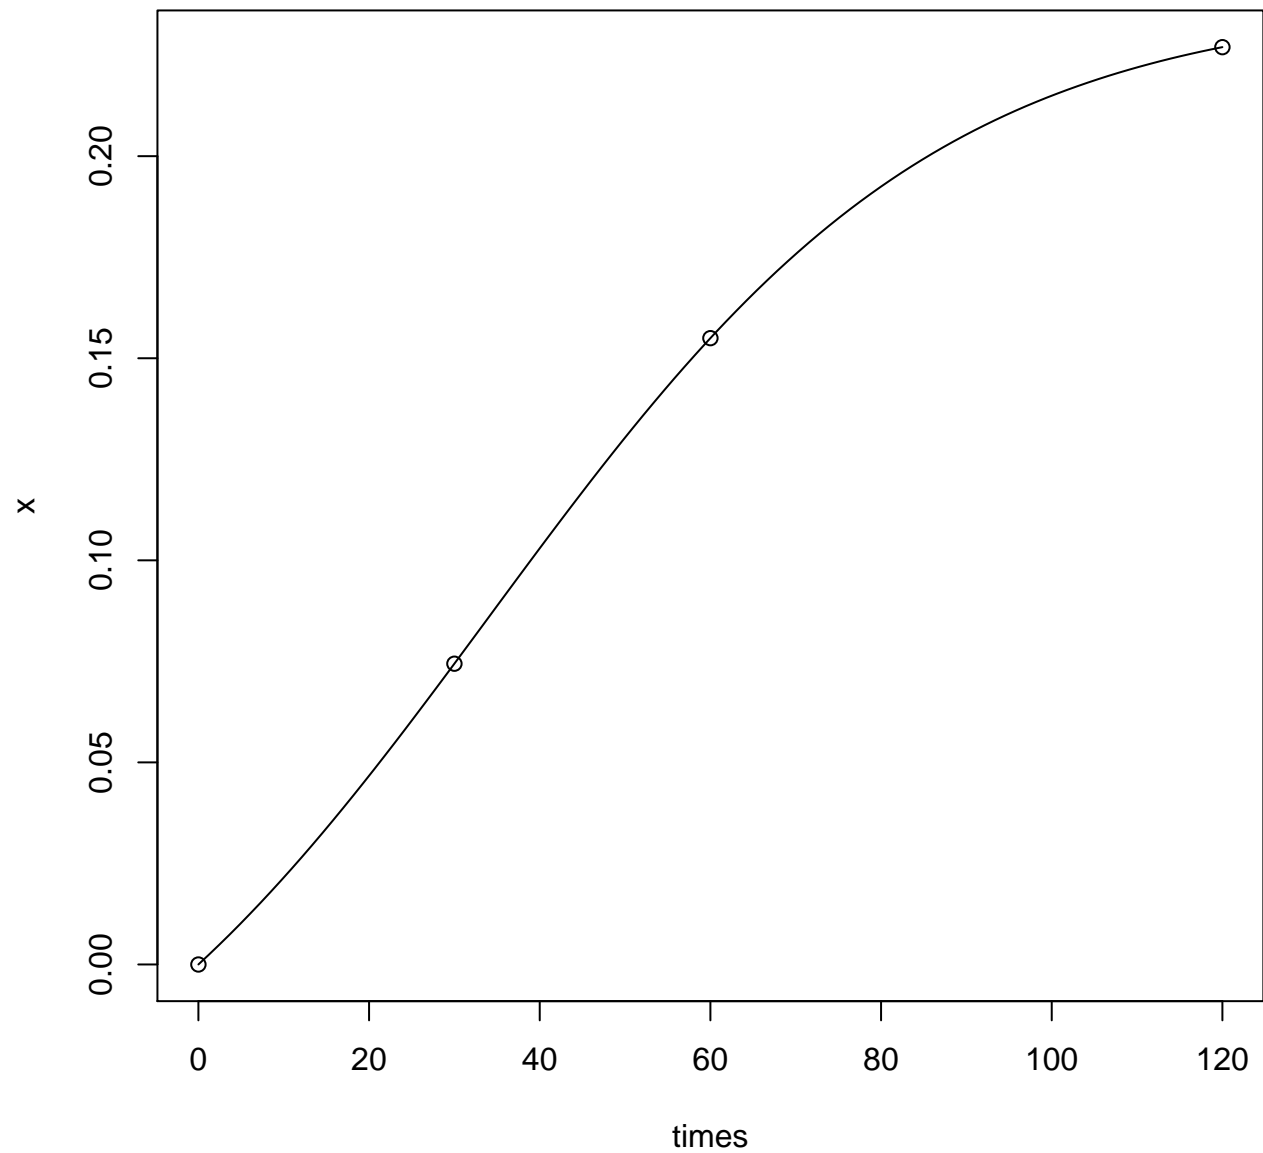

Supplement: s1 [file s1]

## fitting results

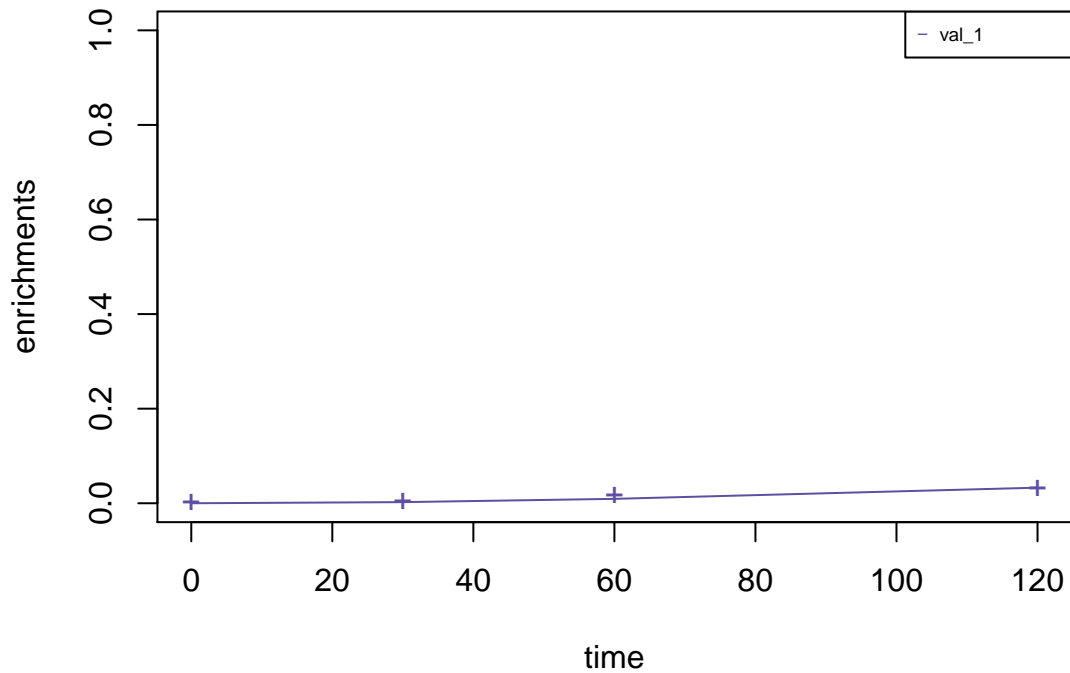

Supplement: s1 [file s1]

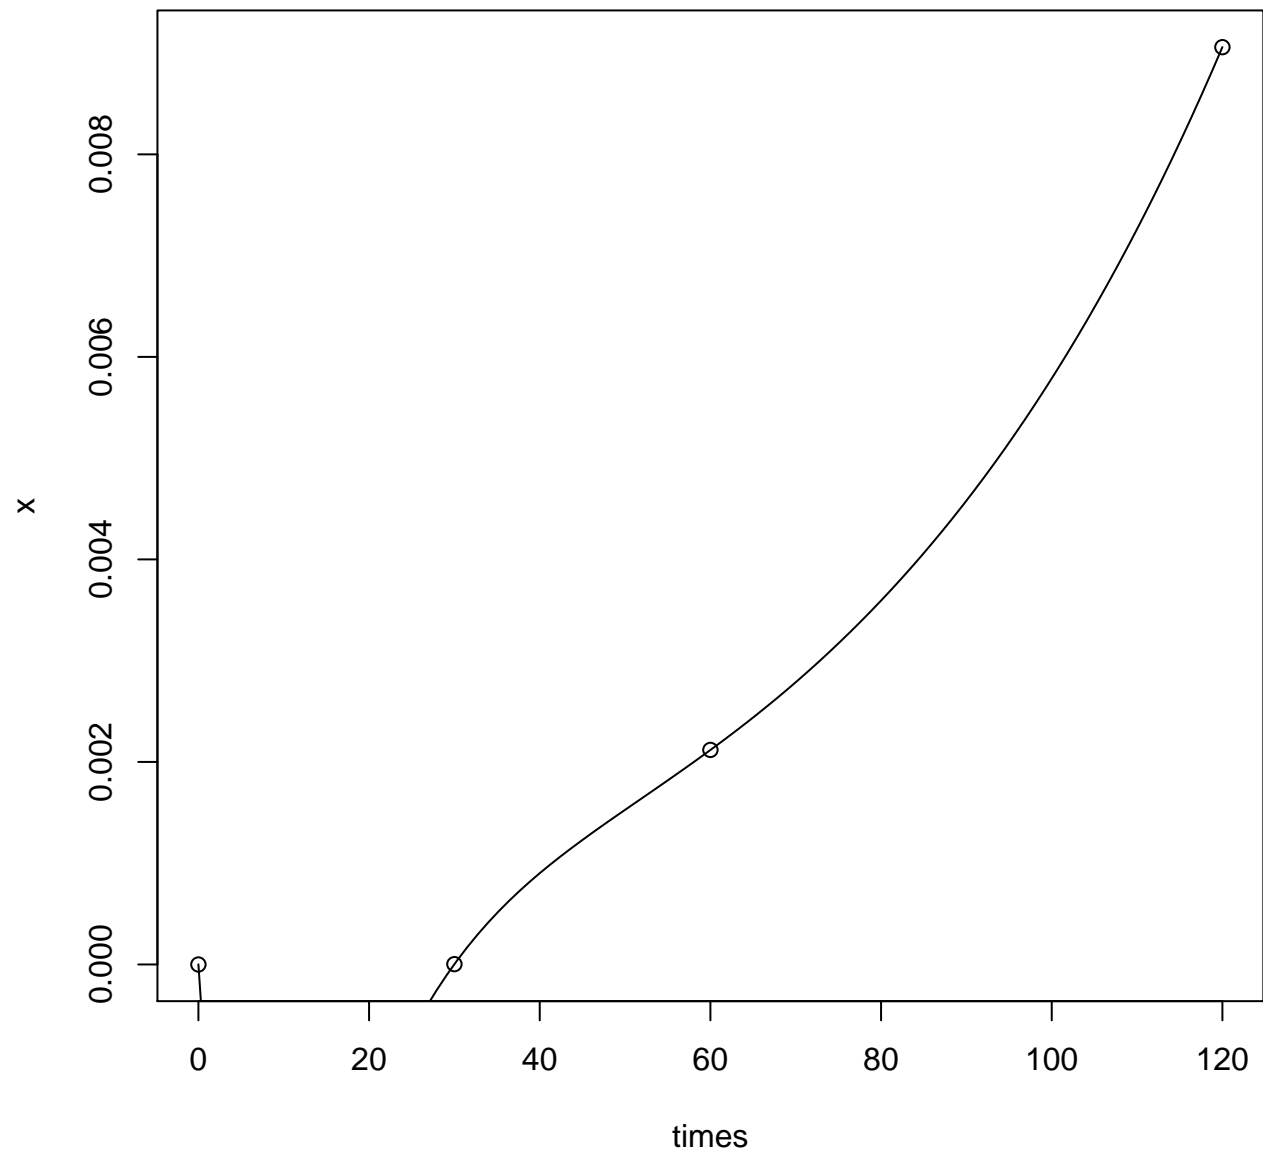

Supplement: s1 [file s1]

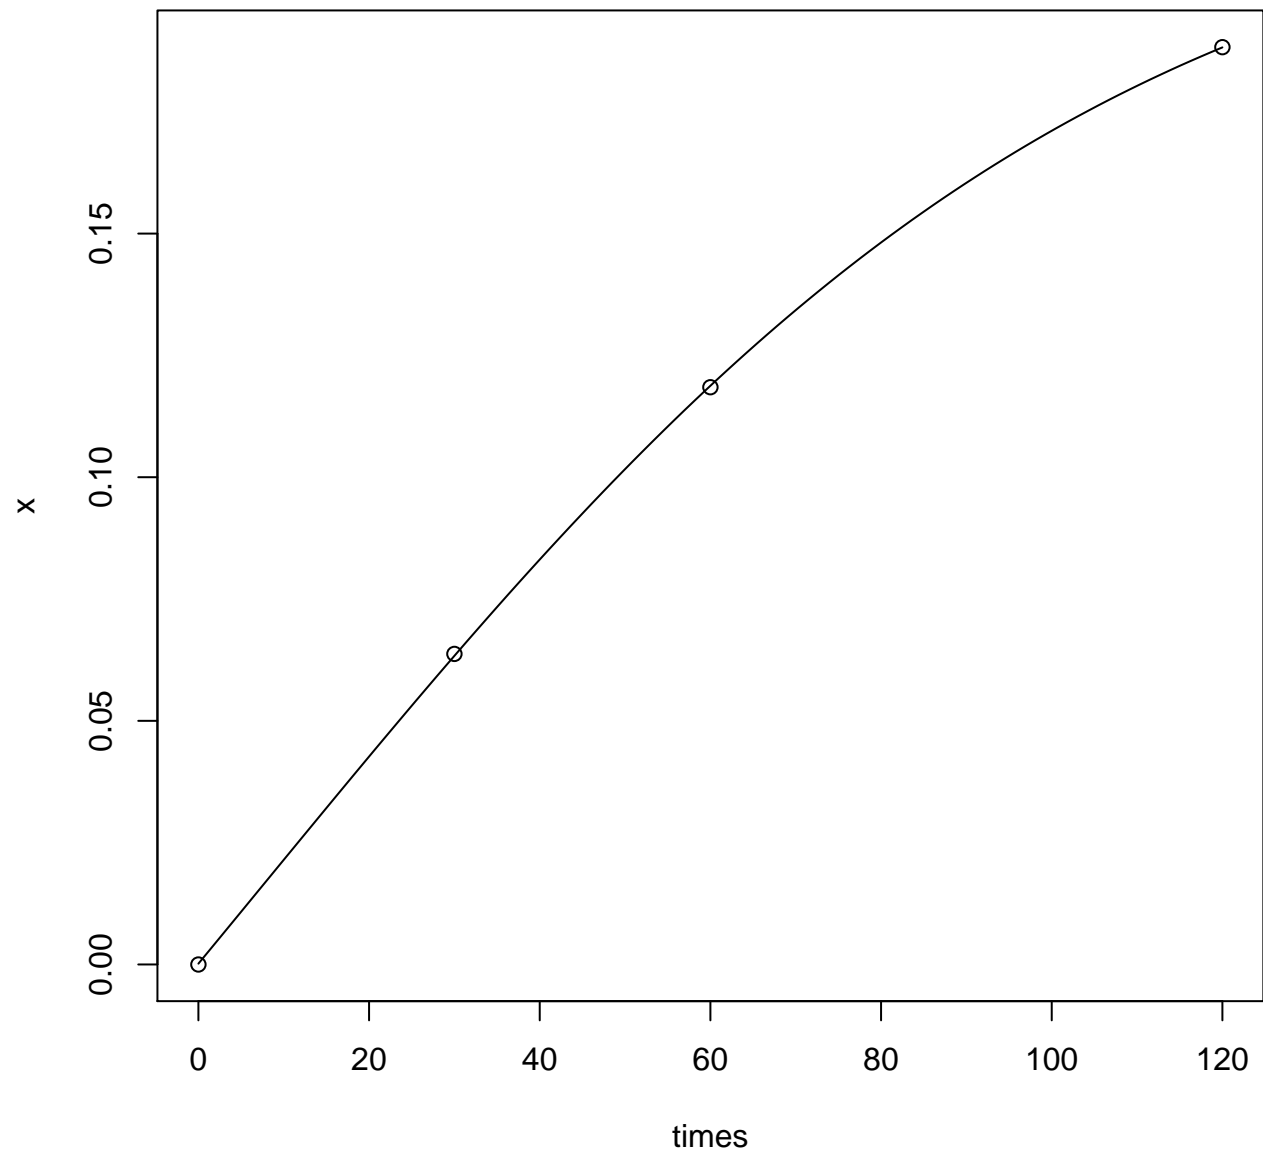

Supplement: s1 [file s1]

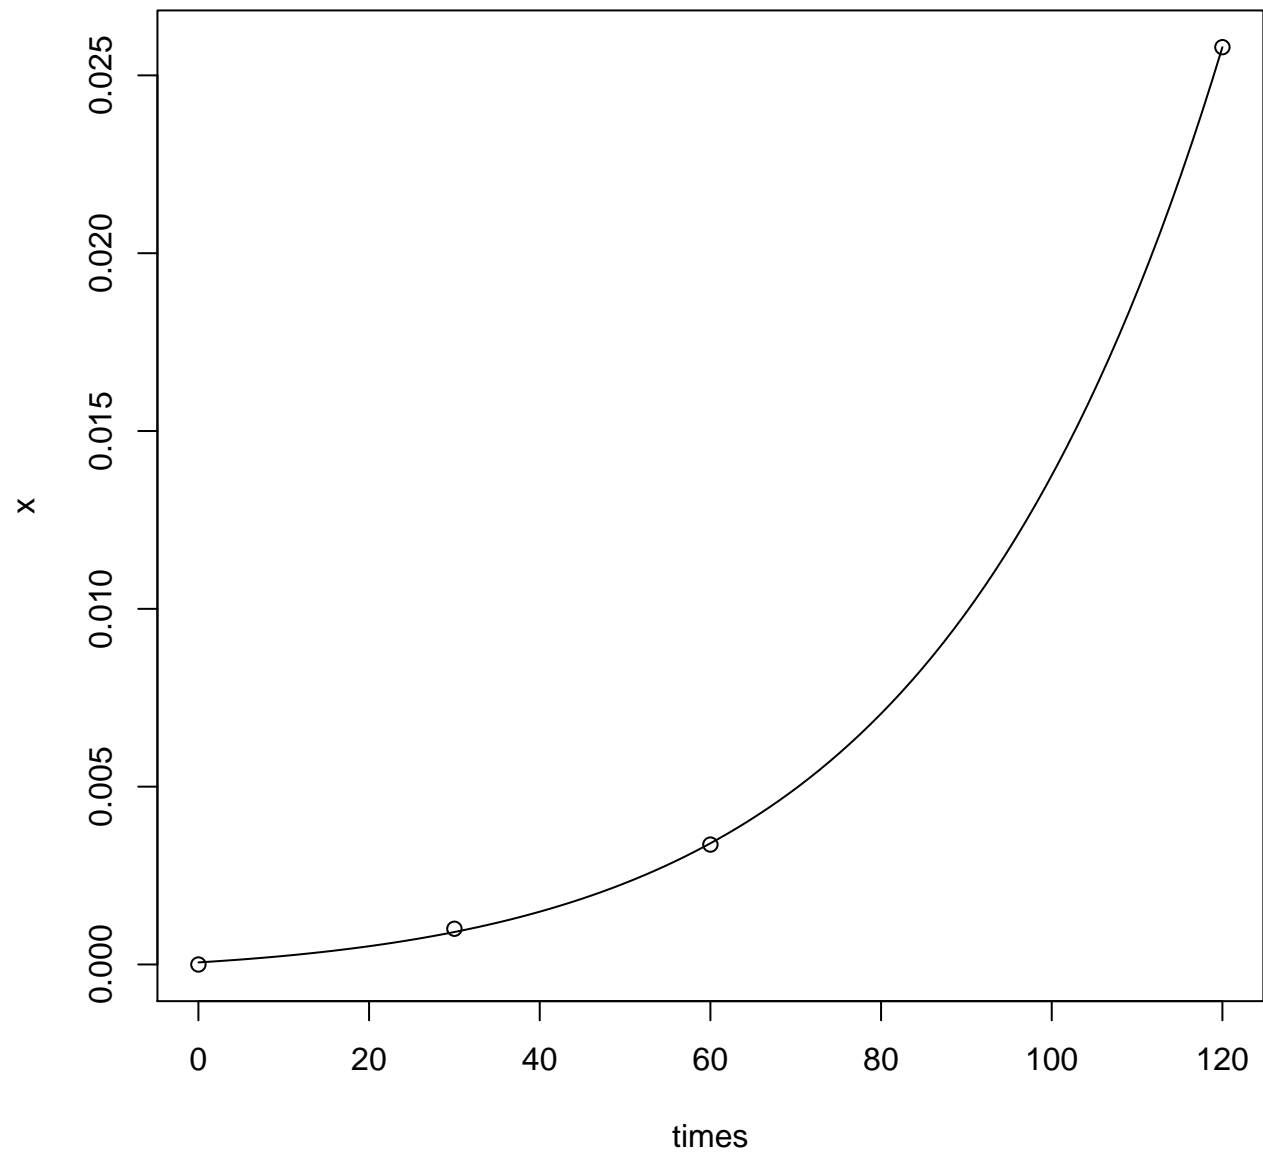

Supplement: s1 [file s1]

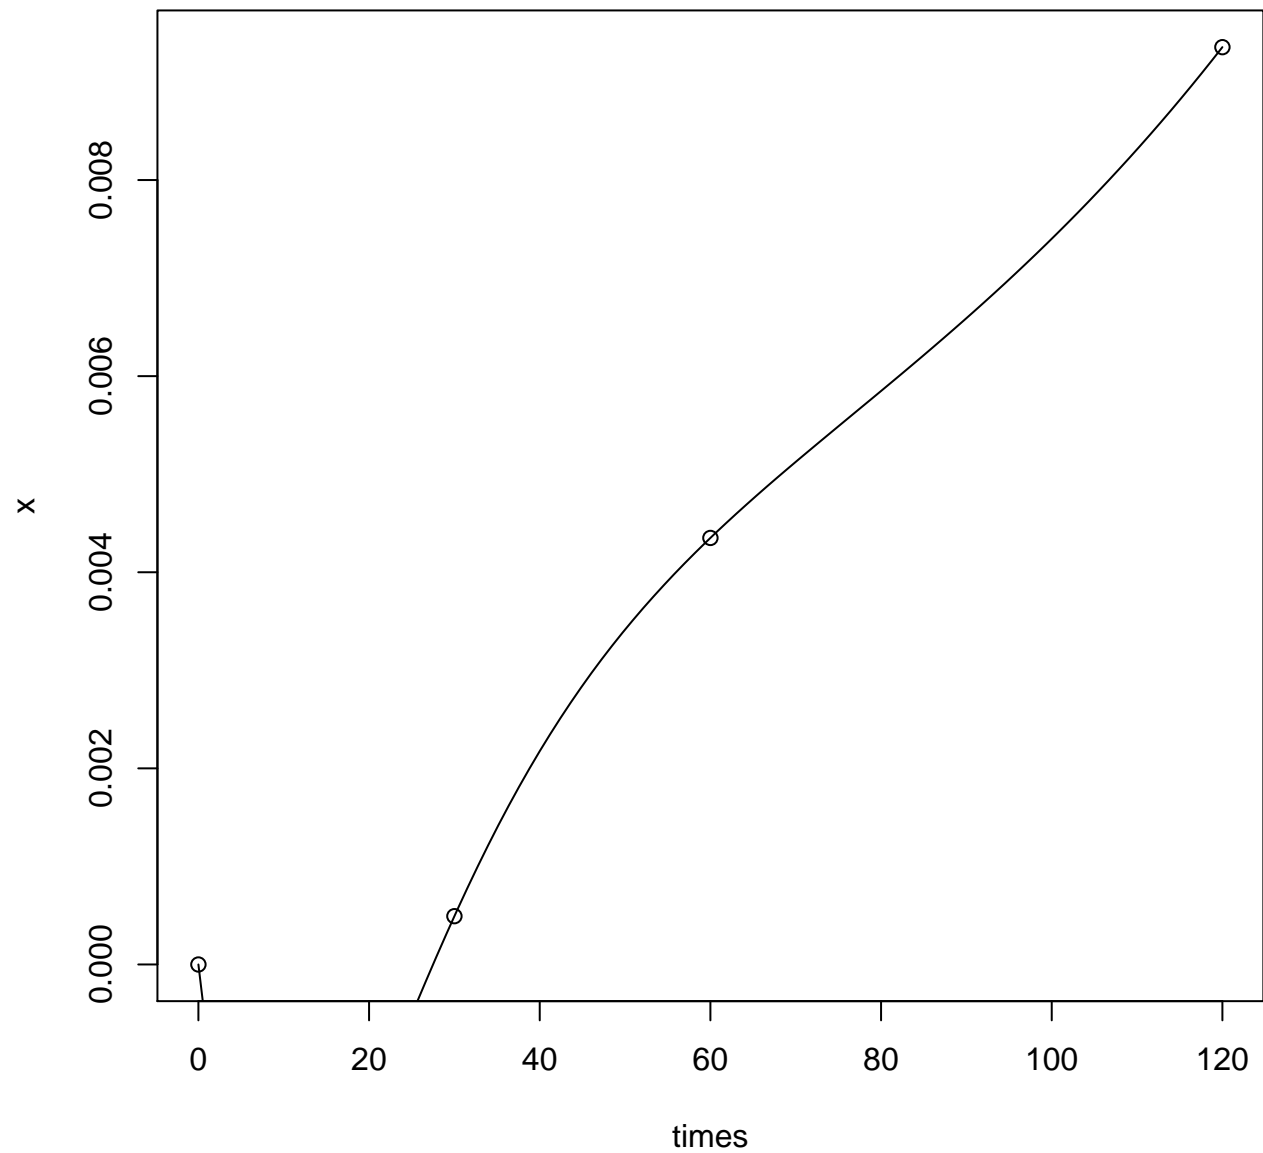

Supplement: s1 [file s1]

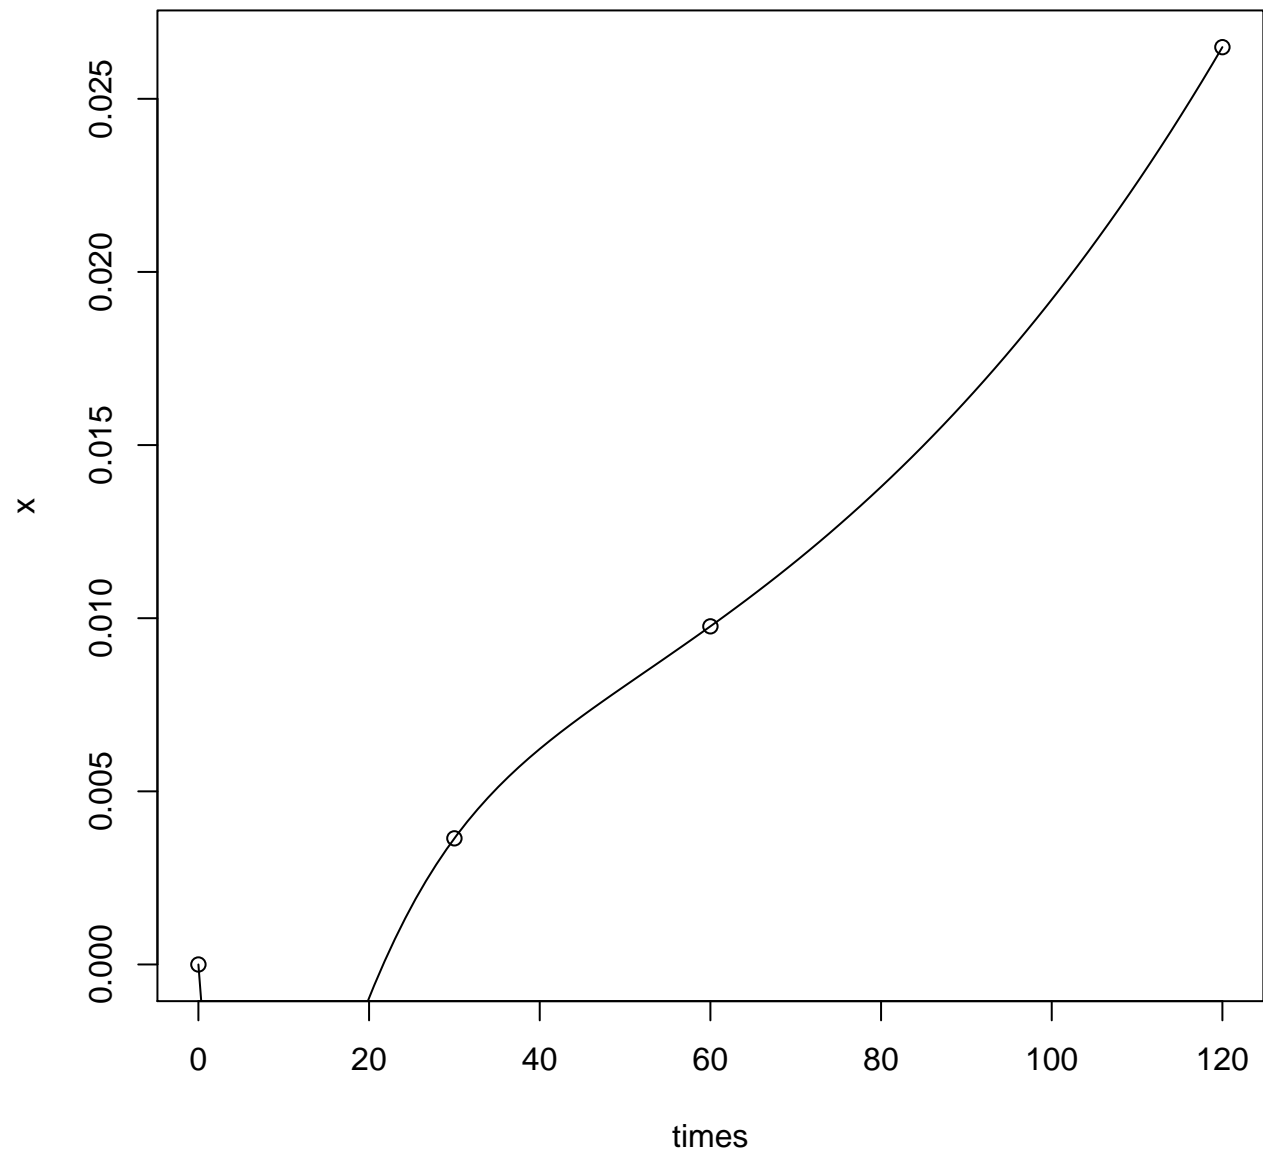

Supplement: s1 [file s1]

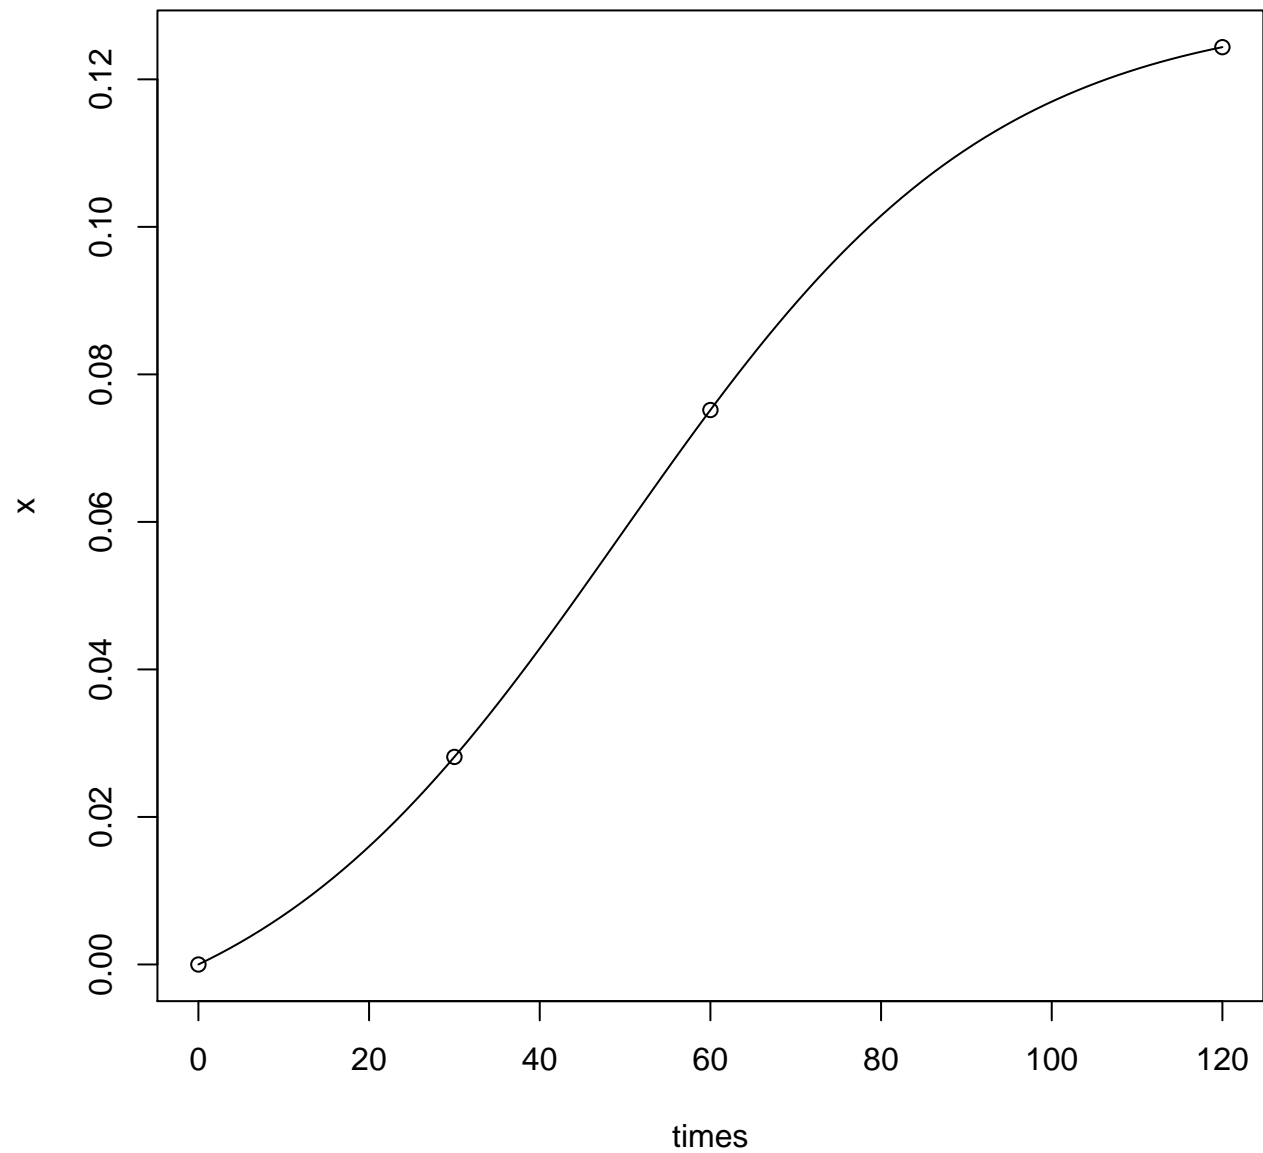

Supplement: s1 [file s1]

## fitting results

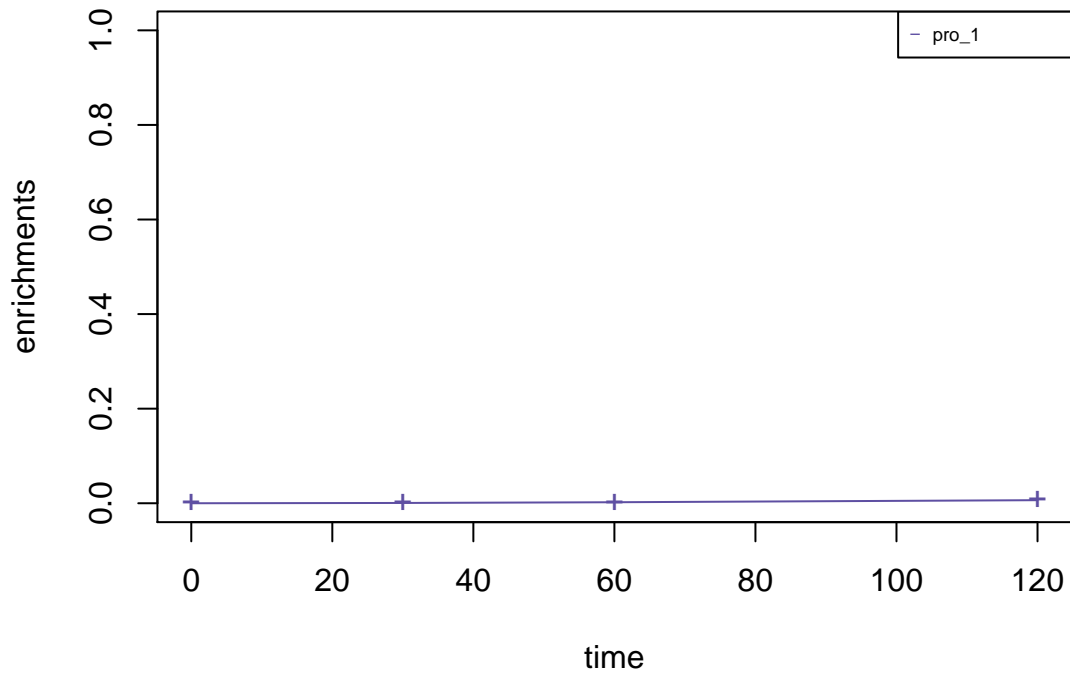

Supplement: s1 [file s1]

## fitting results

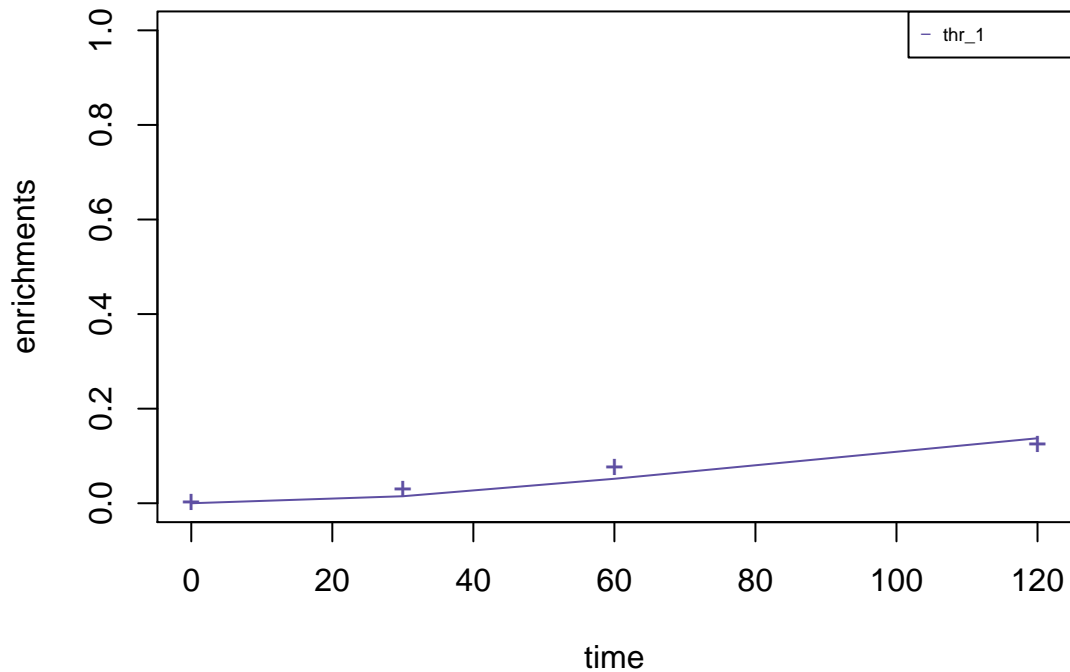

Supplement: s1 [file s1]

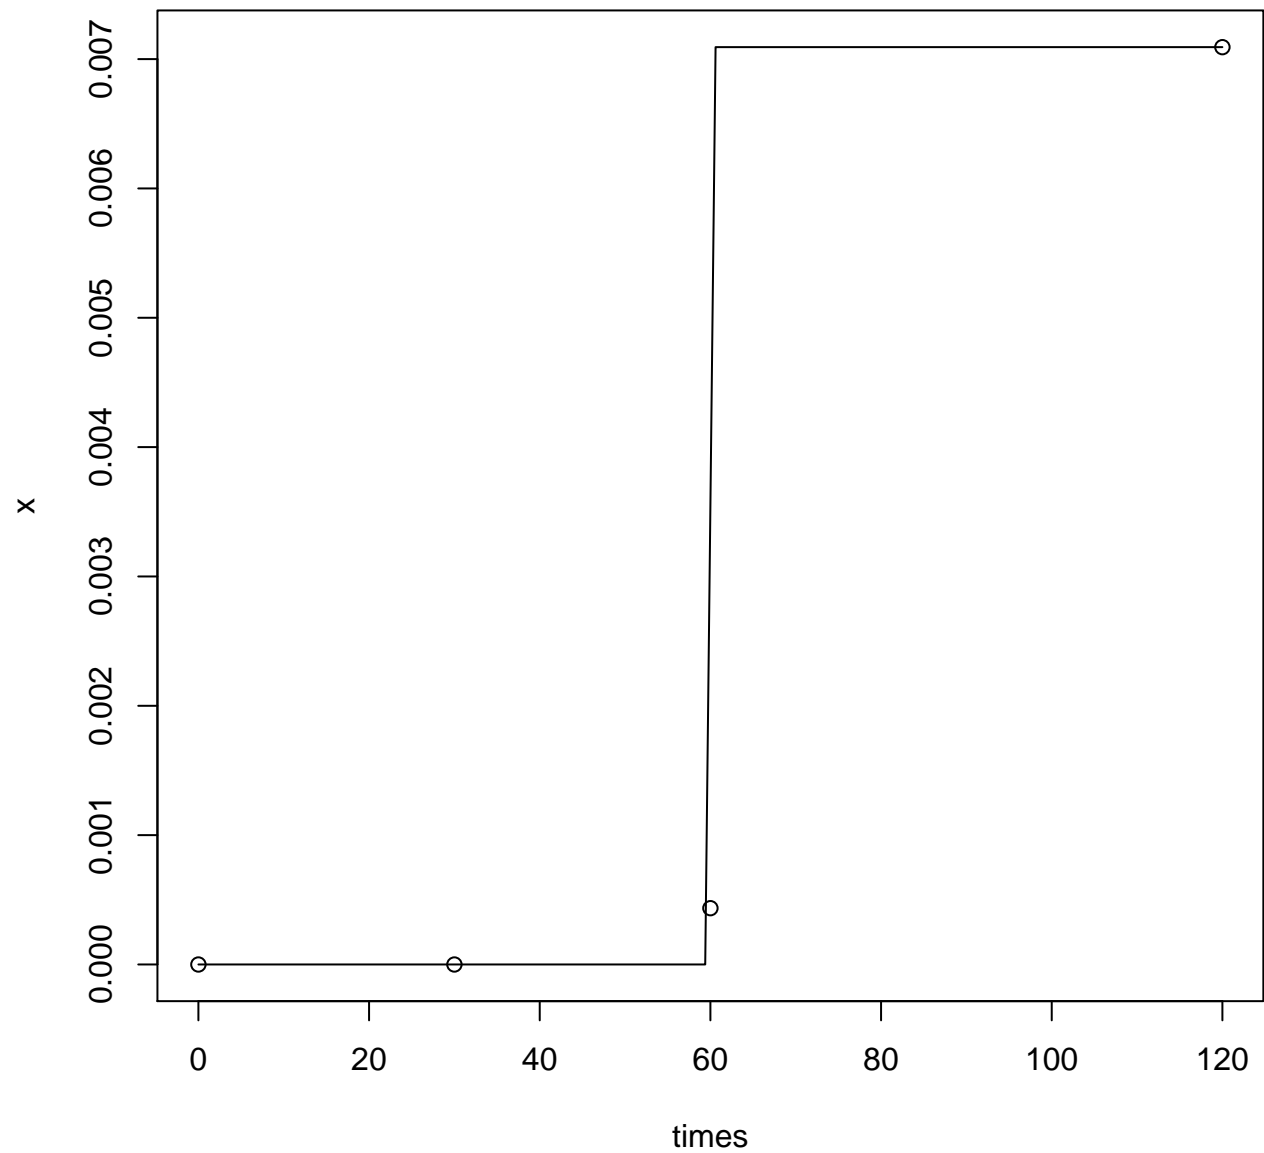

Supplement: s1 [file s1]

## fitting results

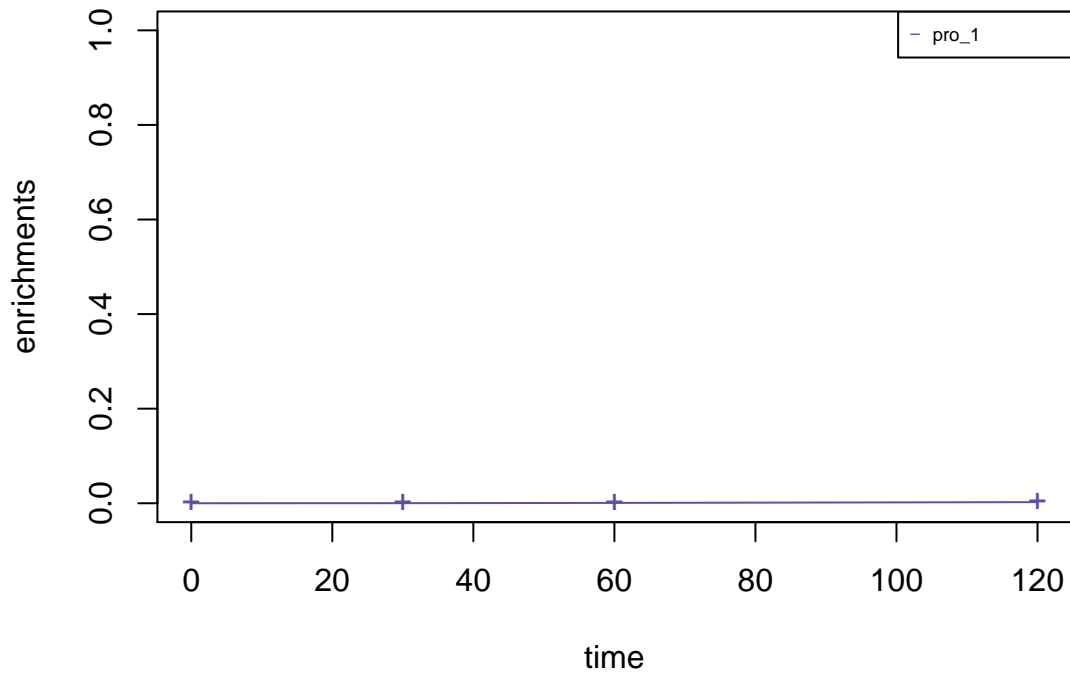

Supplement: s1 [file s1]

## fitting results

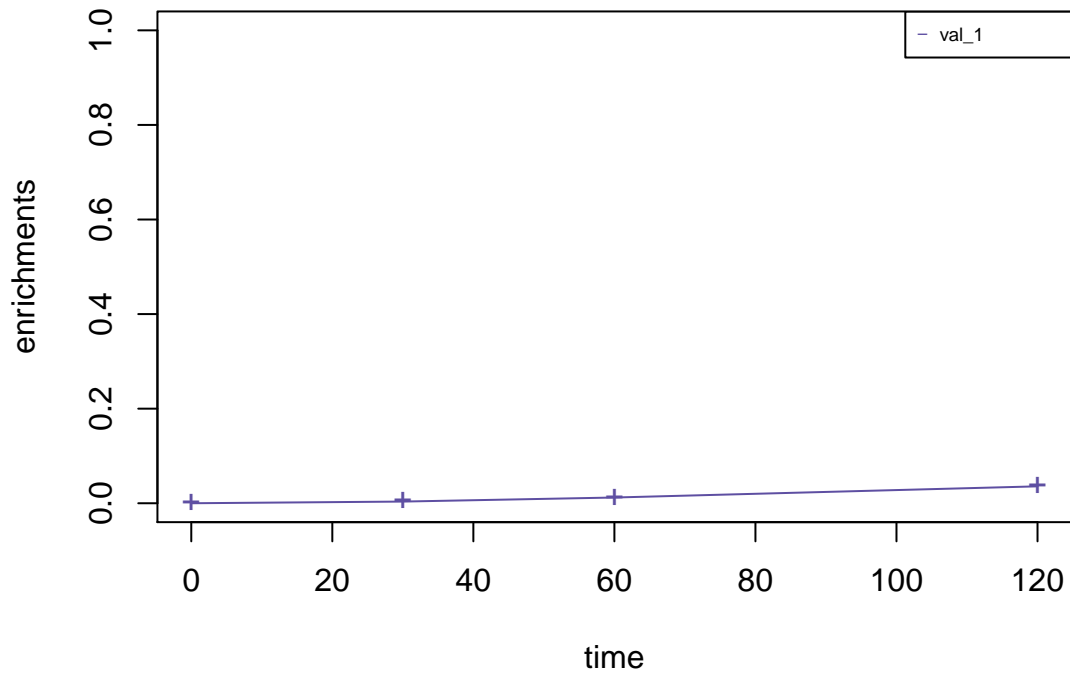

Supplement: s1 [file s1]

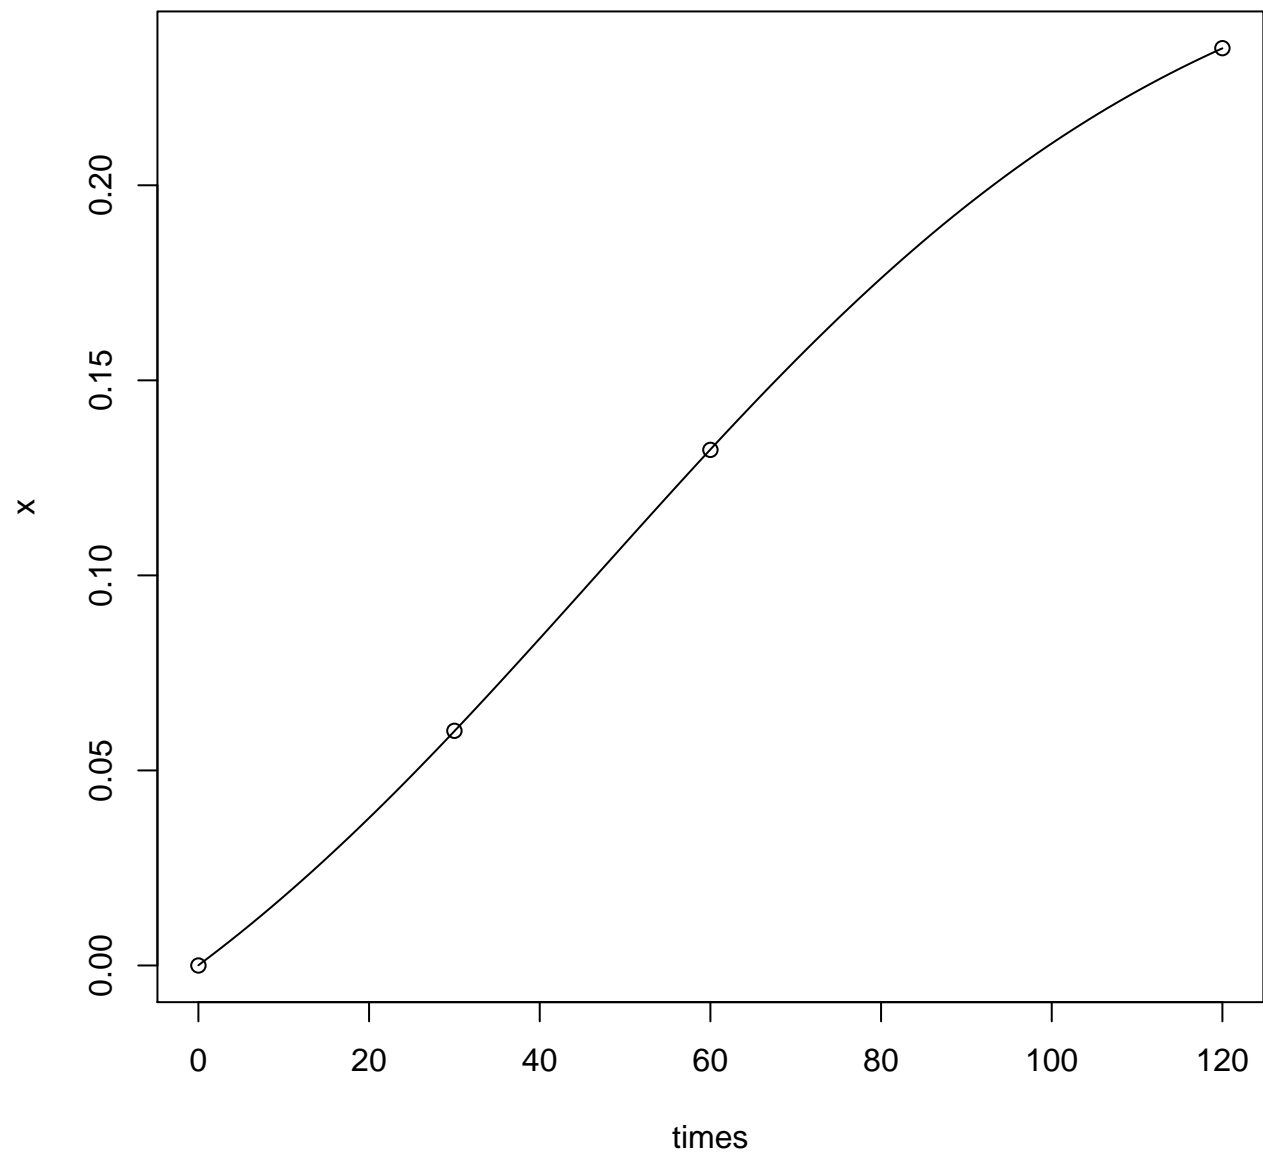

Supplement: s1 [file s1]

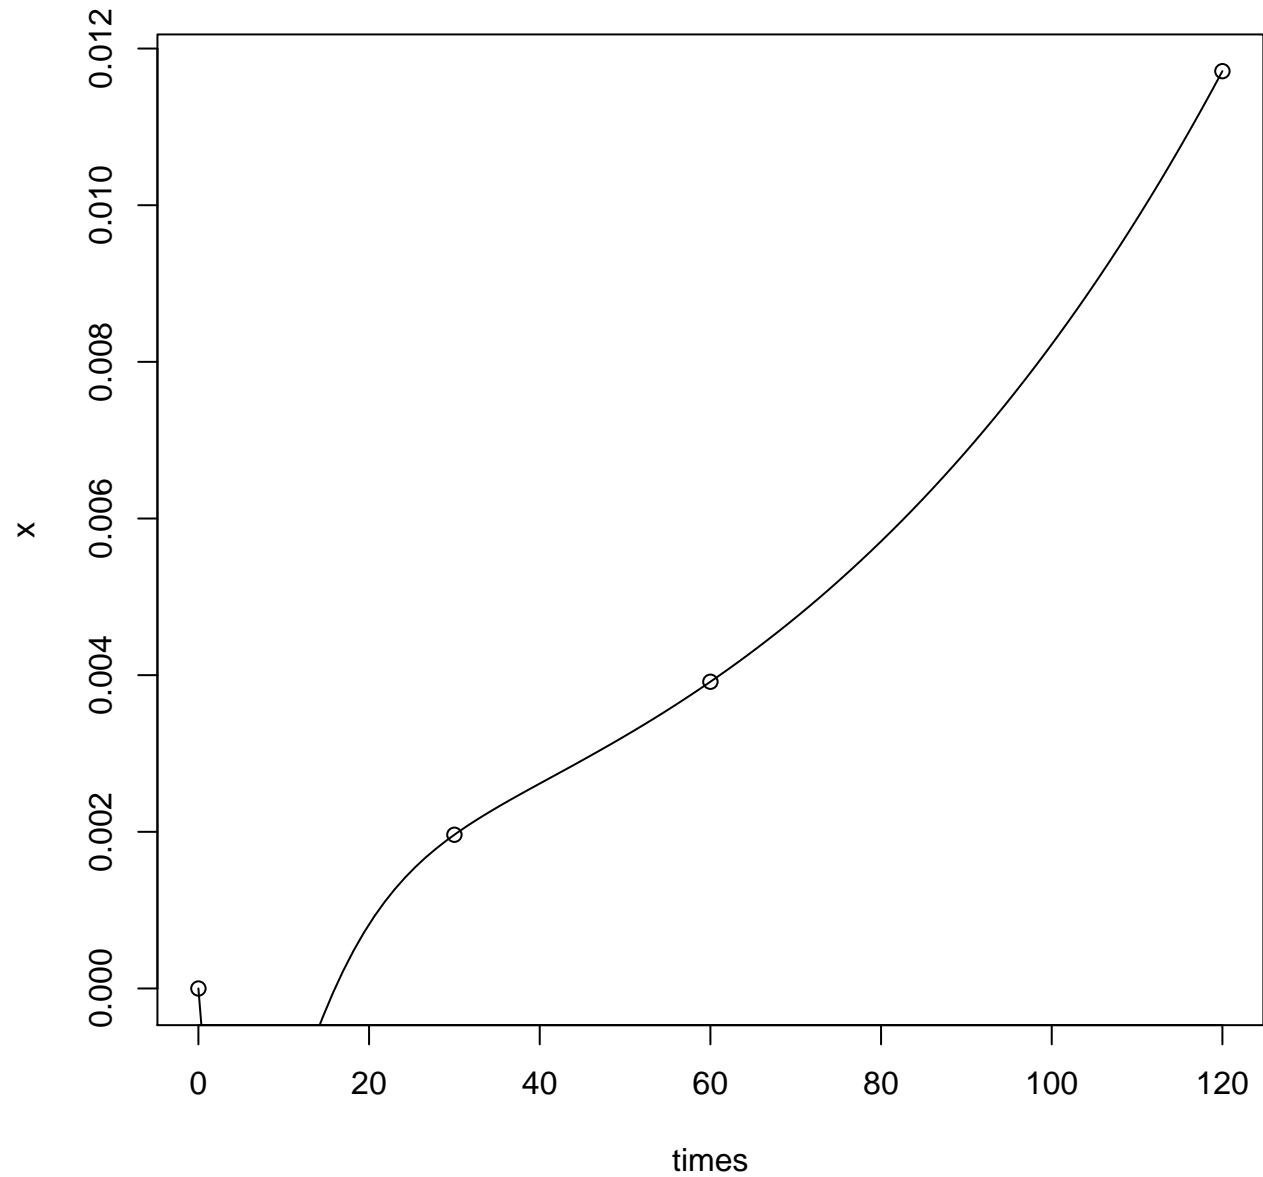

Supplement: s1 [file s1]

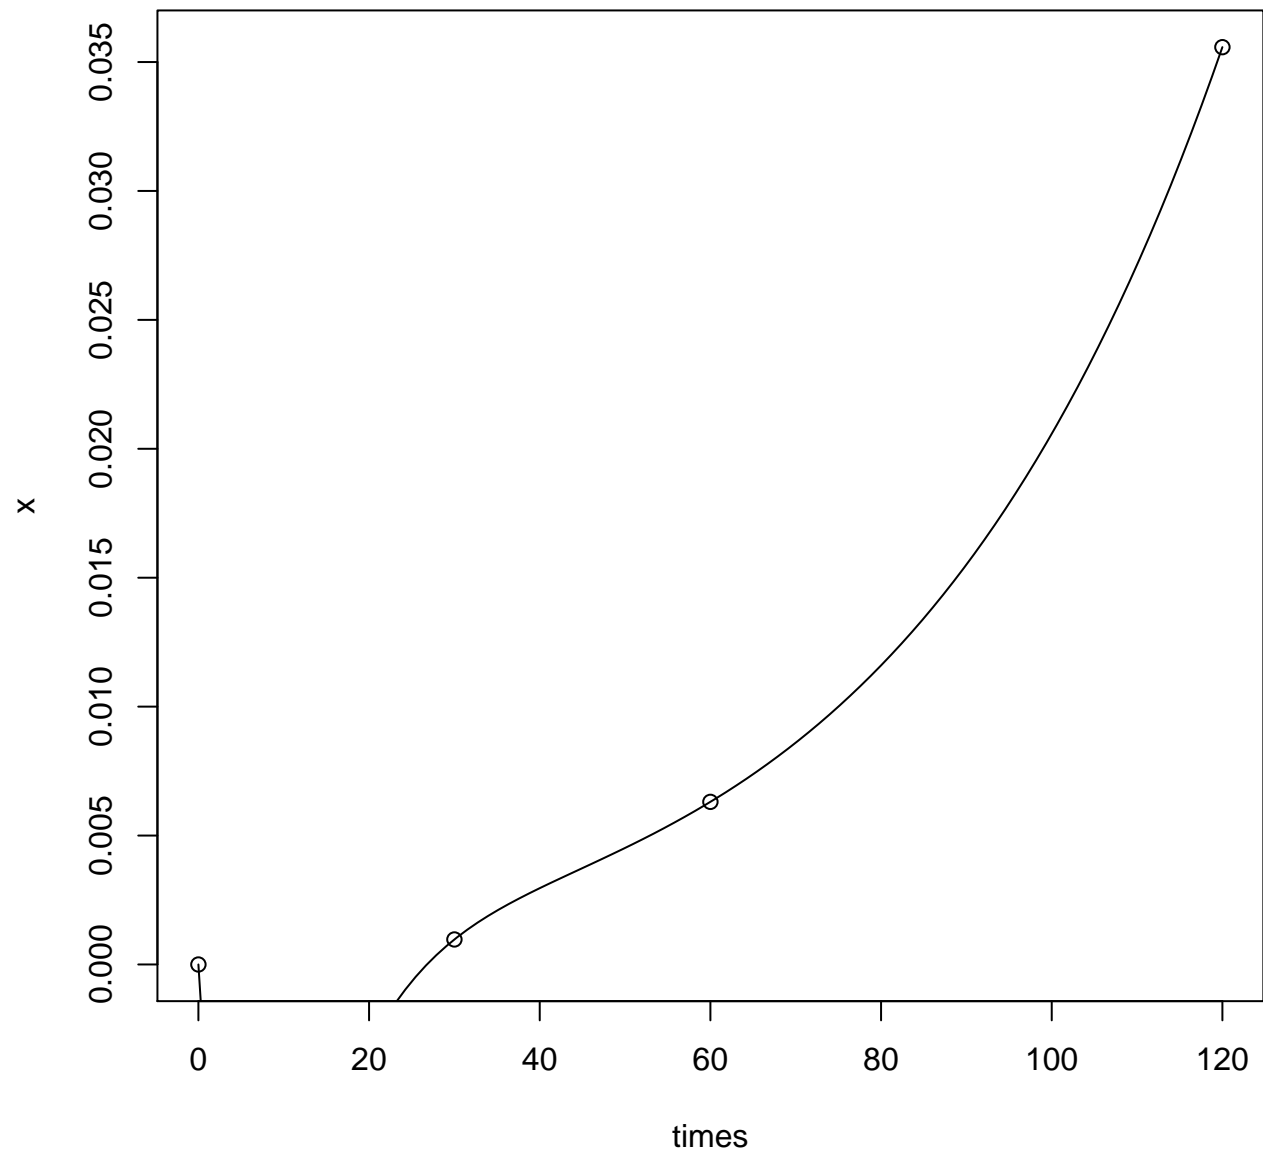

Supplement: s1 [file s1]

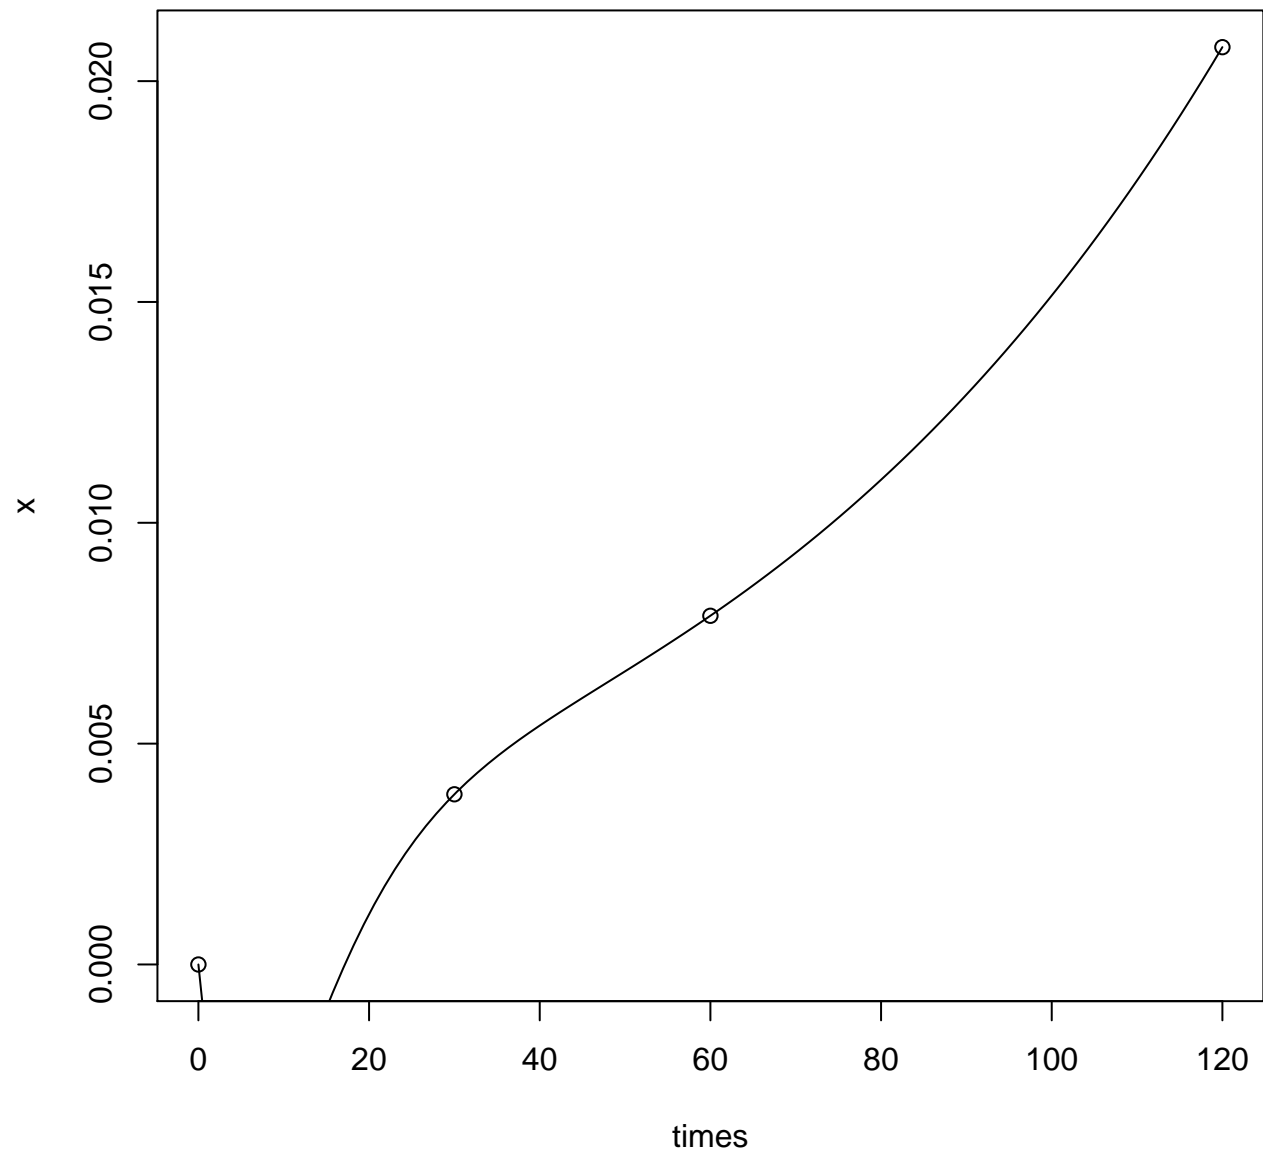

Supplement: s1 [file s1]

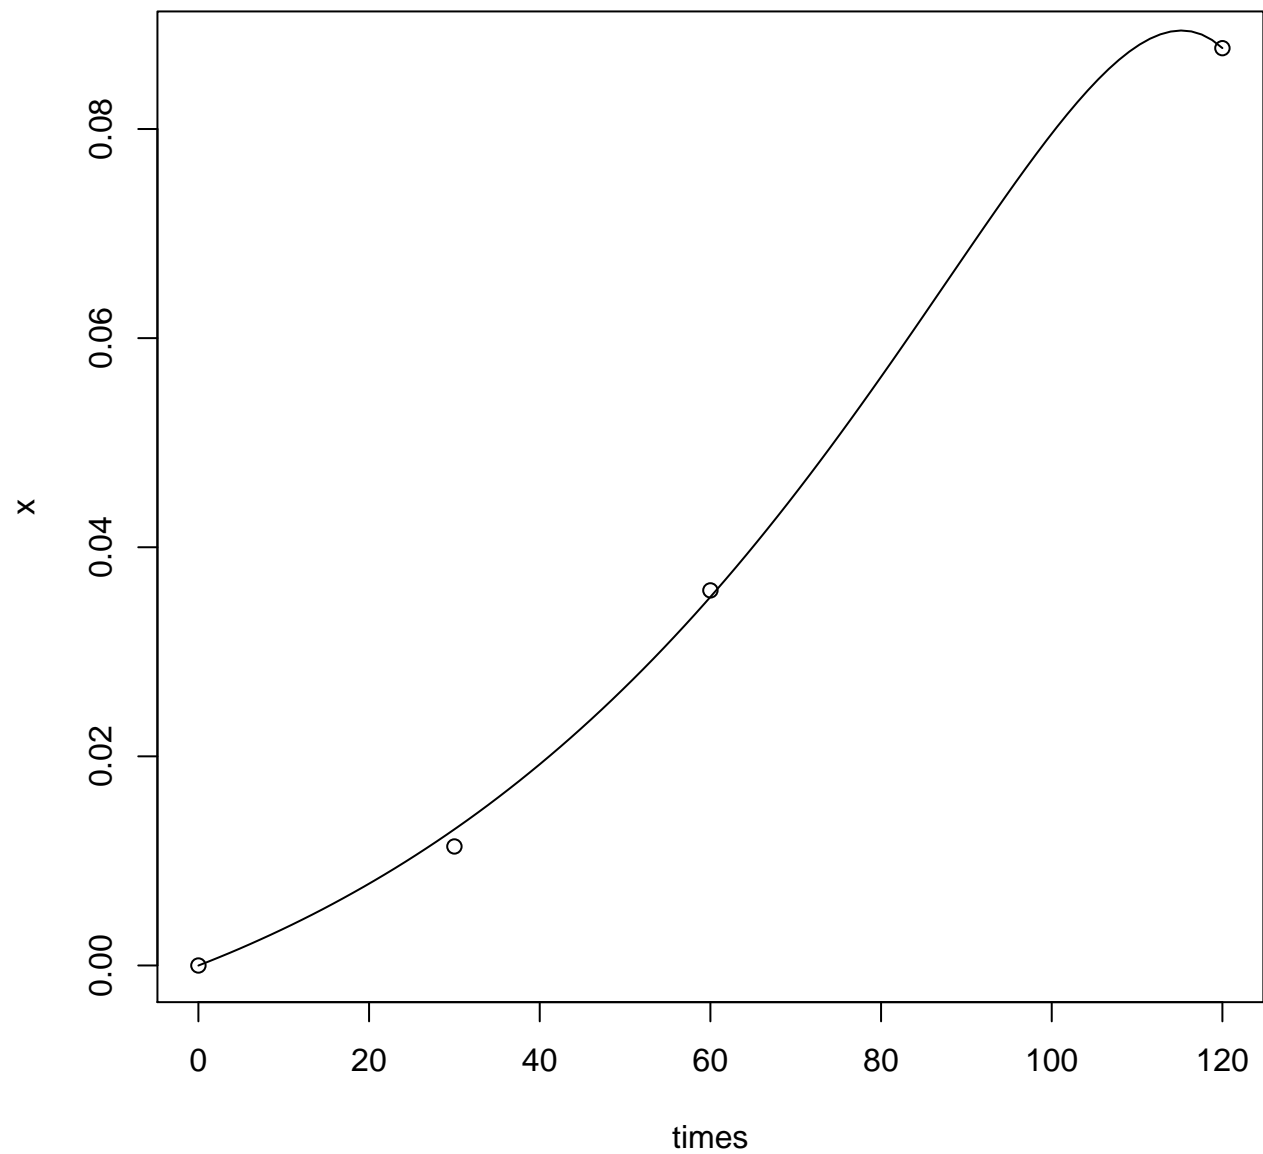

Supplement: s1 [file s1]

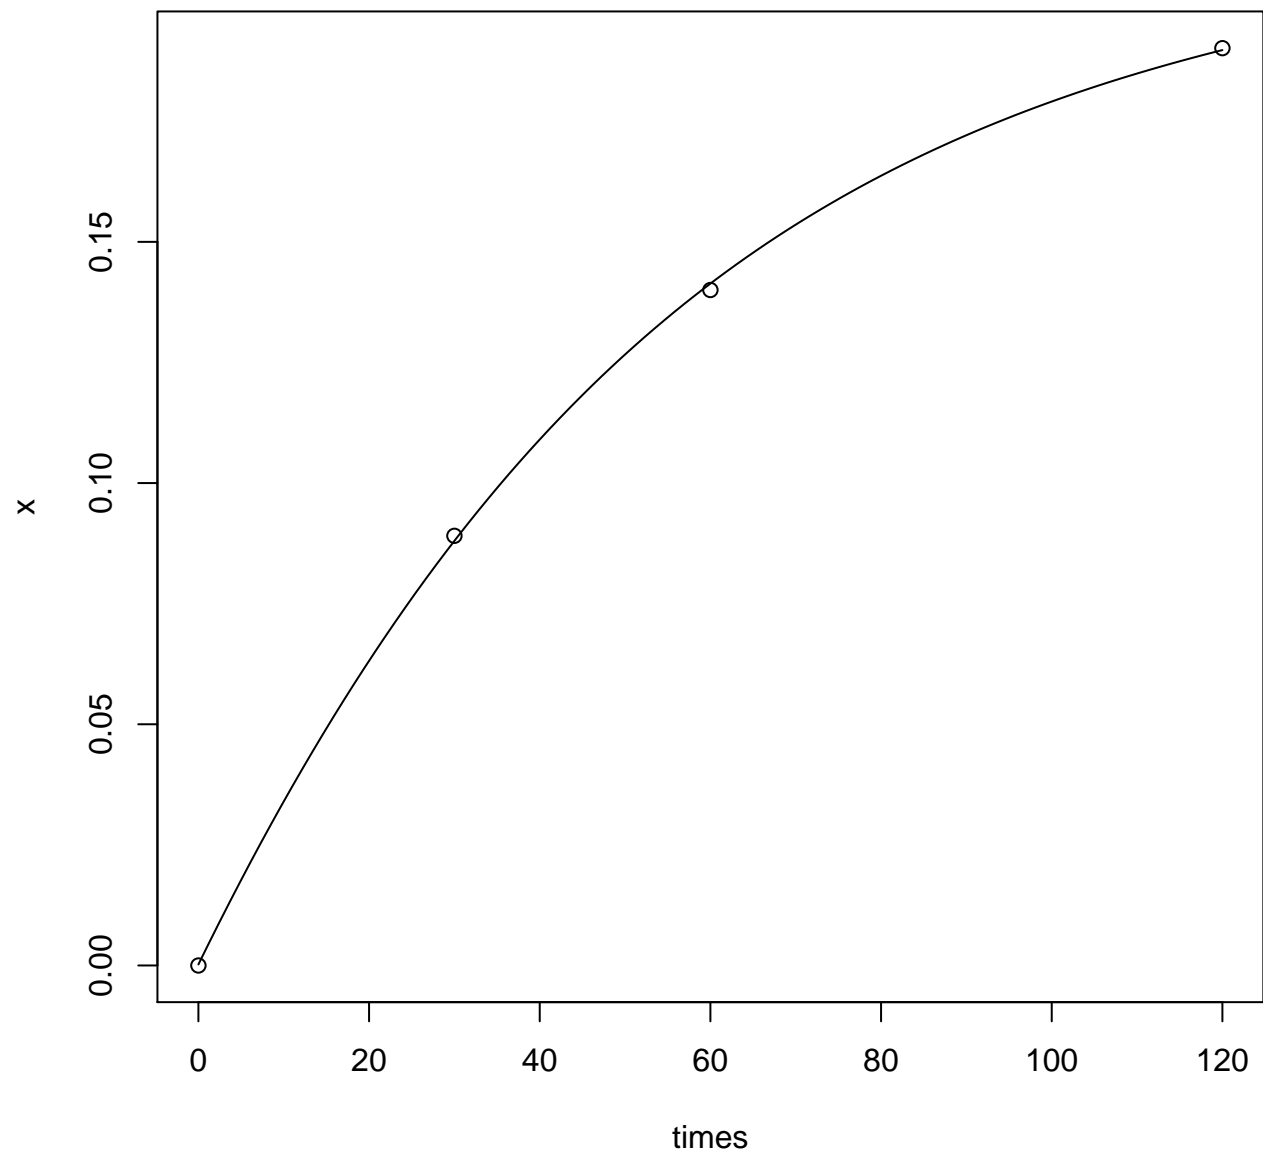

Supplement: s1 [file s1]

## fitting results

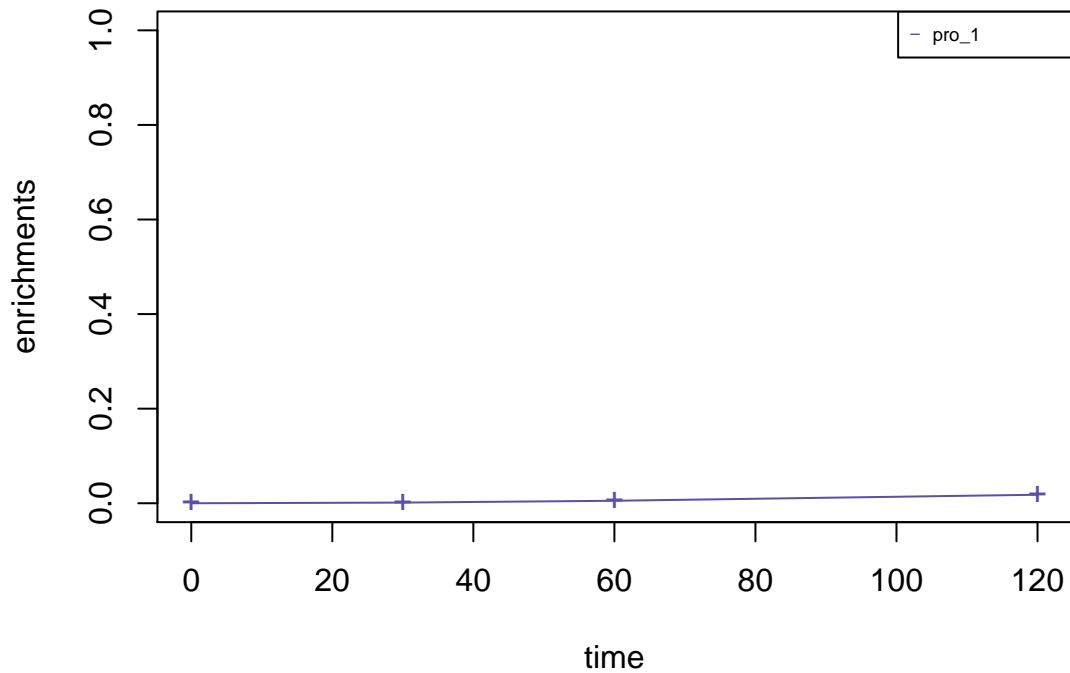

Supplement: s1 [file s1]

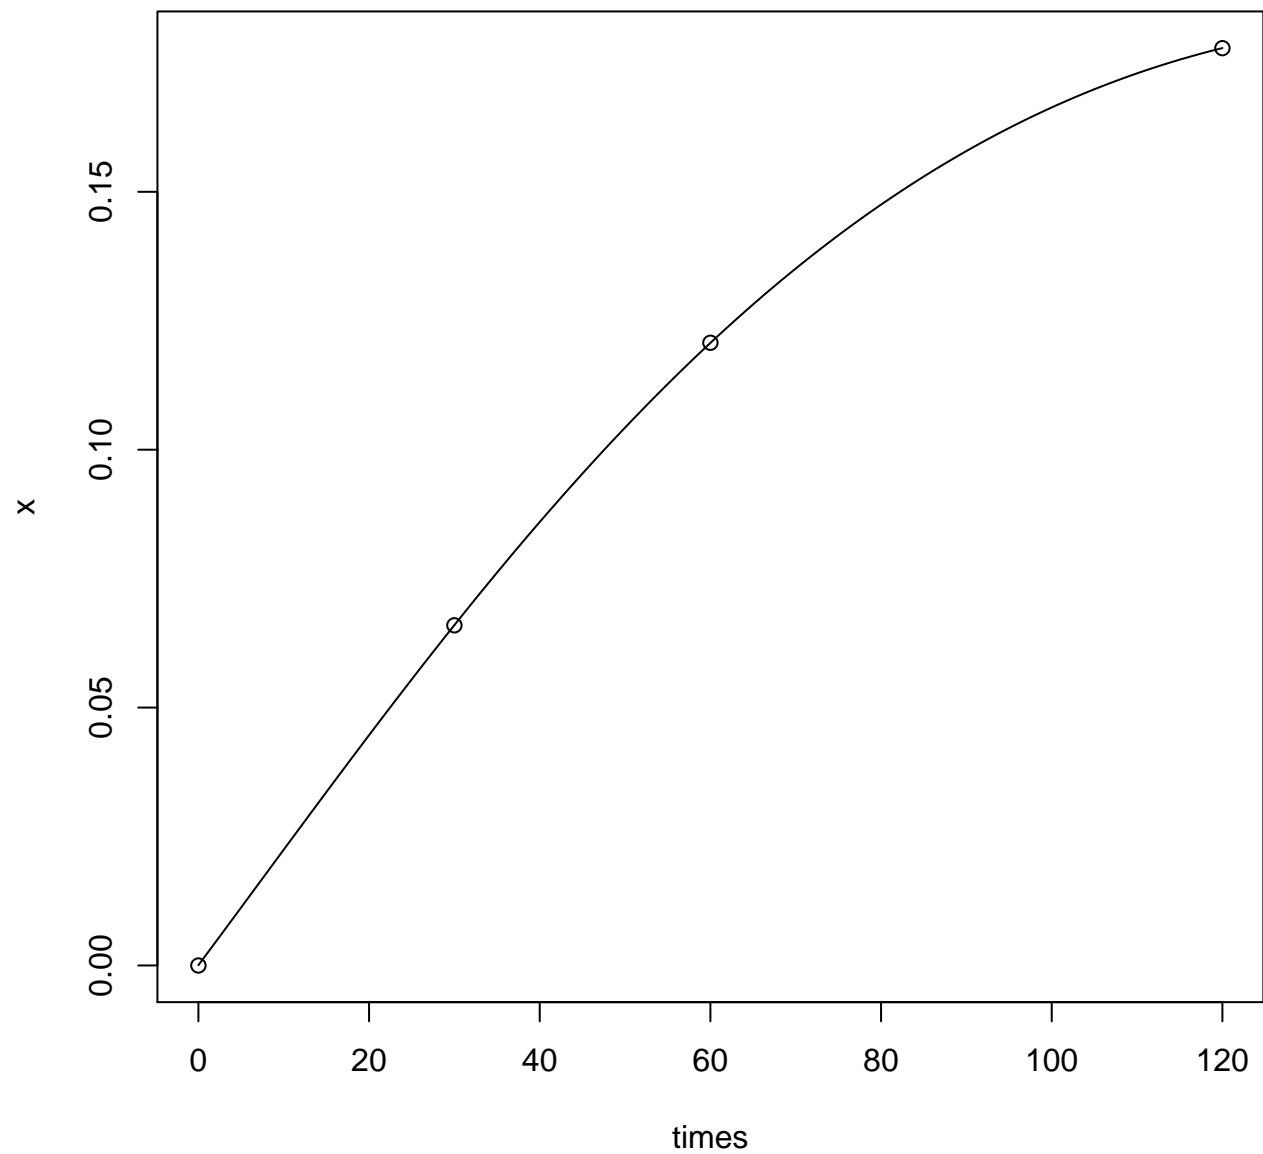

Supplement: s1 [file s1]

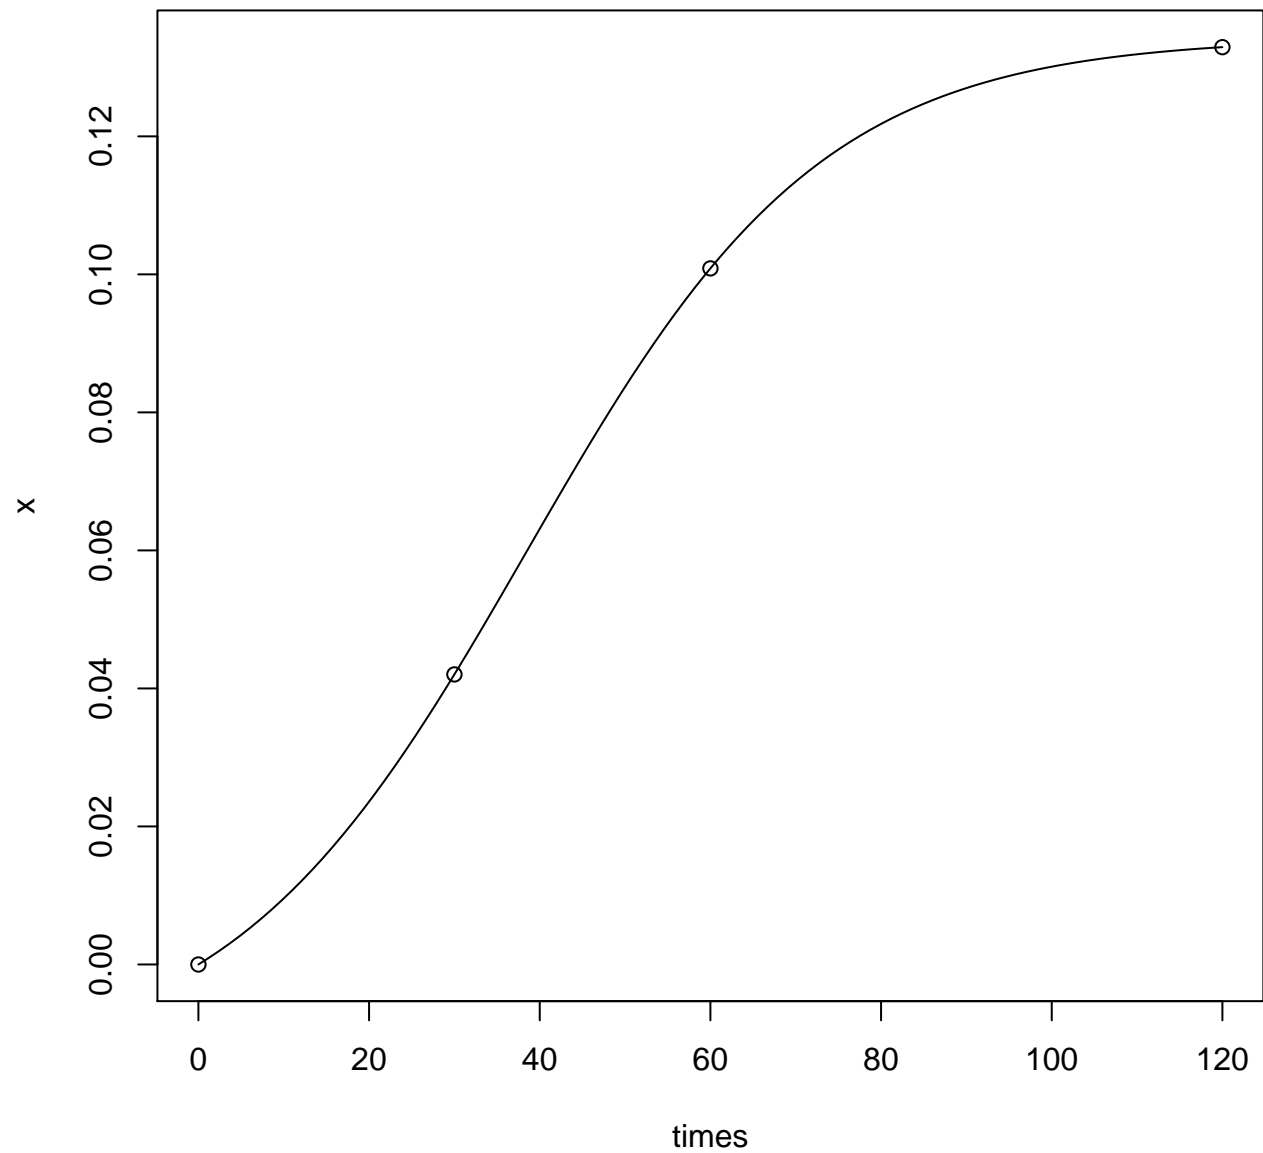

Supplement: s1 [file s1]

## fitting results

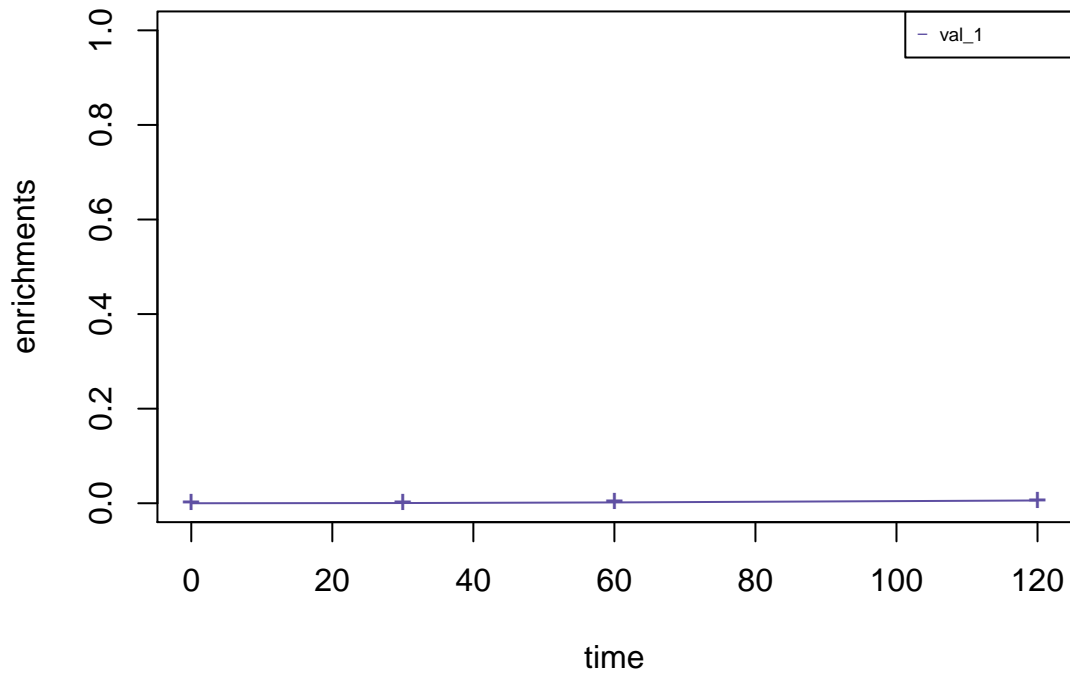

Supplement: s1 [file s1]

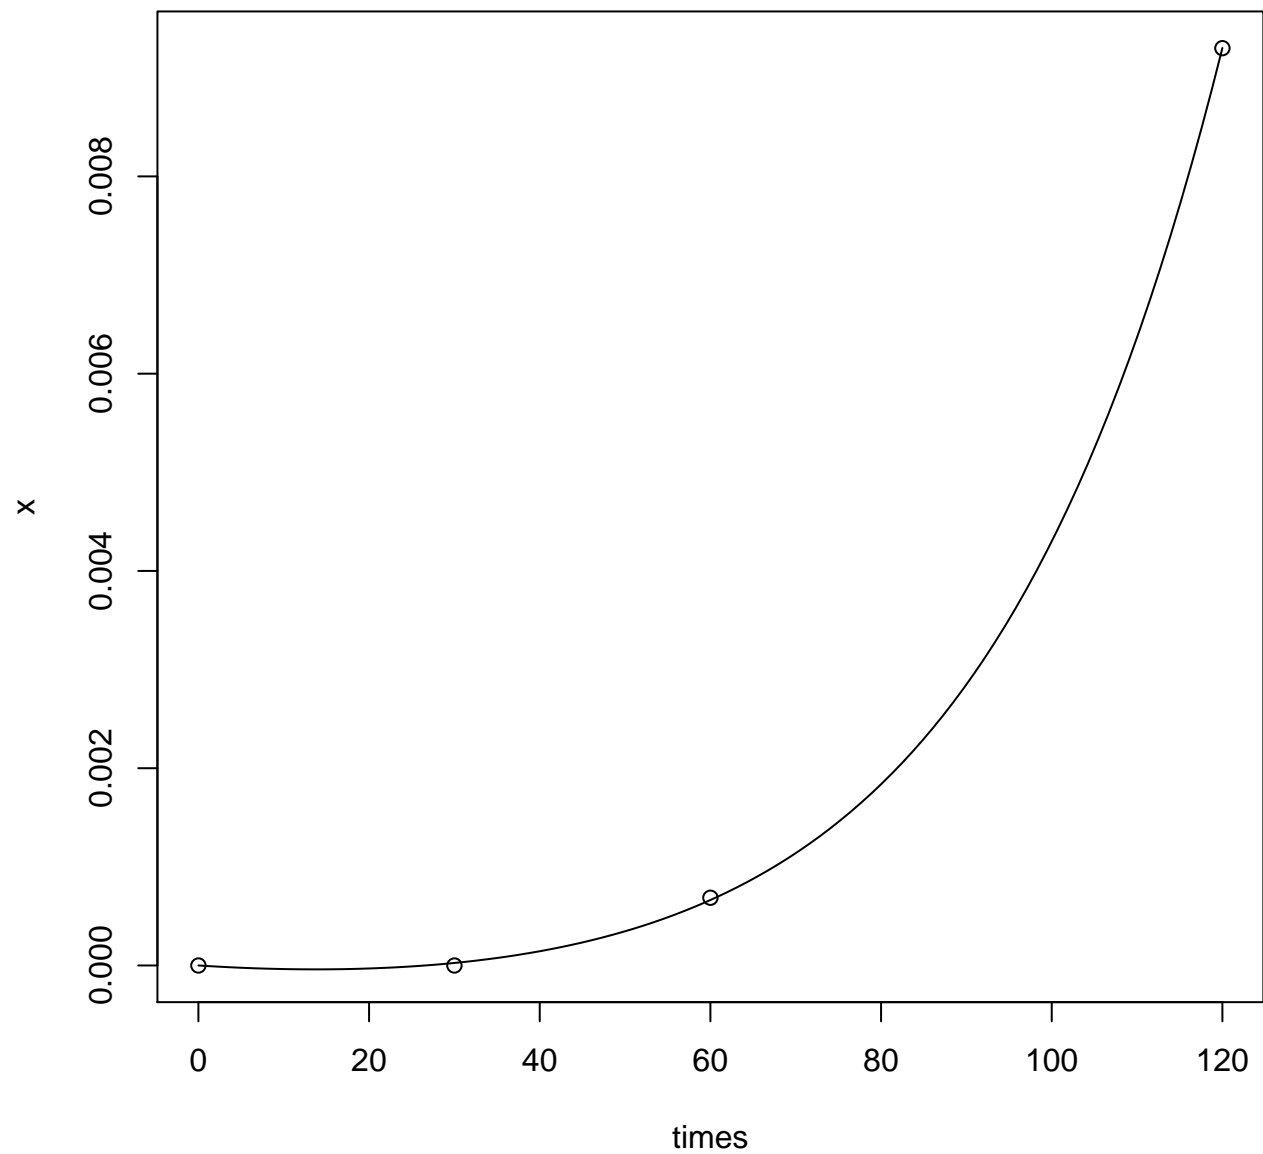

Supplement: s1 [file s1]

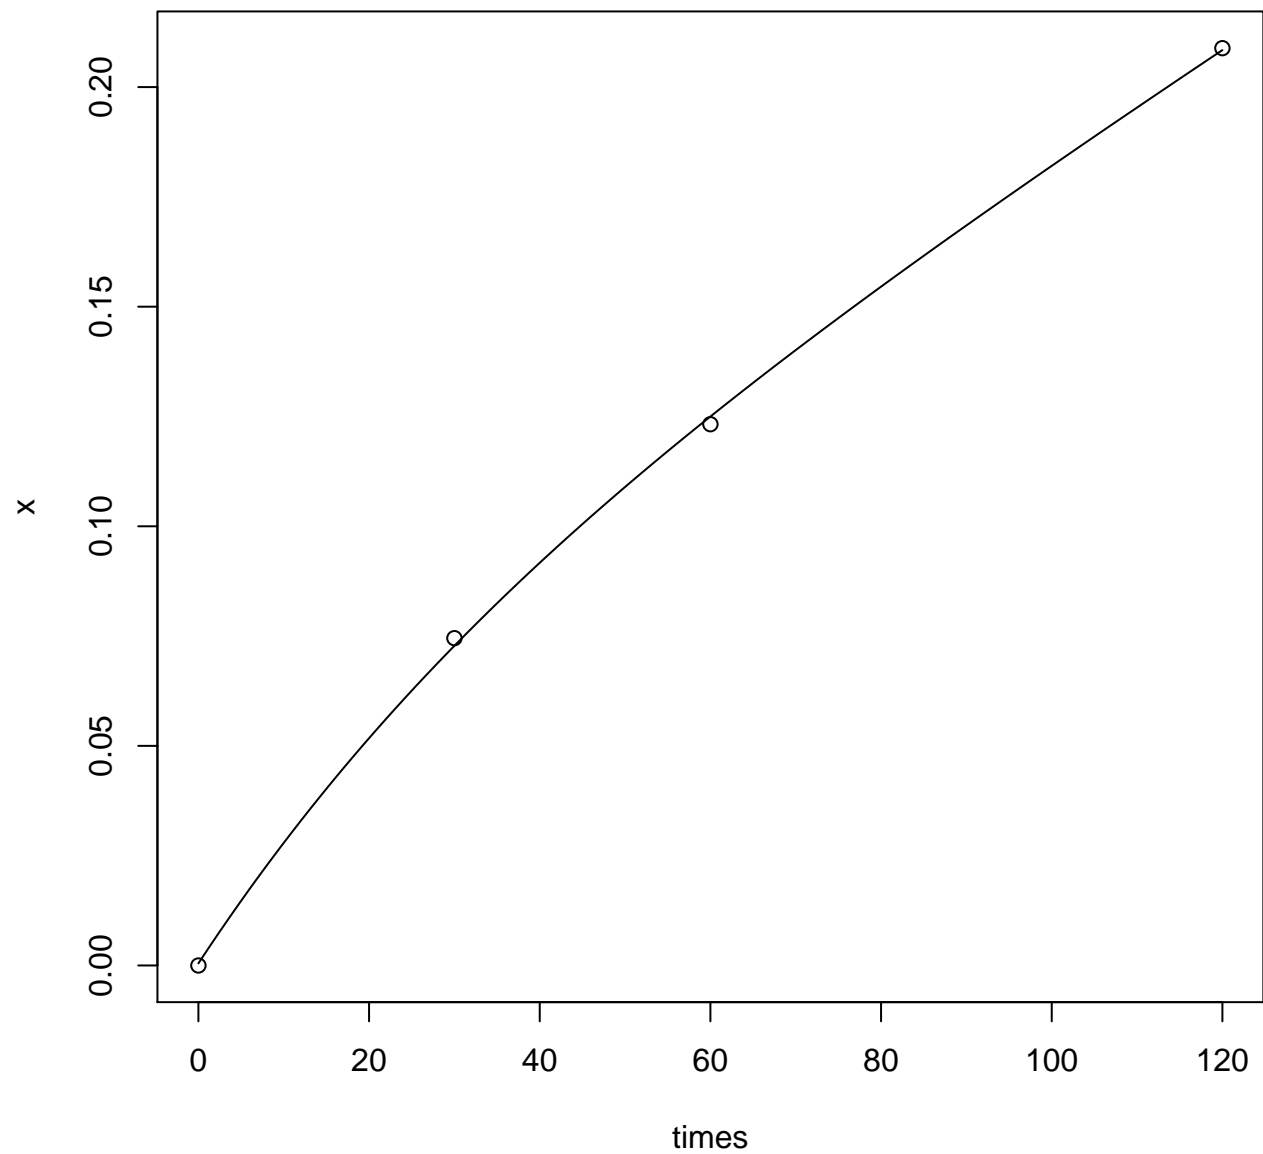

Supplement: s1 [file s1]

## fitting results

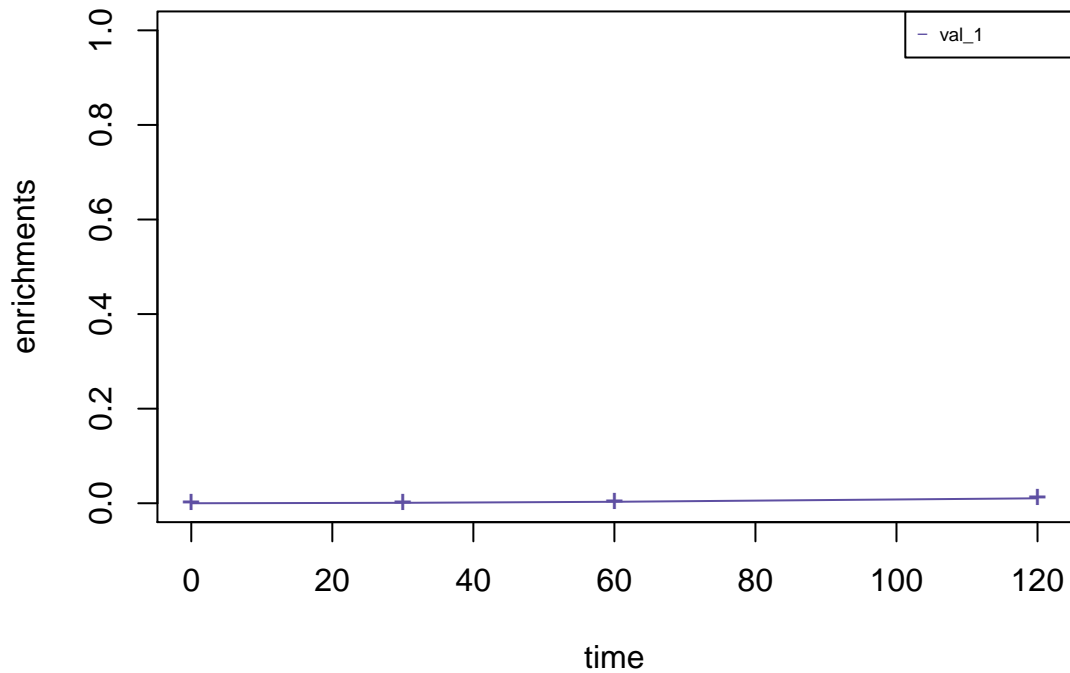

Supplement: s1 [file s1]

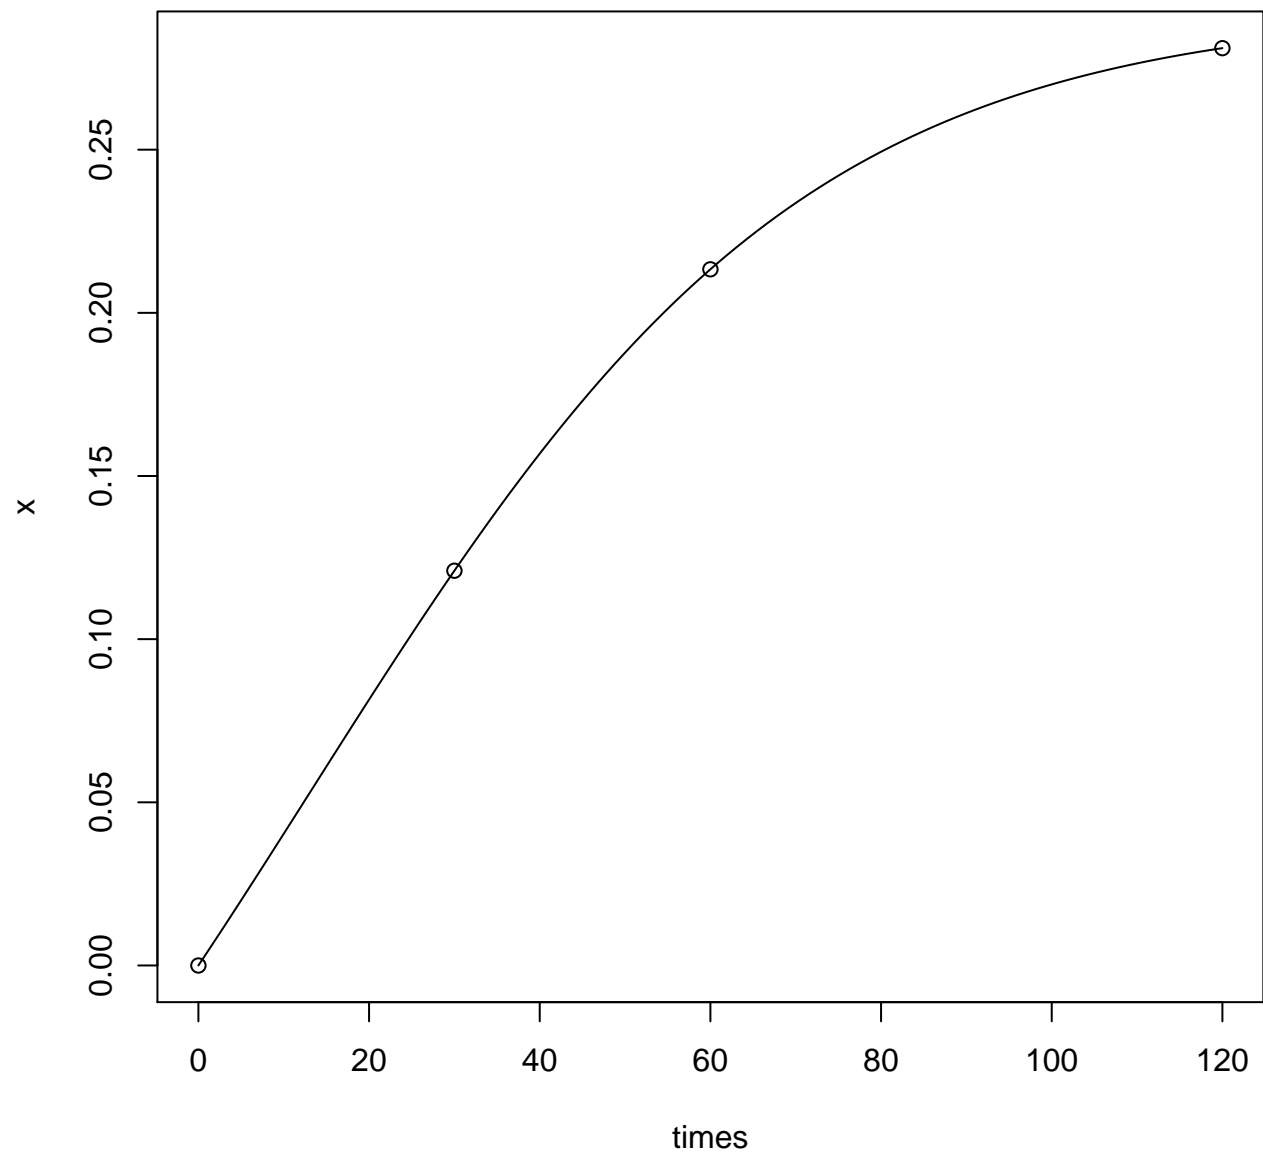

Supplement: s1 [file s1]

## fitting results

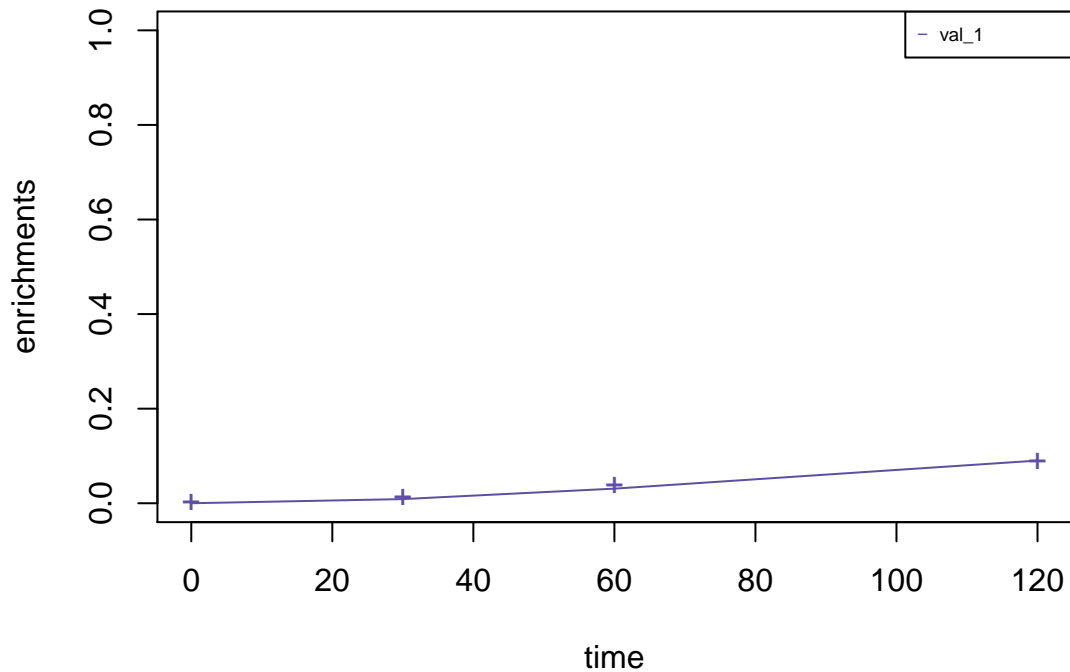

Supplement: s1 [file s1]

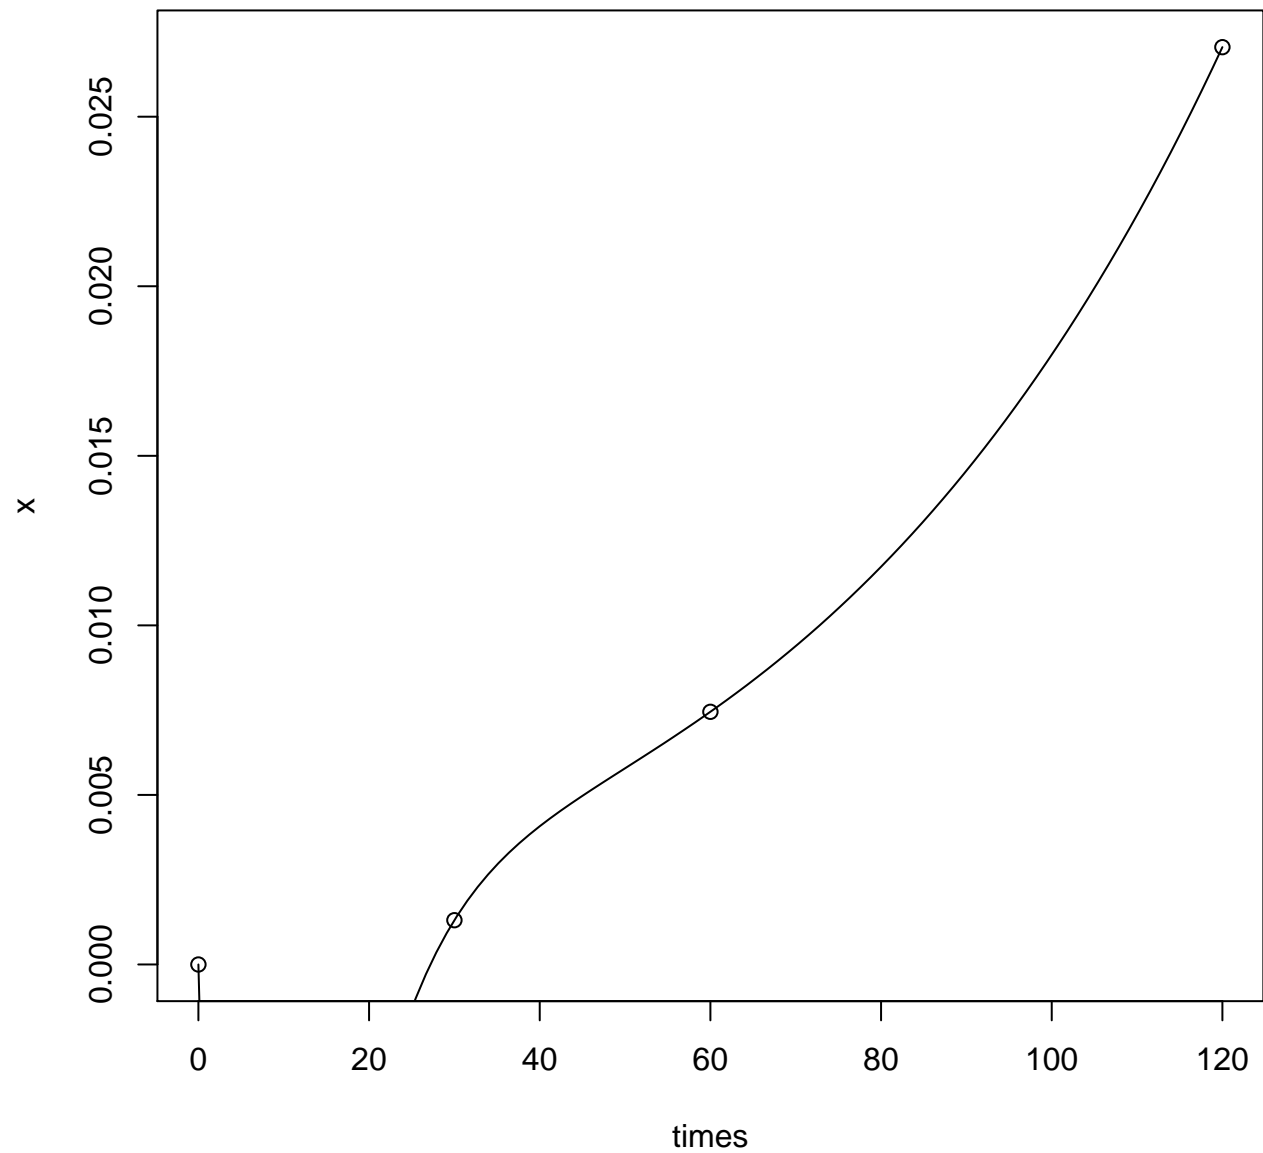

Supplement: s1 [file s1]

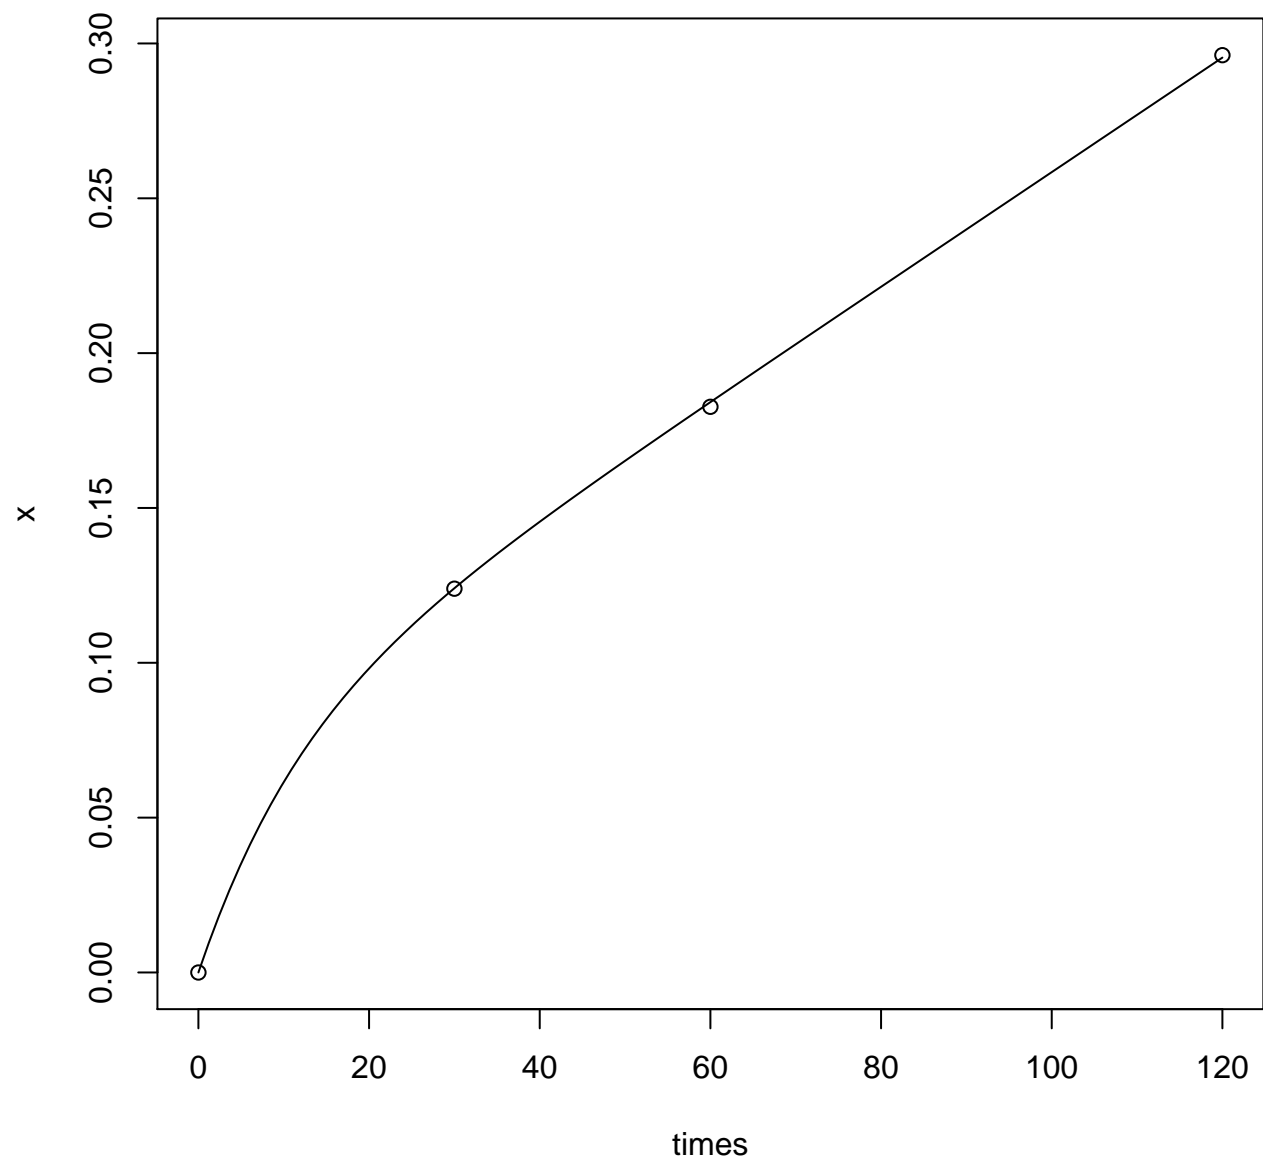

Supplement: s1 [file s1]

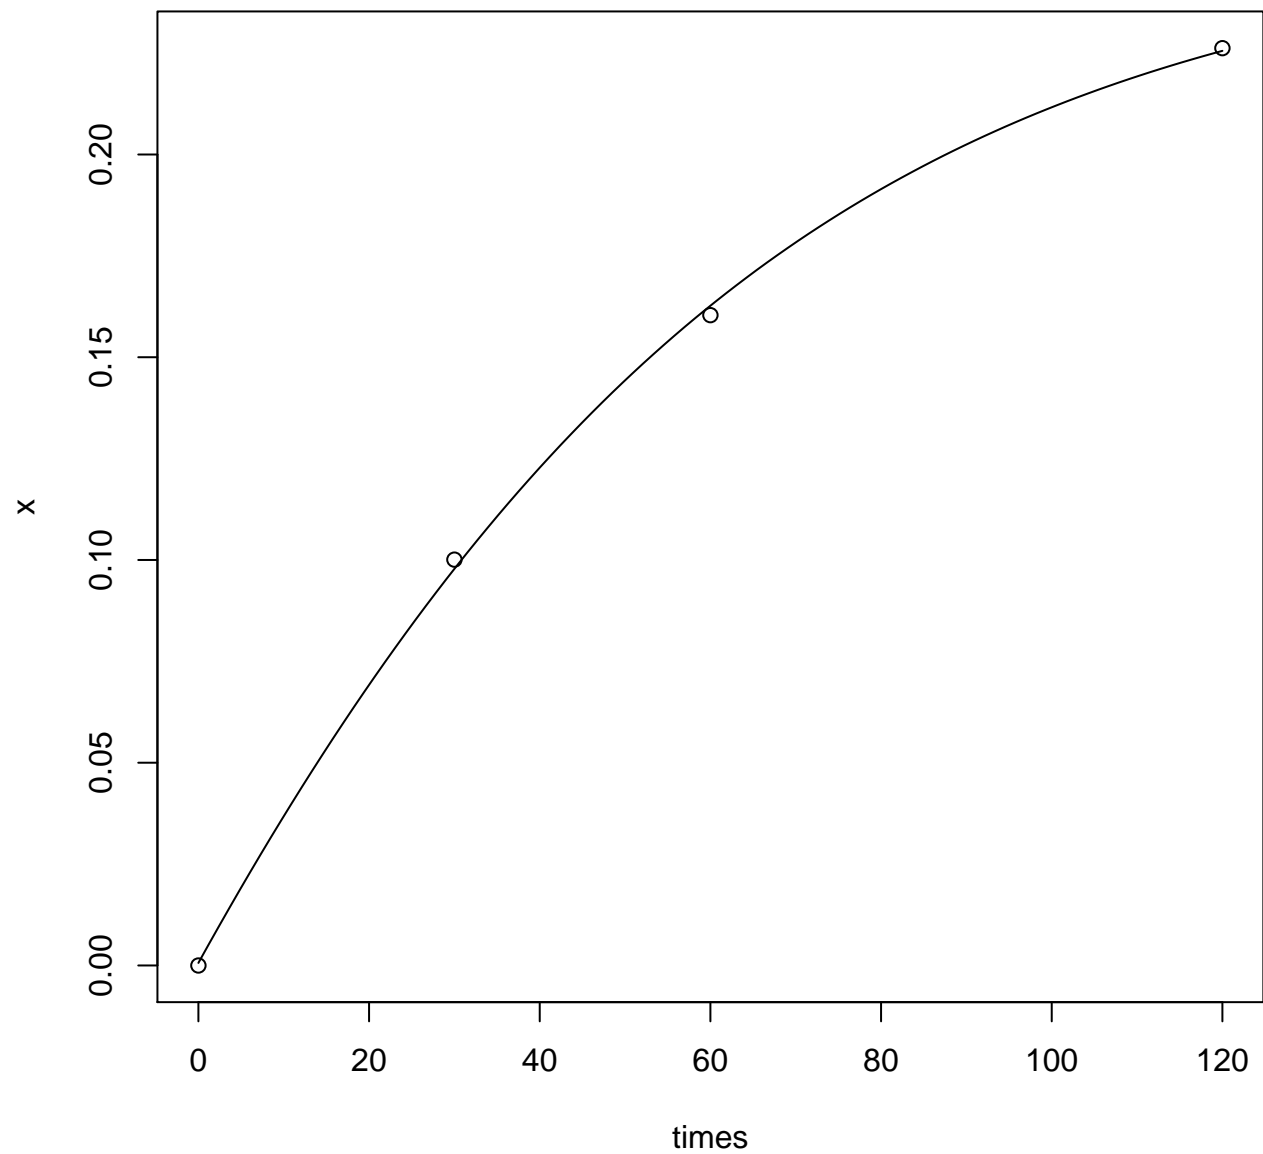

Supplement: s1 [file s1]

## fitting results

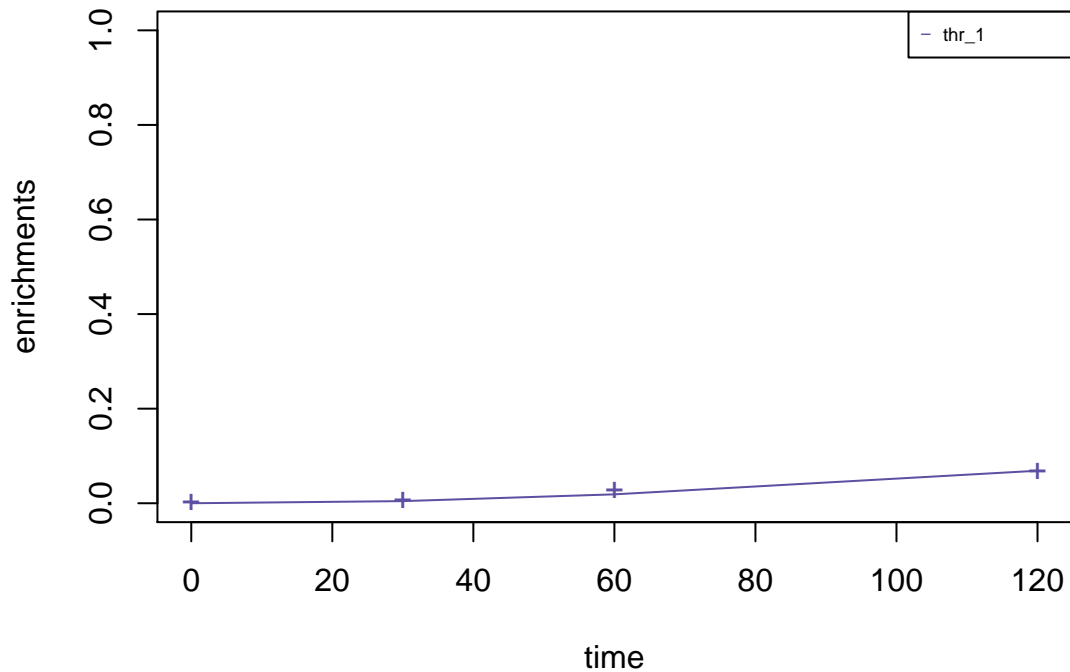

Supplement: s1 [file s1]

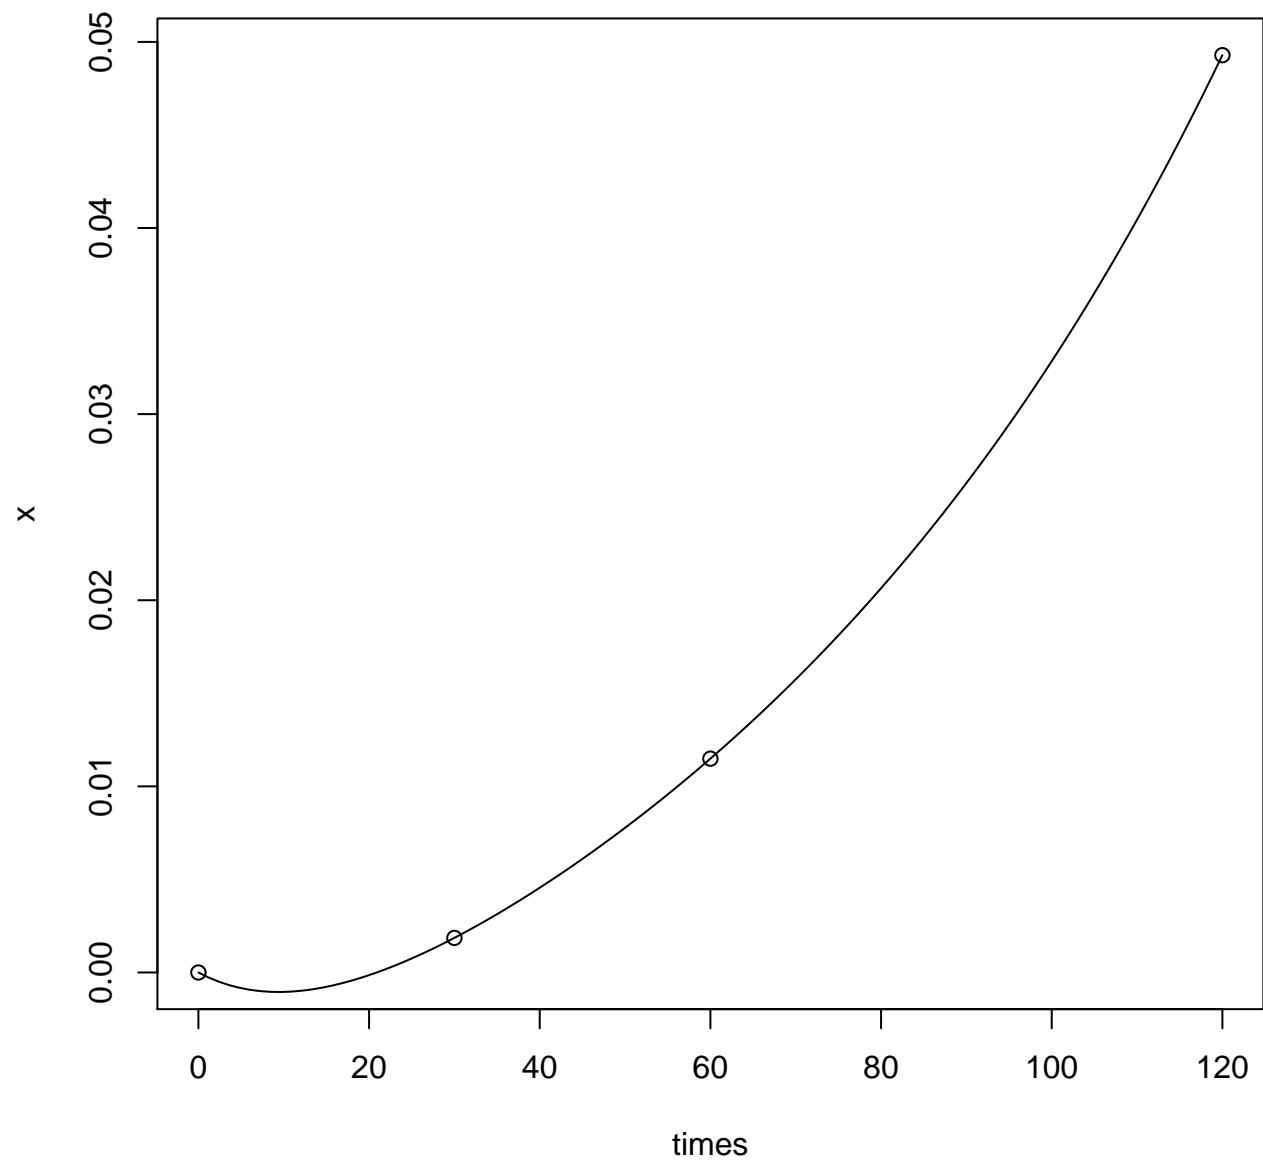

Supplement: s1 [file s1]

## fitting results

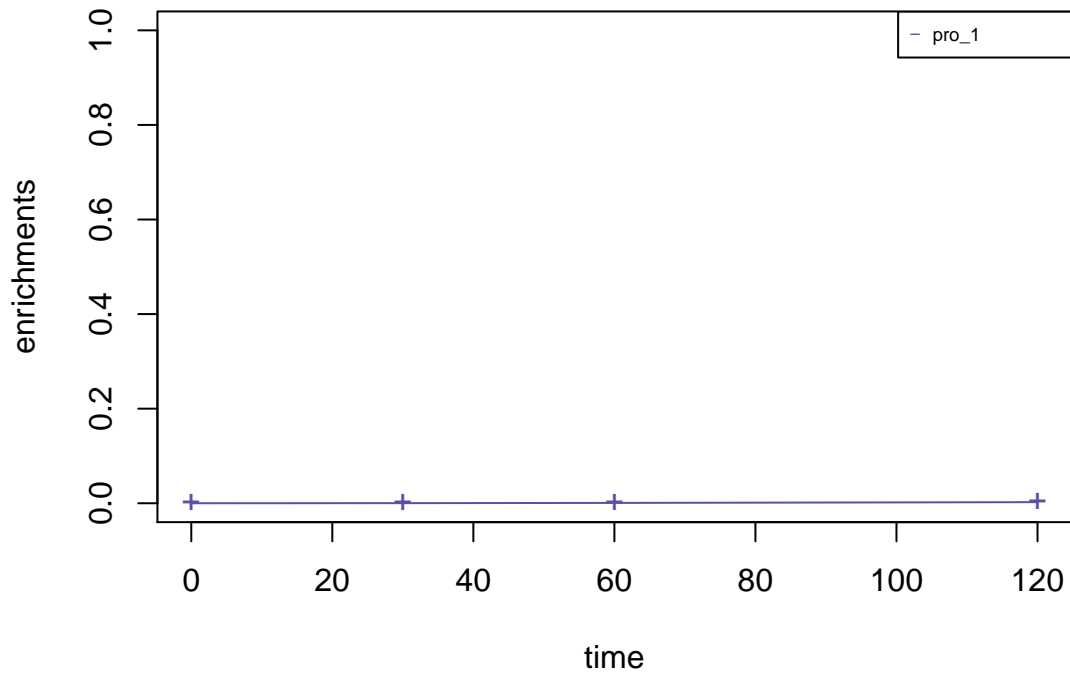

Supplement: s1 [file s1]

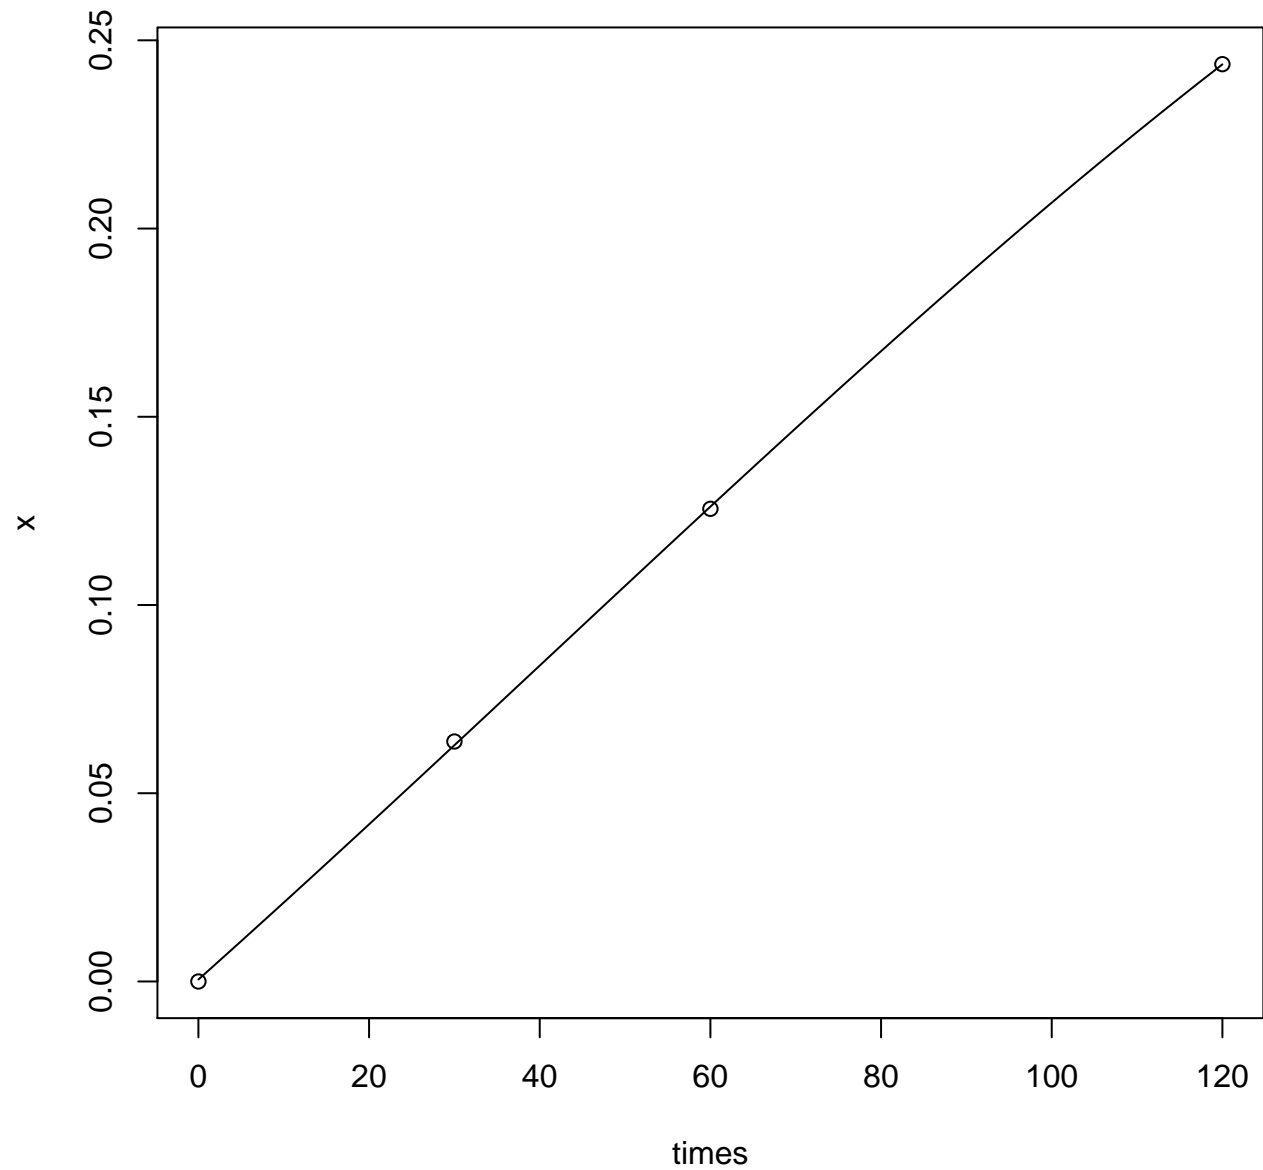

Supplement: s1 [file s1]

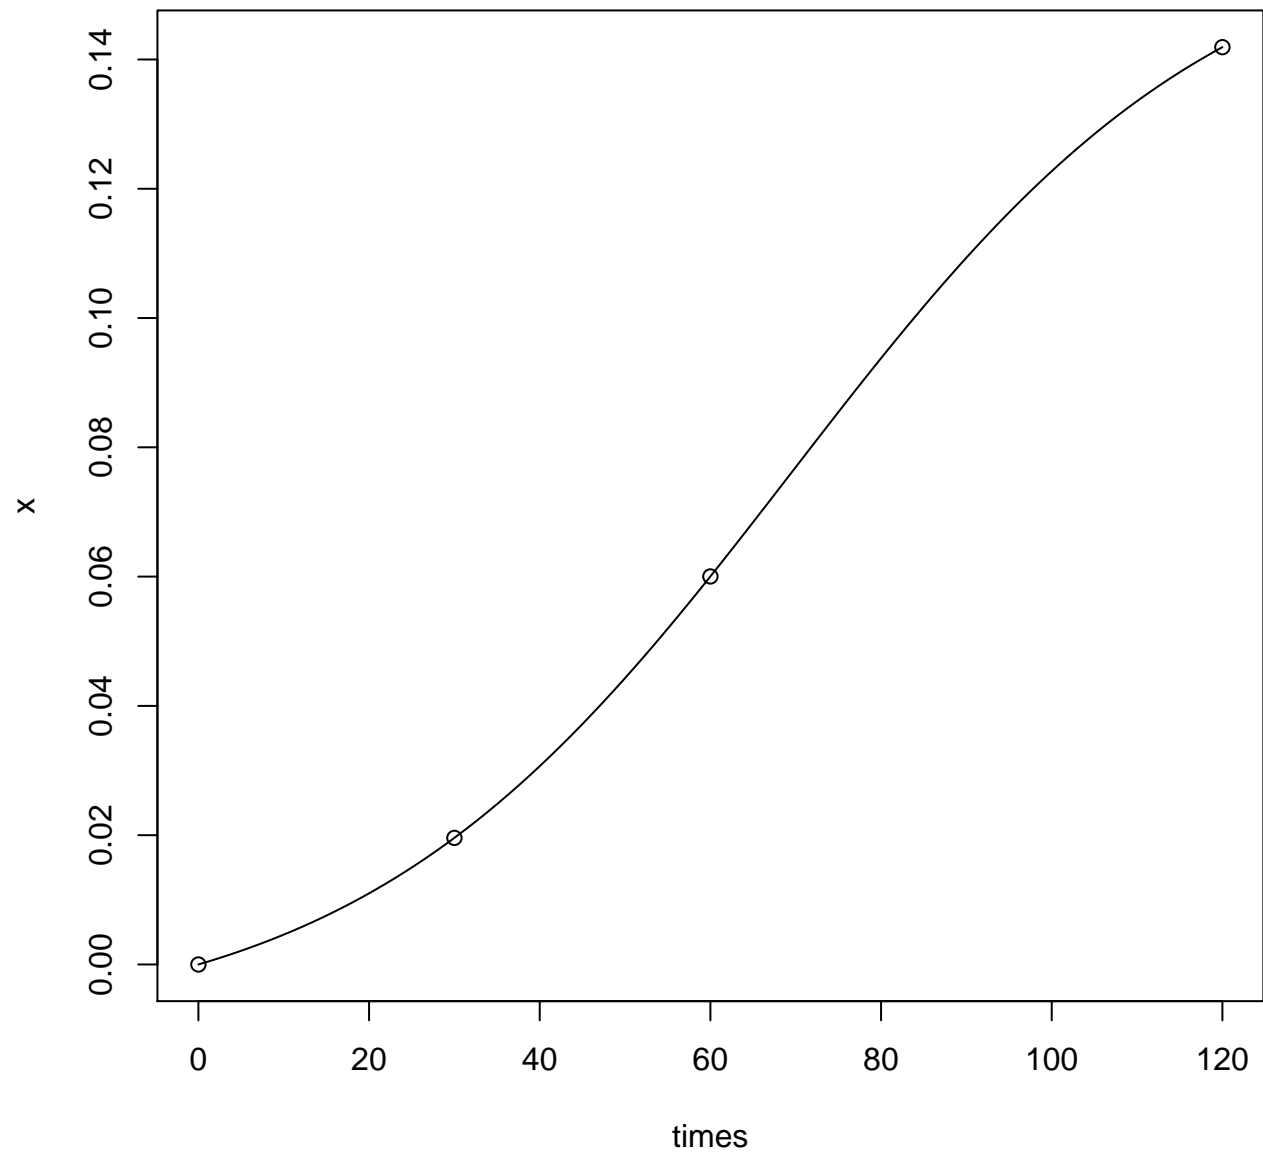

Supplement: s1 [file s1]

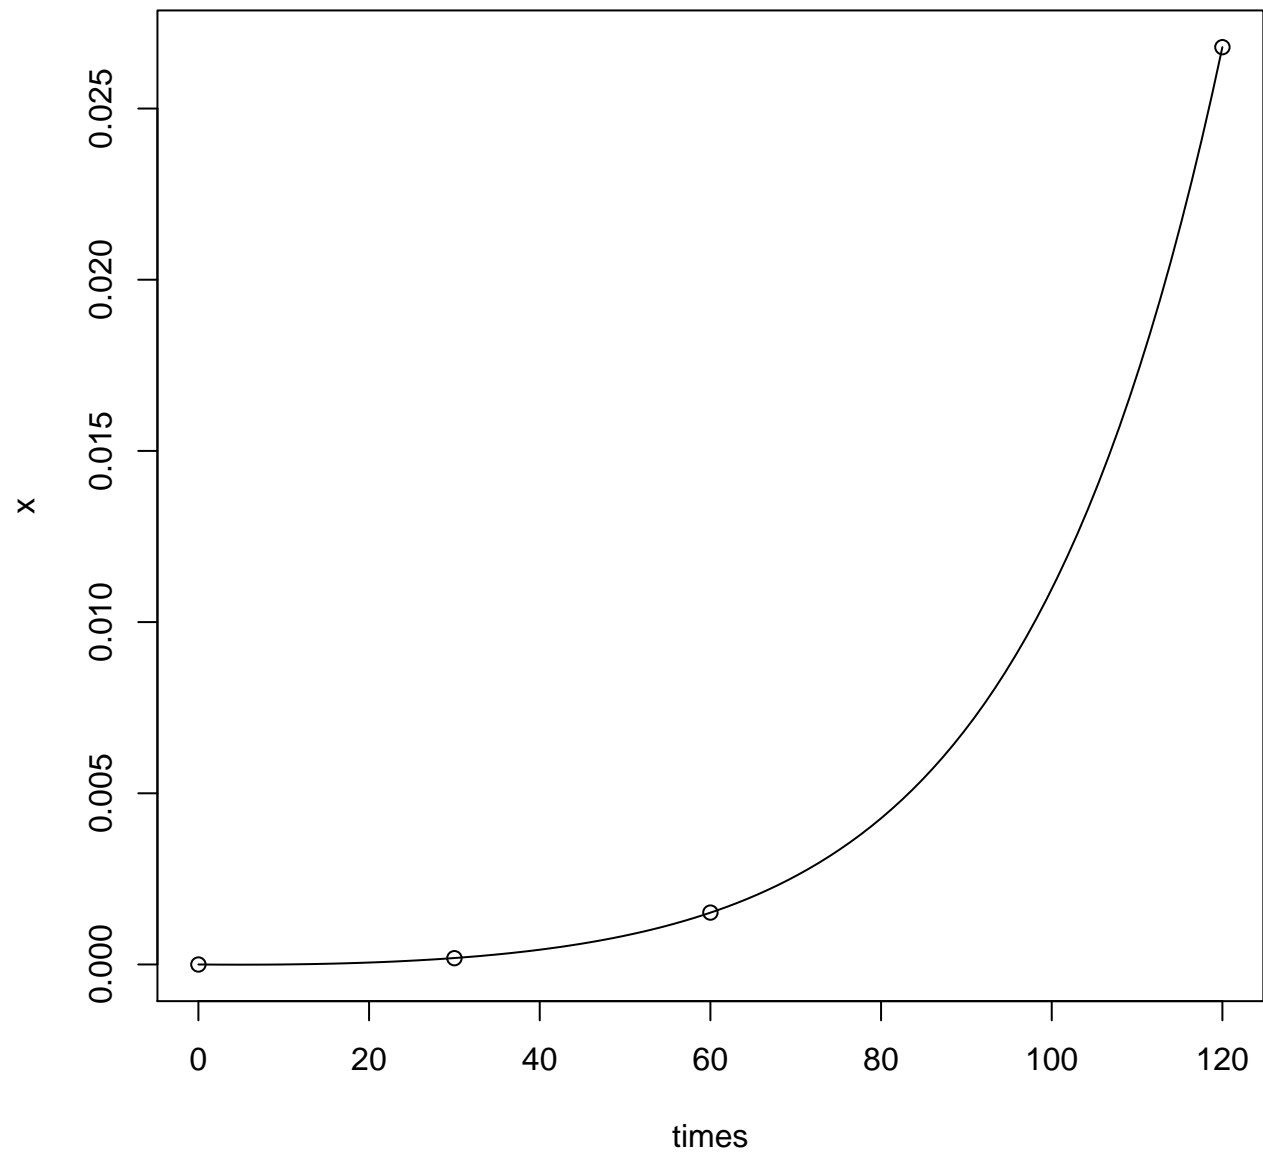

Supplement: s1 [file s1]

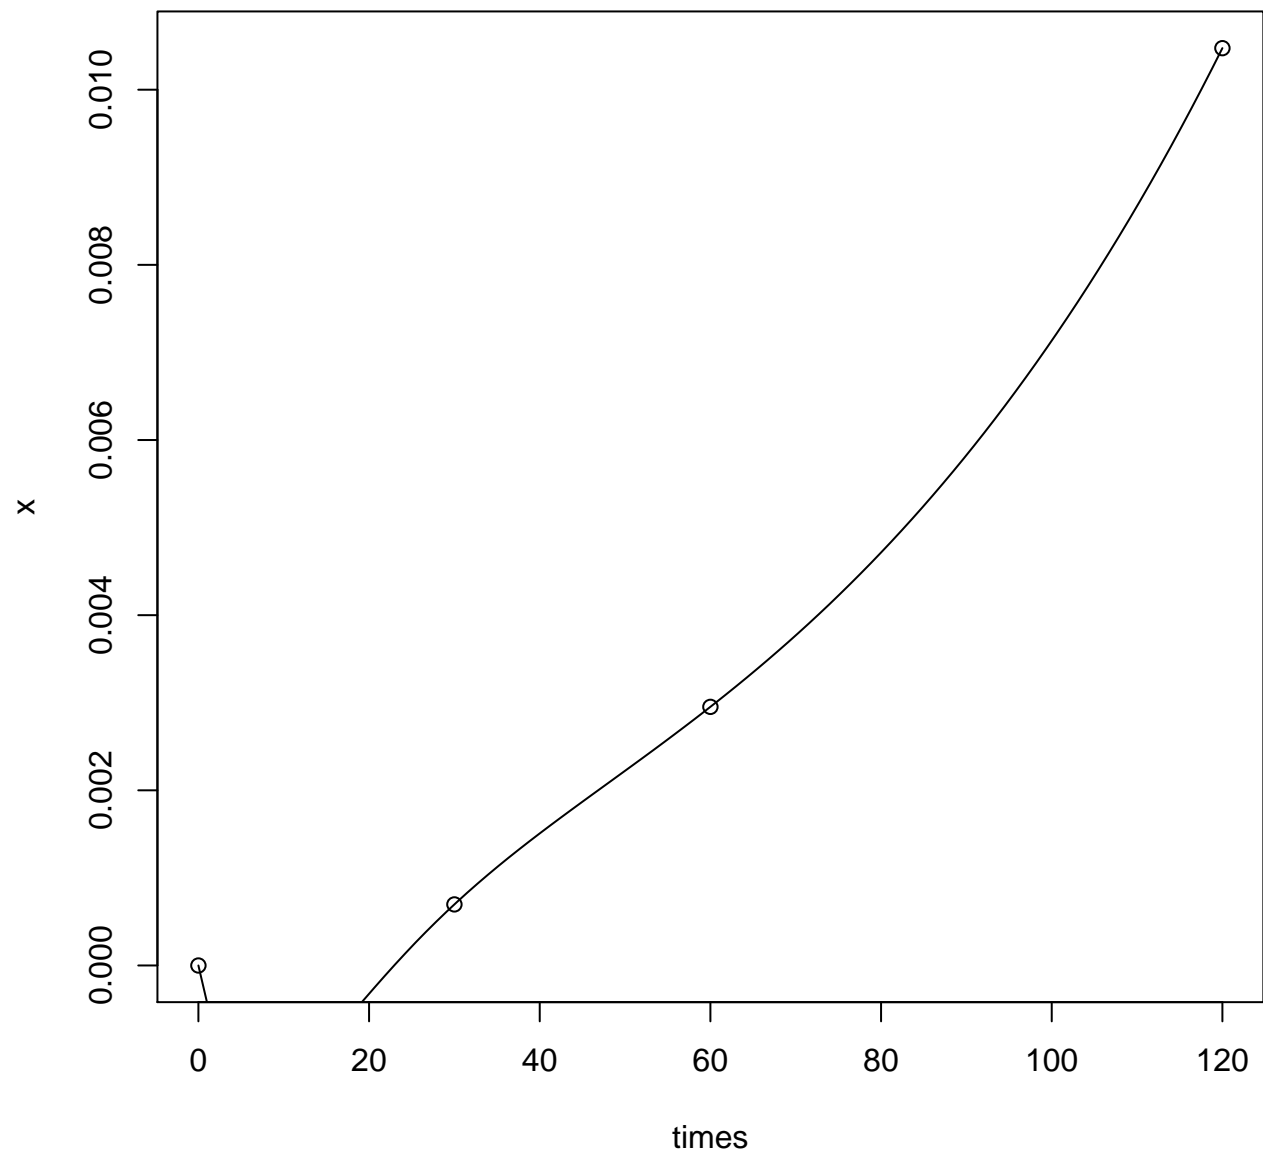

Supplement: s1 [file s1]

## fitting results

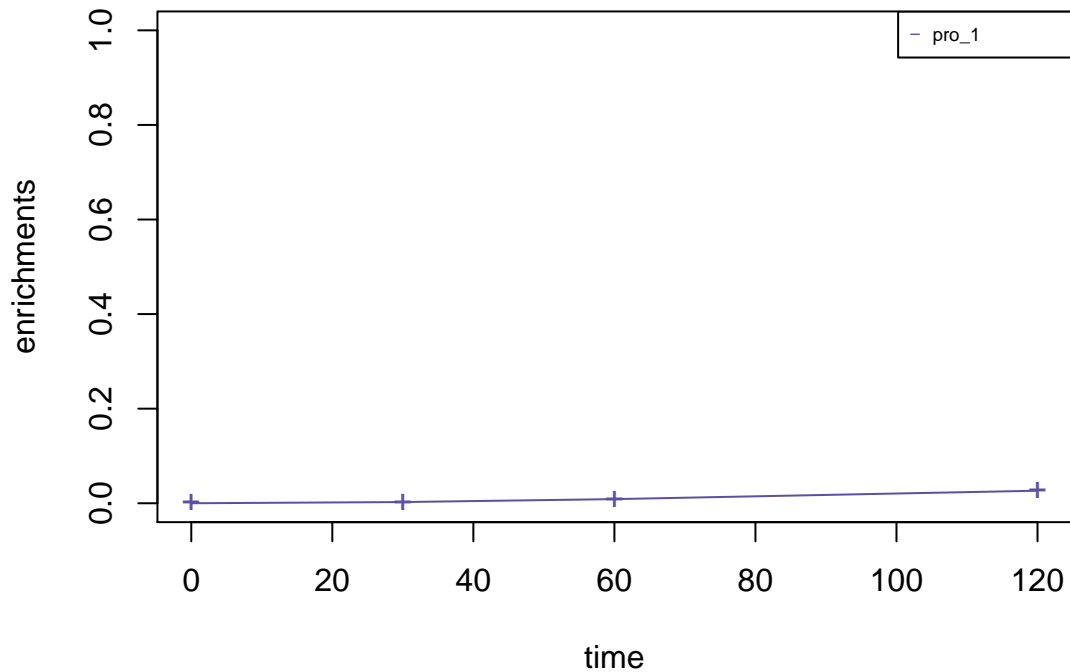

Supplement: s1 [file s1]

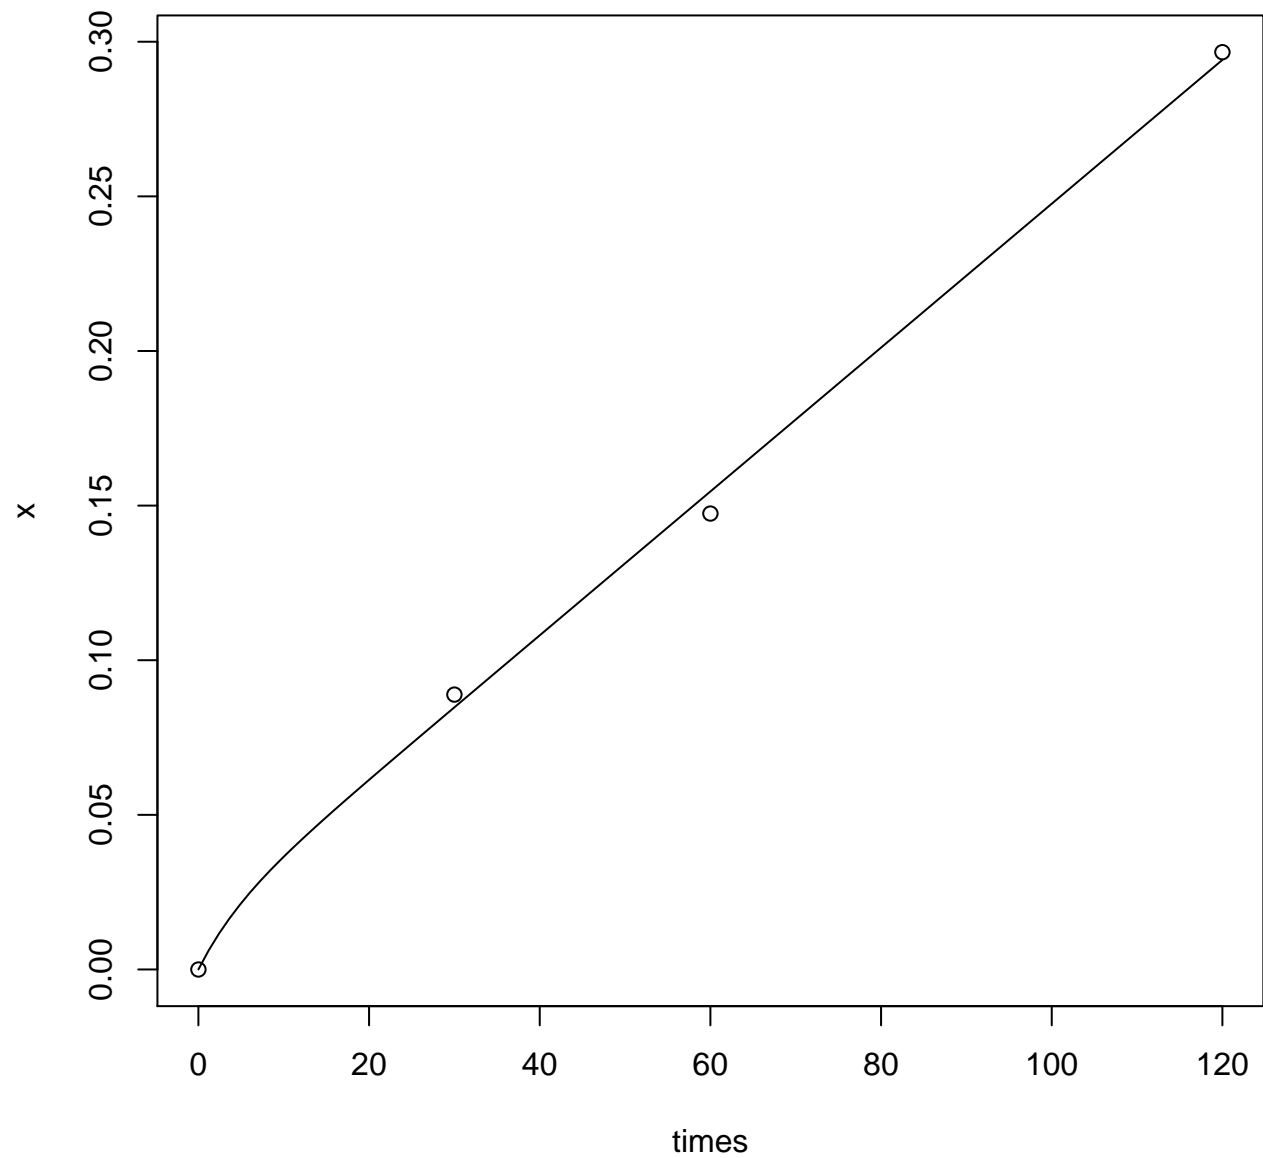

Supplement: s1 [file s1]

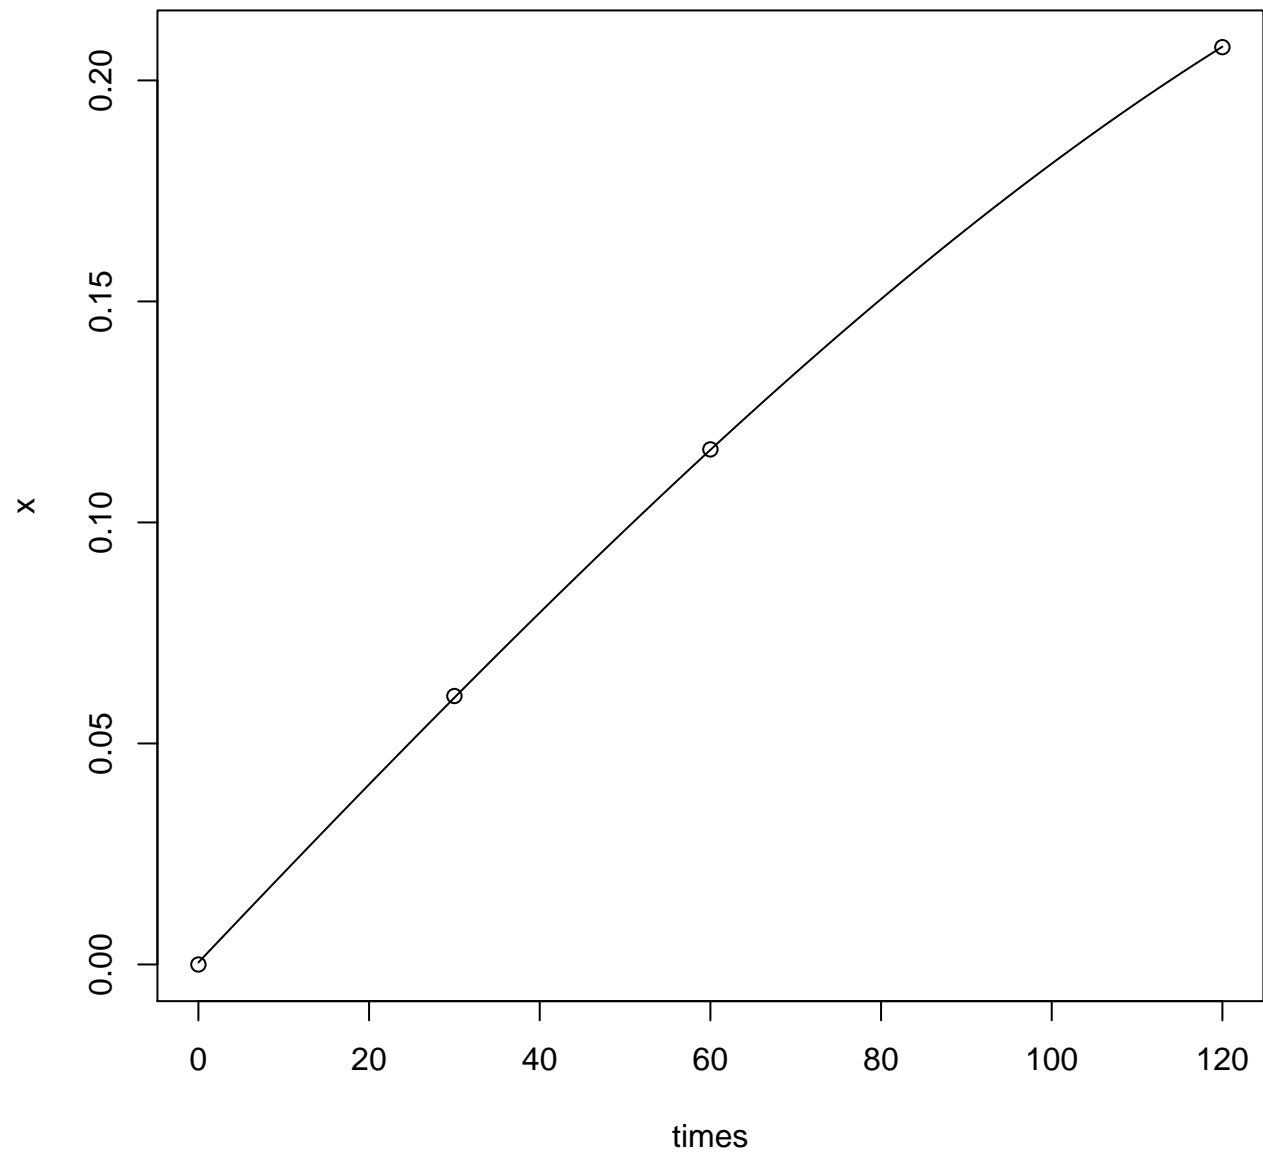

Supplement: s1 [file s1]

## fitting results

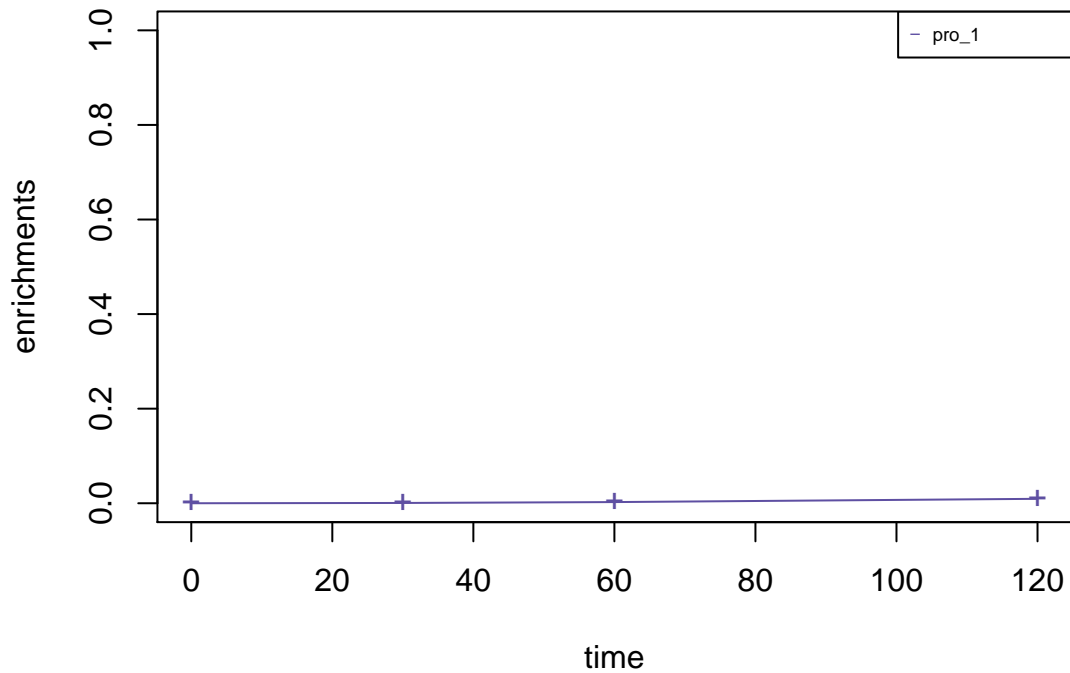

Supplement: s1 [file s1]

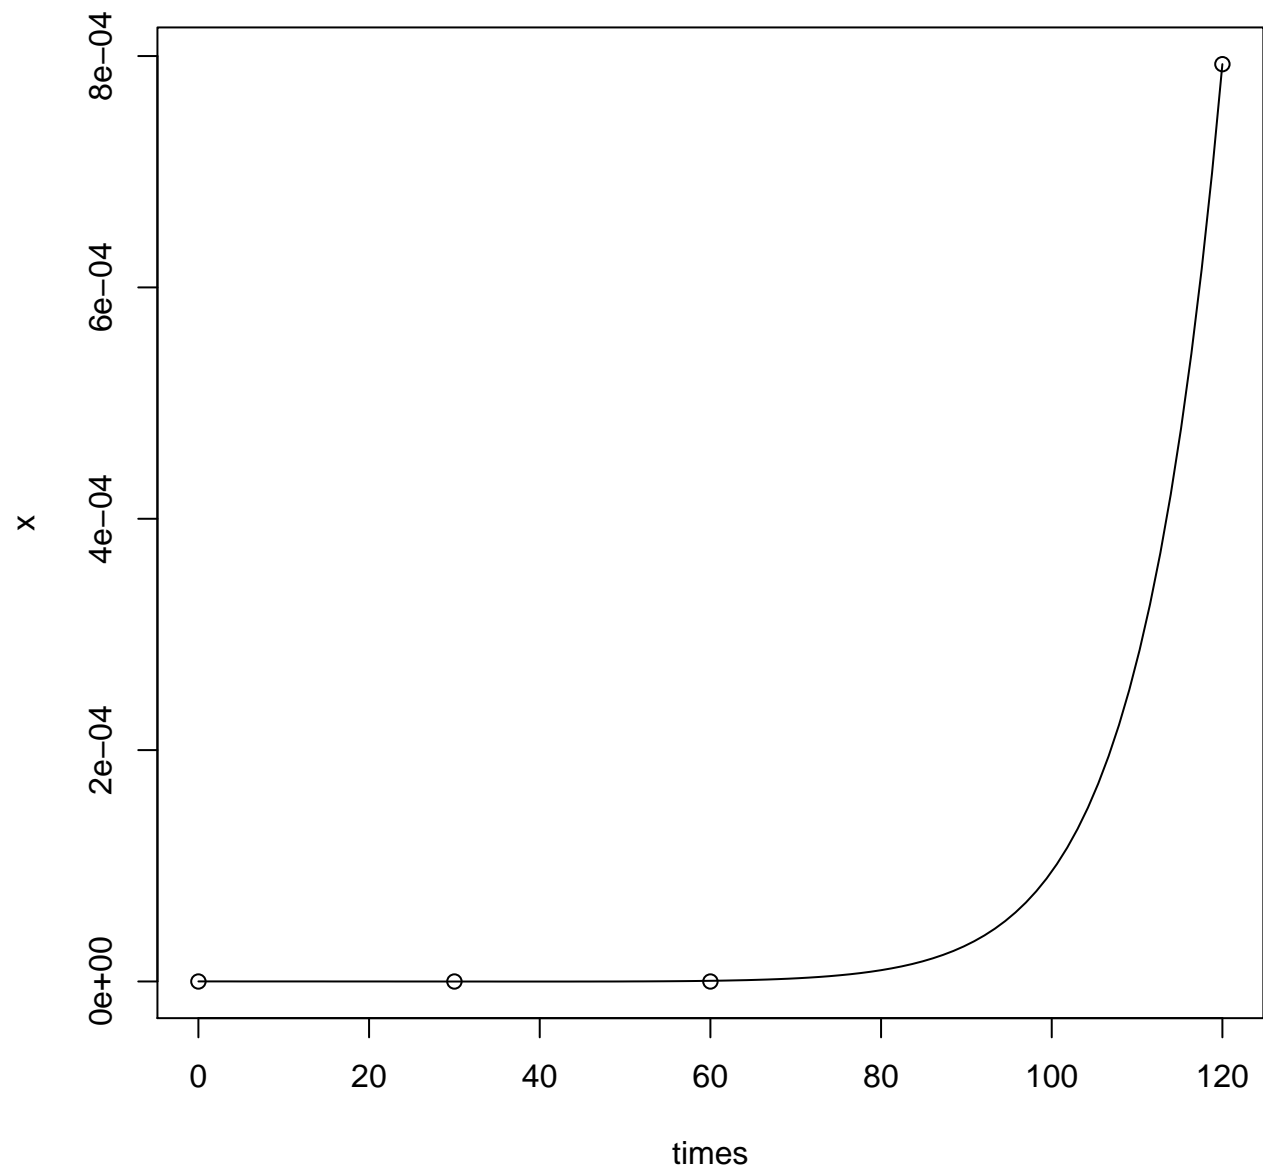

Supplement: s1 [file s1]

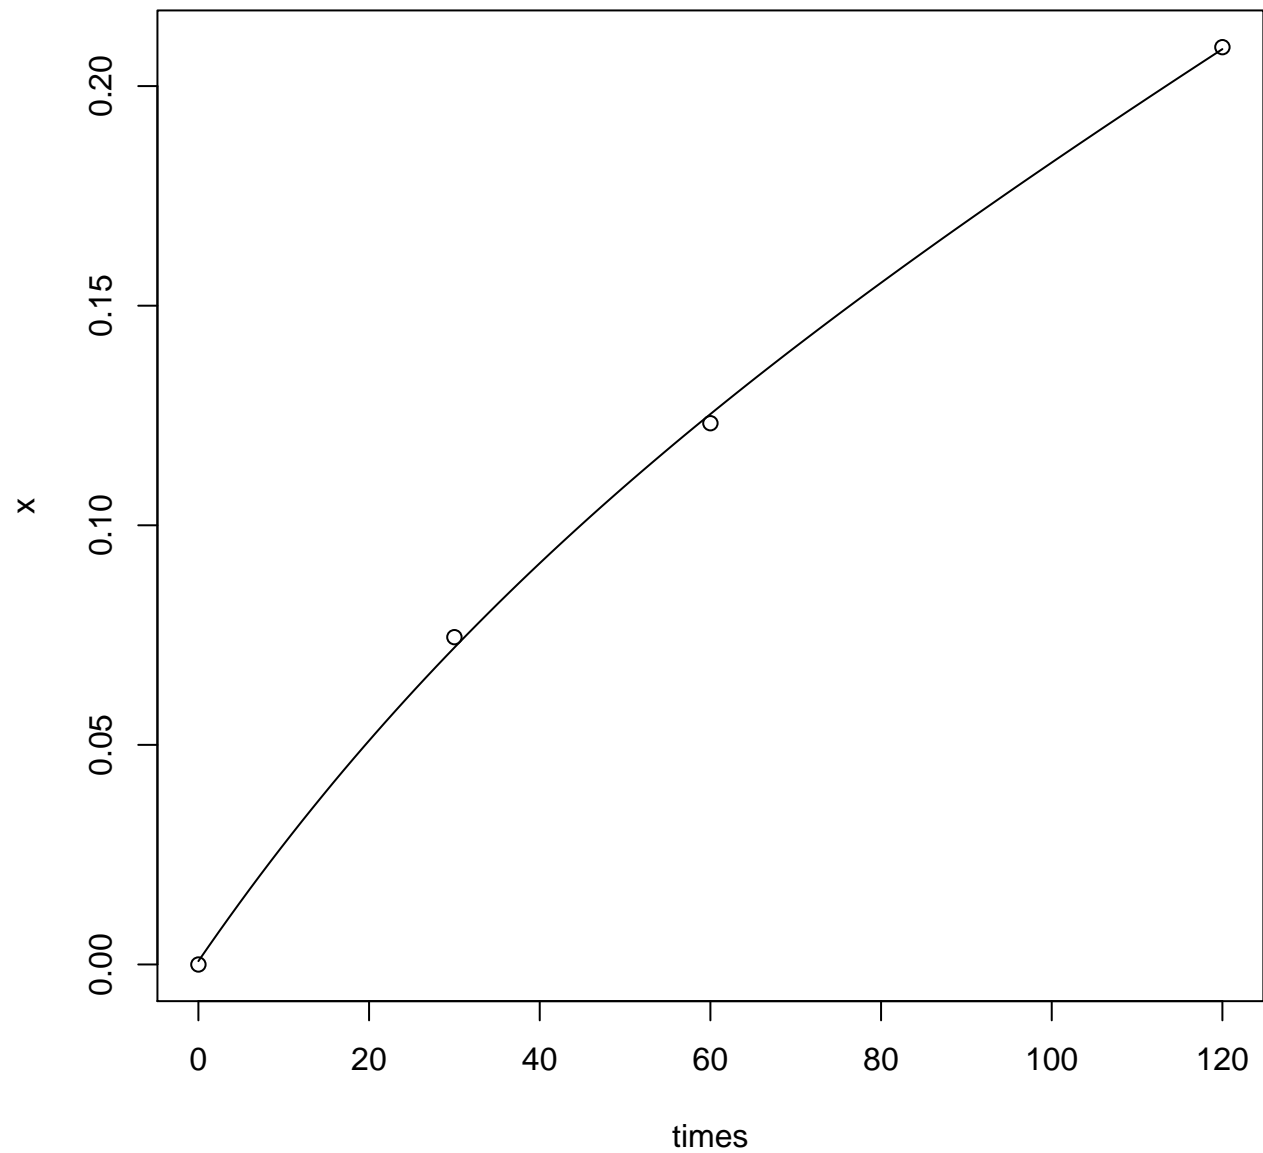

Supplement: s1 [file s1]

## fitting results

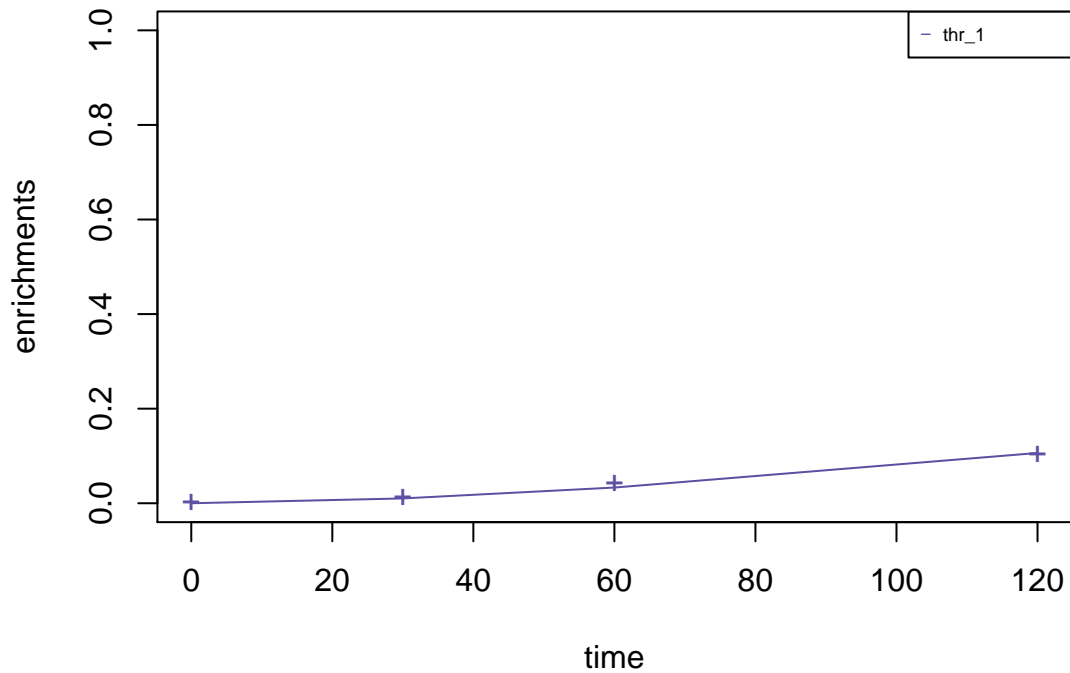

Supplement: s1 [file s1]

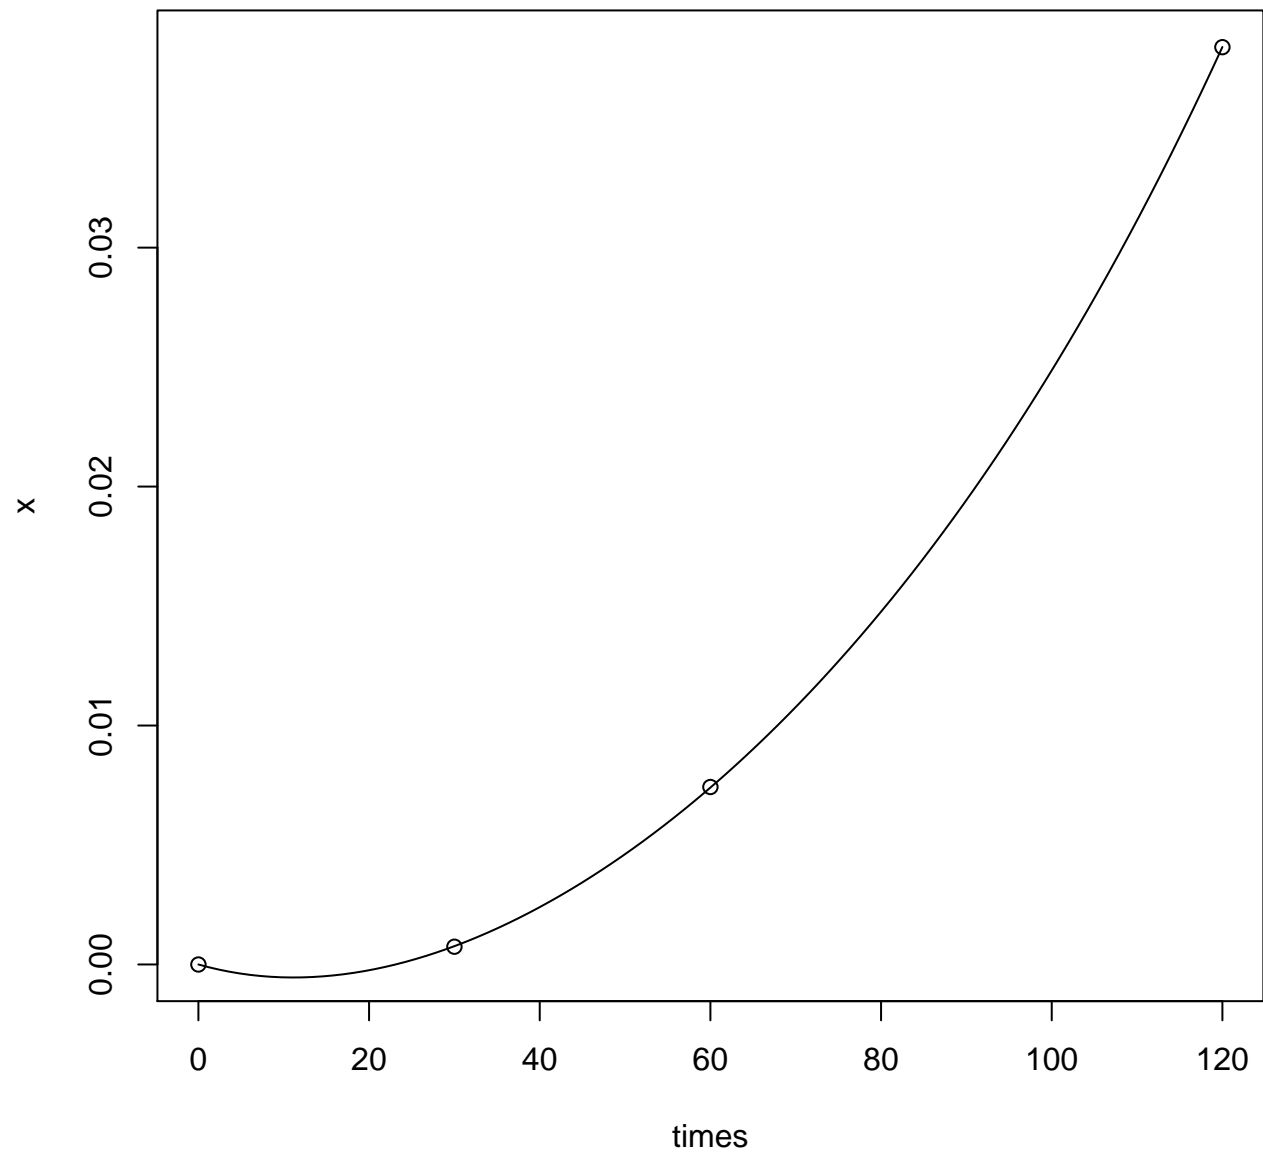

Supplement: s1 [file s1]

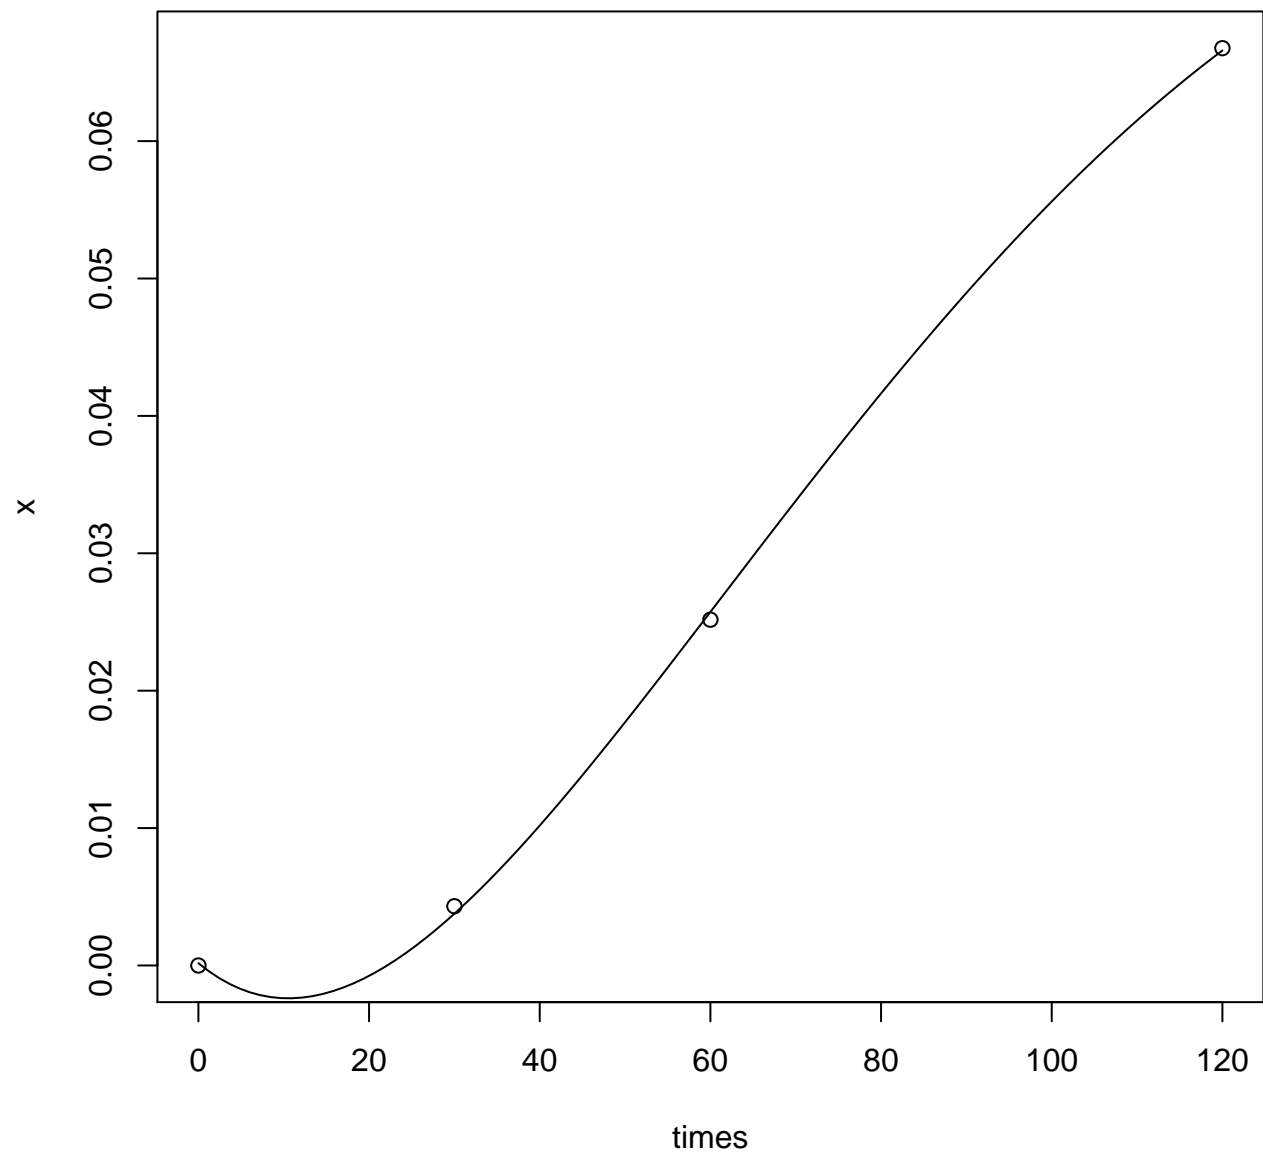

Supplement: s1 [file s1]

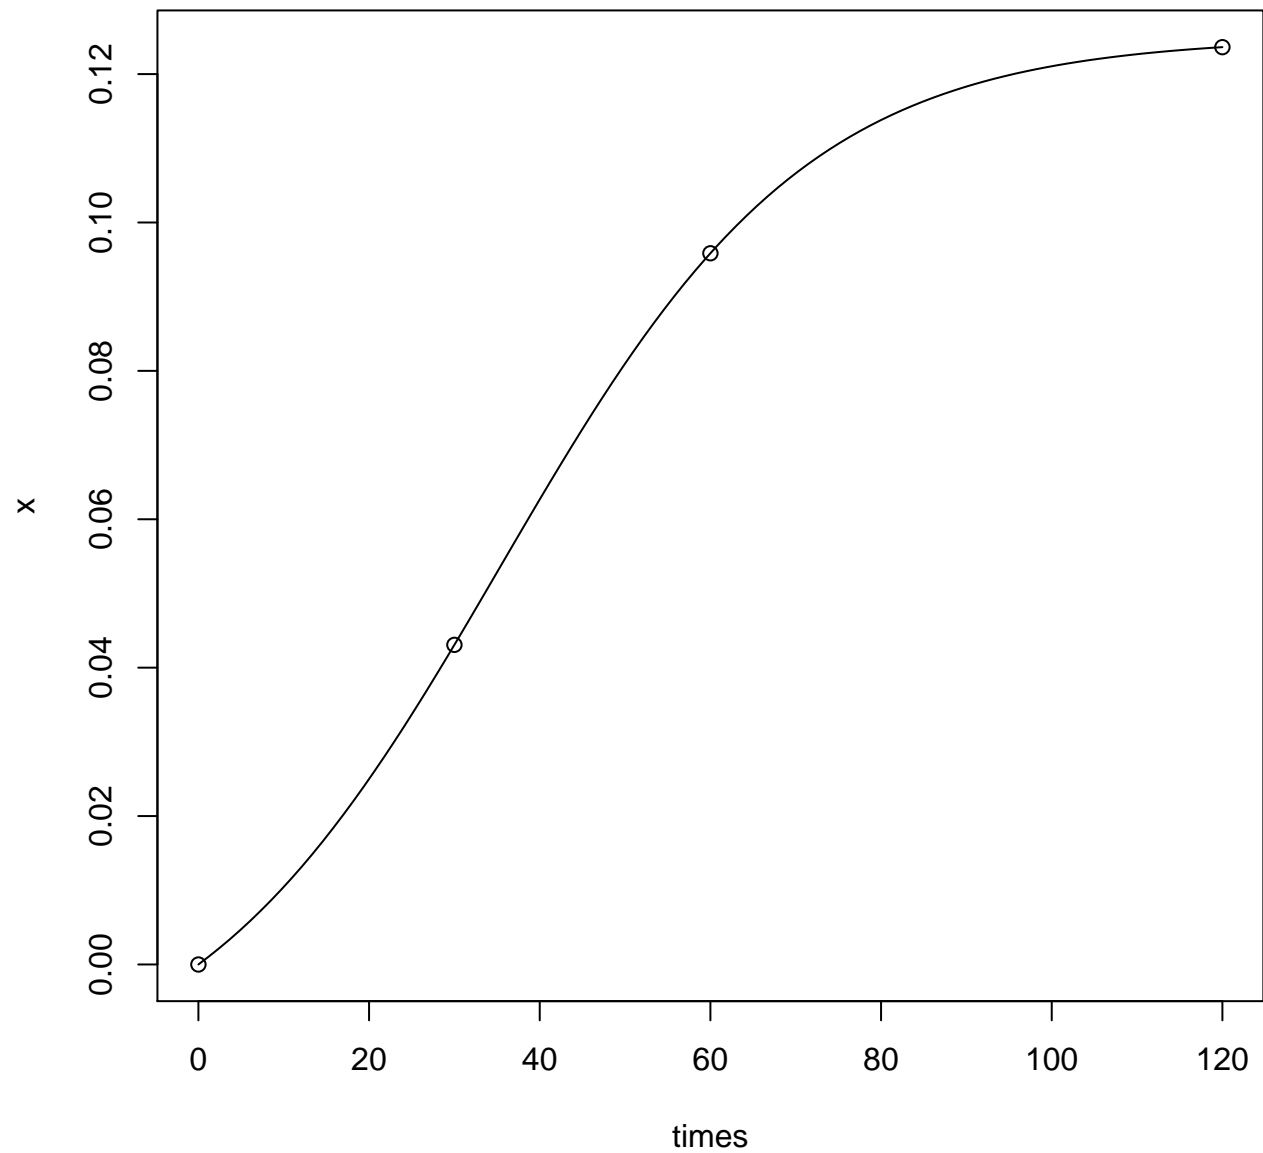

Supplement: s1 [file s1]

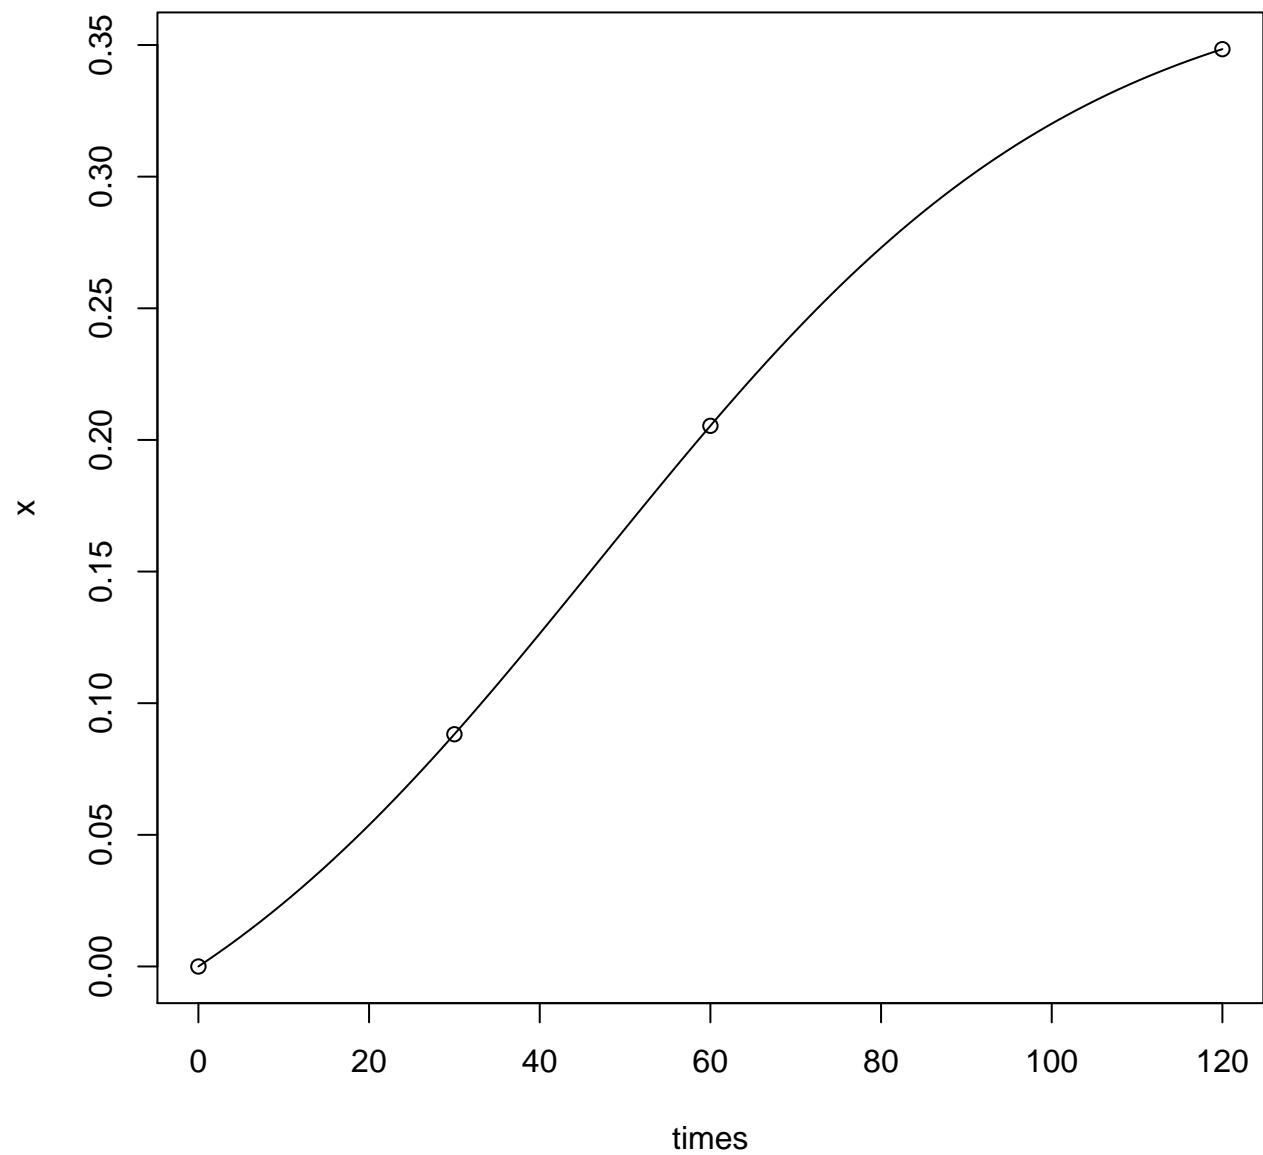

Supplement: s1 [file s1]

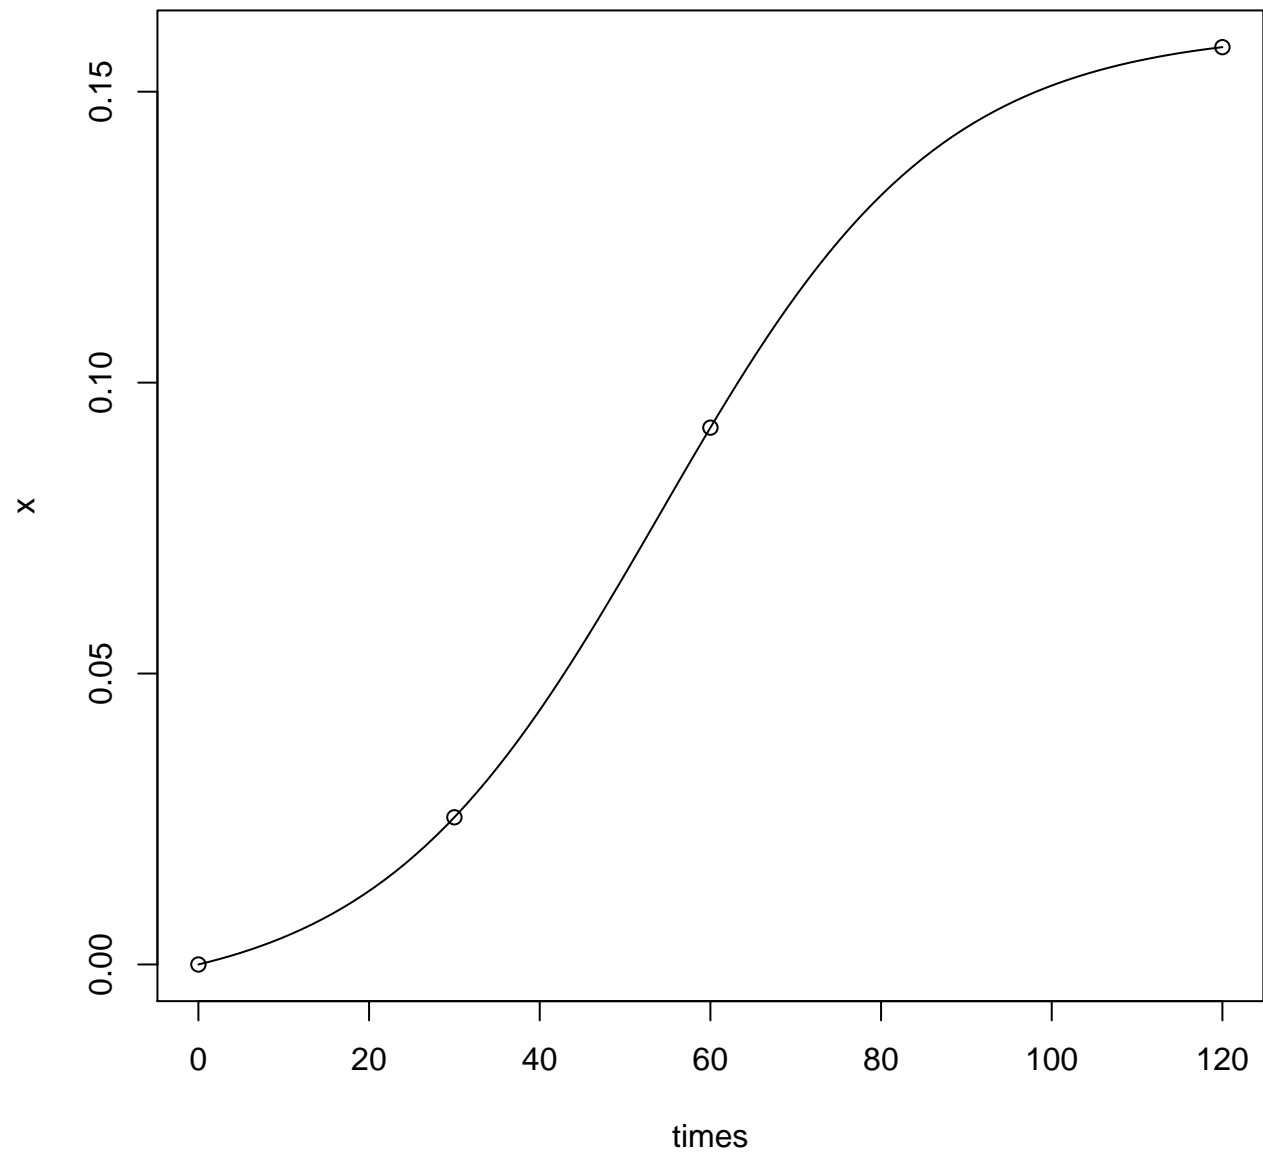

Supplement: s1 [file s1]

## fitting results

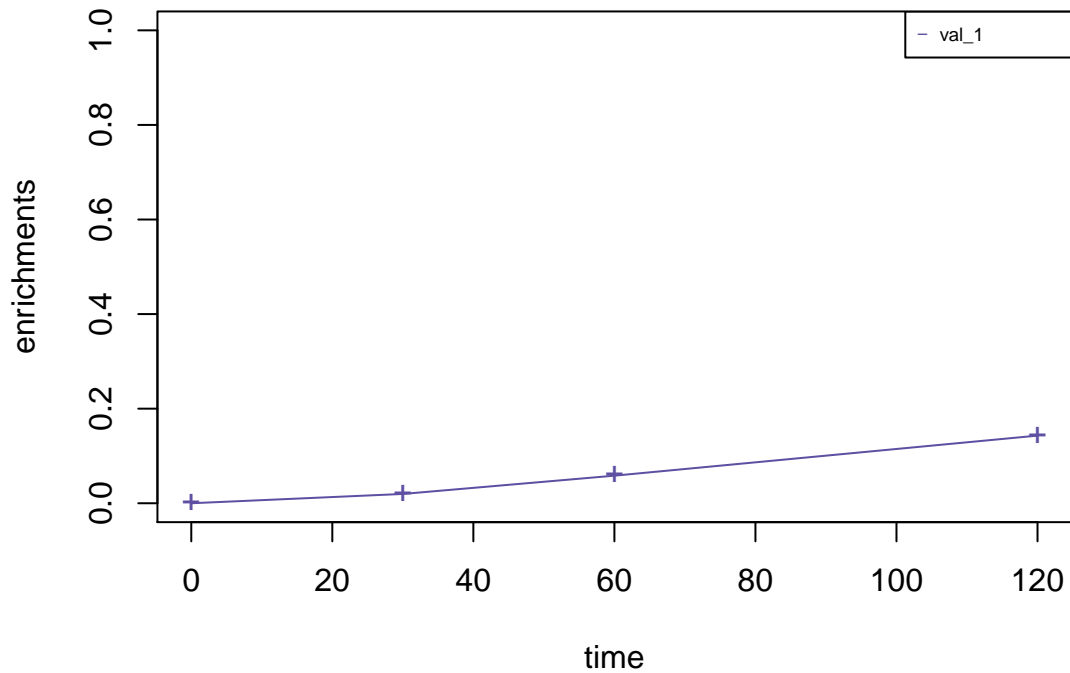

Supplement: s1 [file s1]

## fitting results

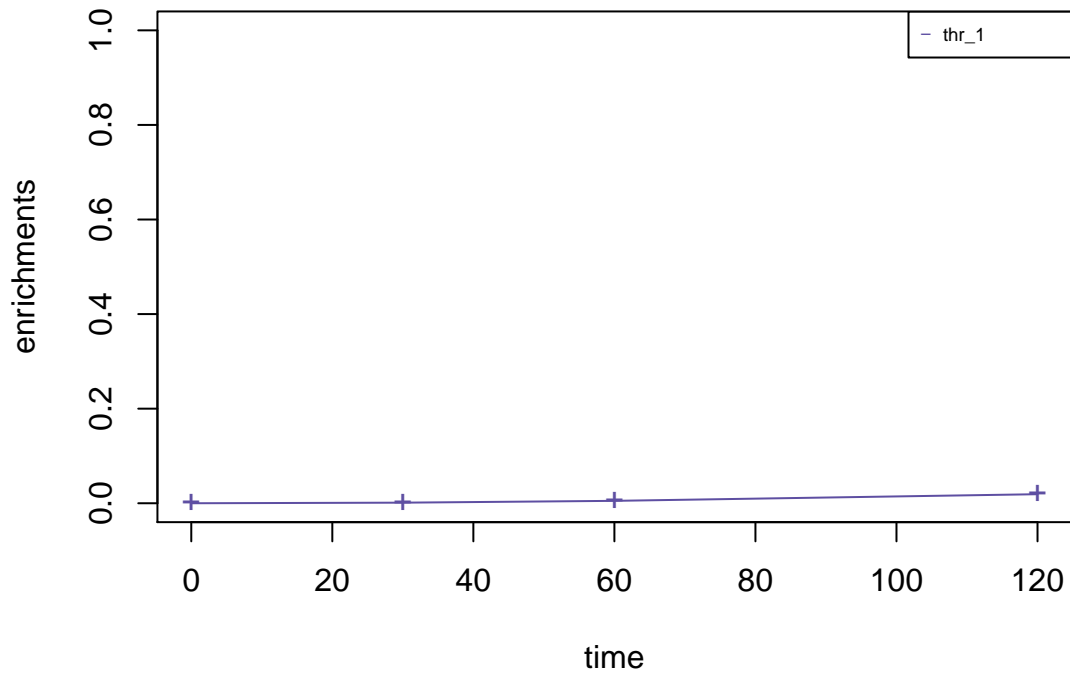

Supplement: s1 [file s1]

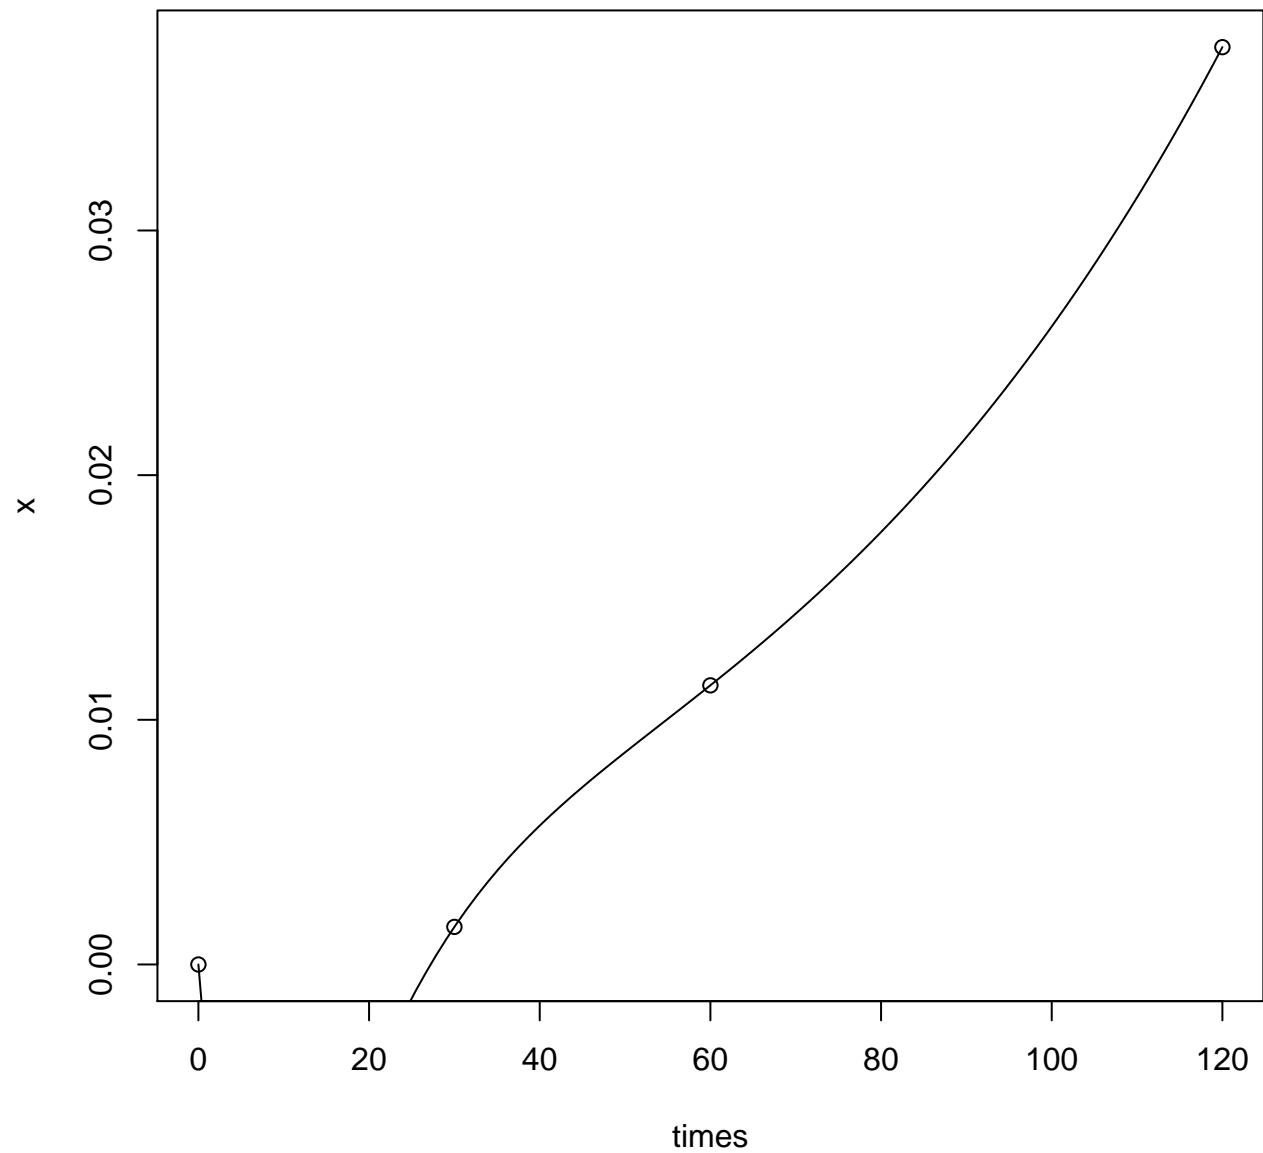

Supplement: s1 [file s1]

## fitting results

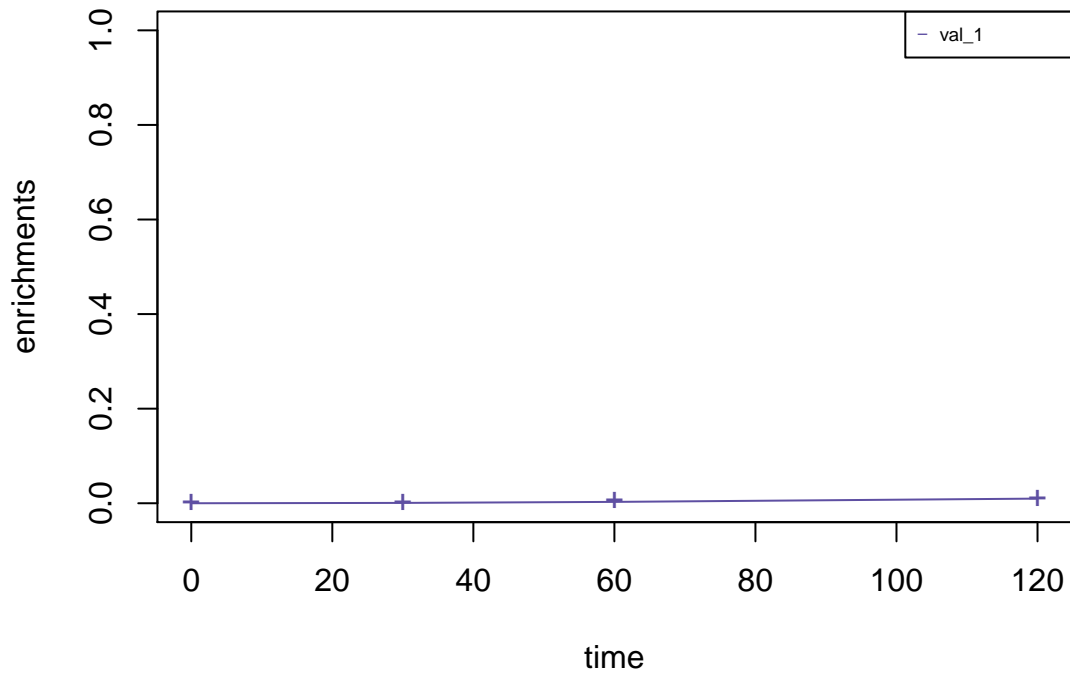

Supplement: s1 [file s1]

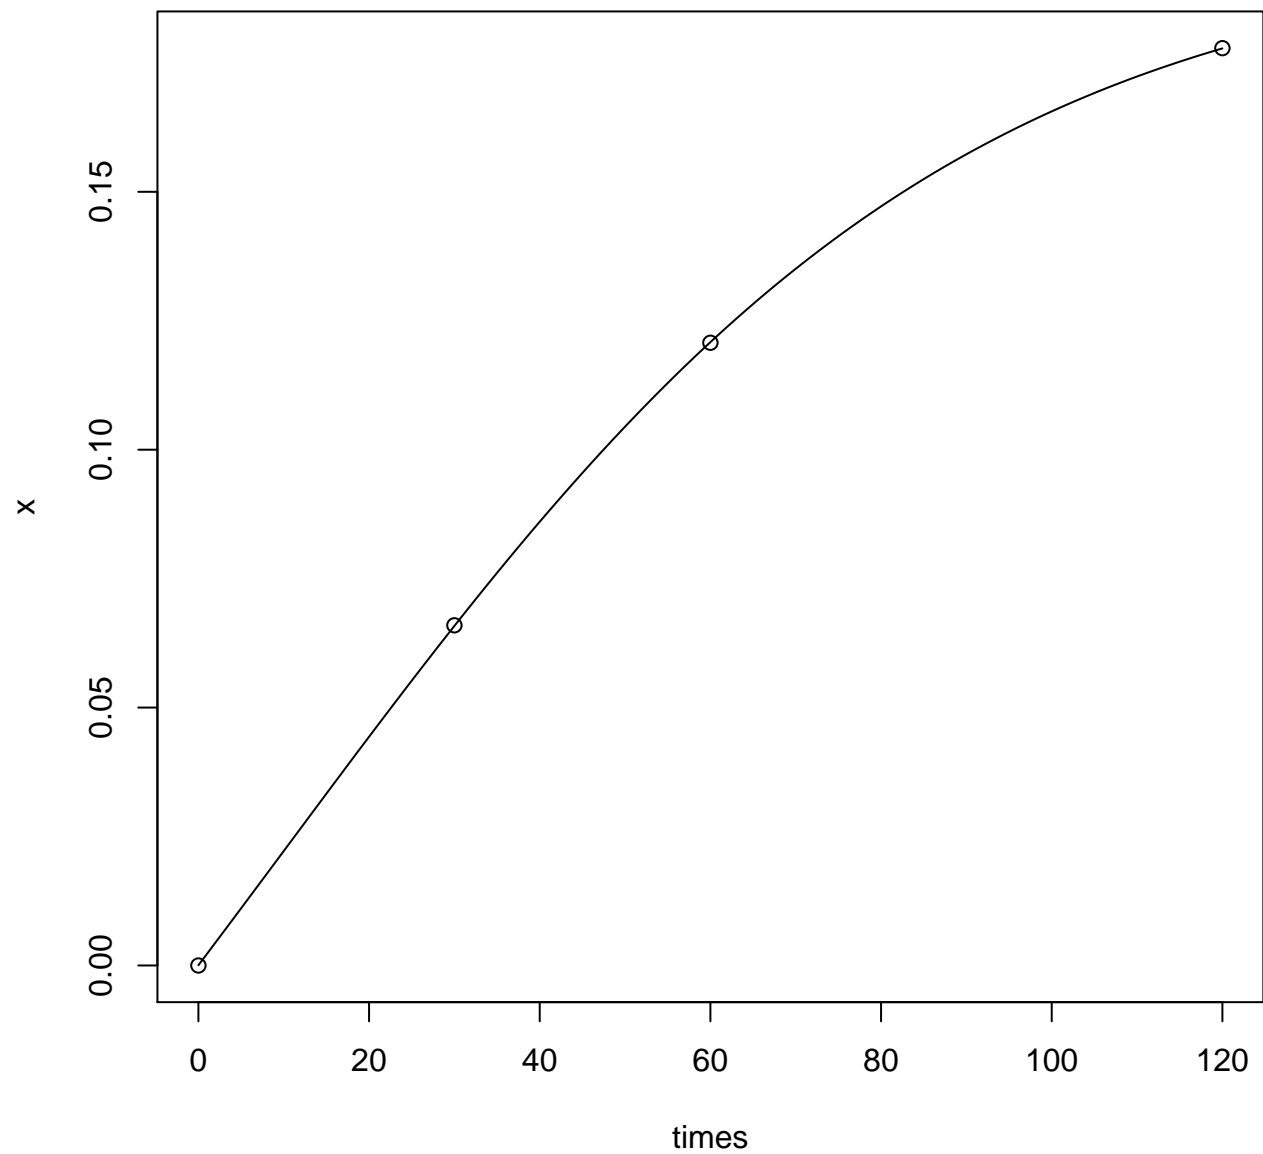

Supplement: s1 [file s1]

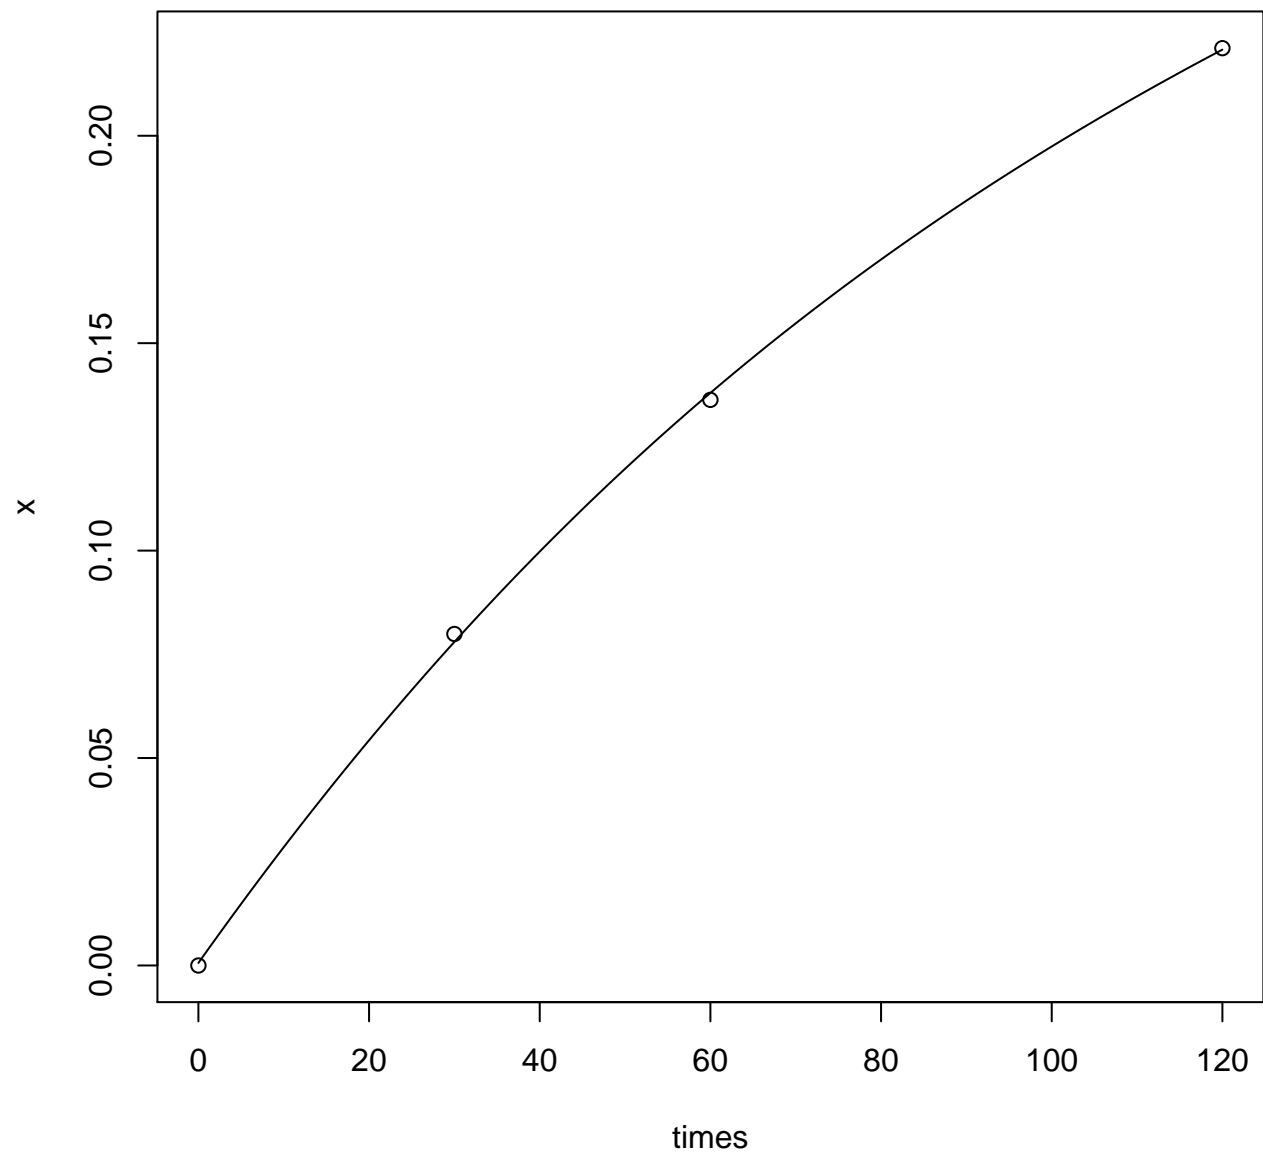

Supplement: s1 [file s1]

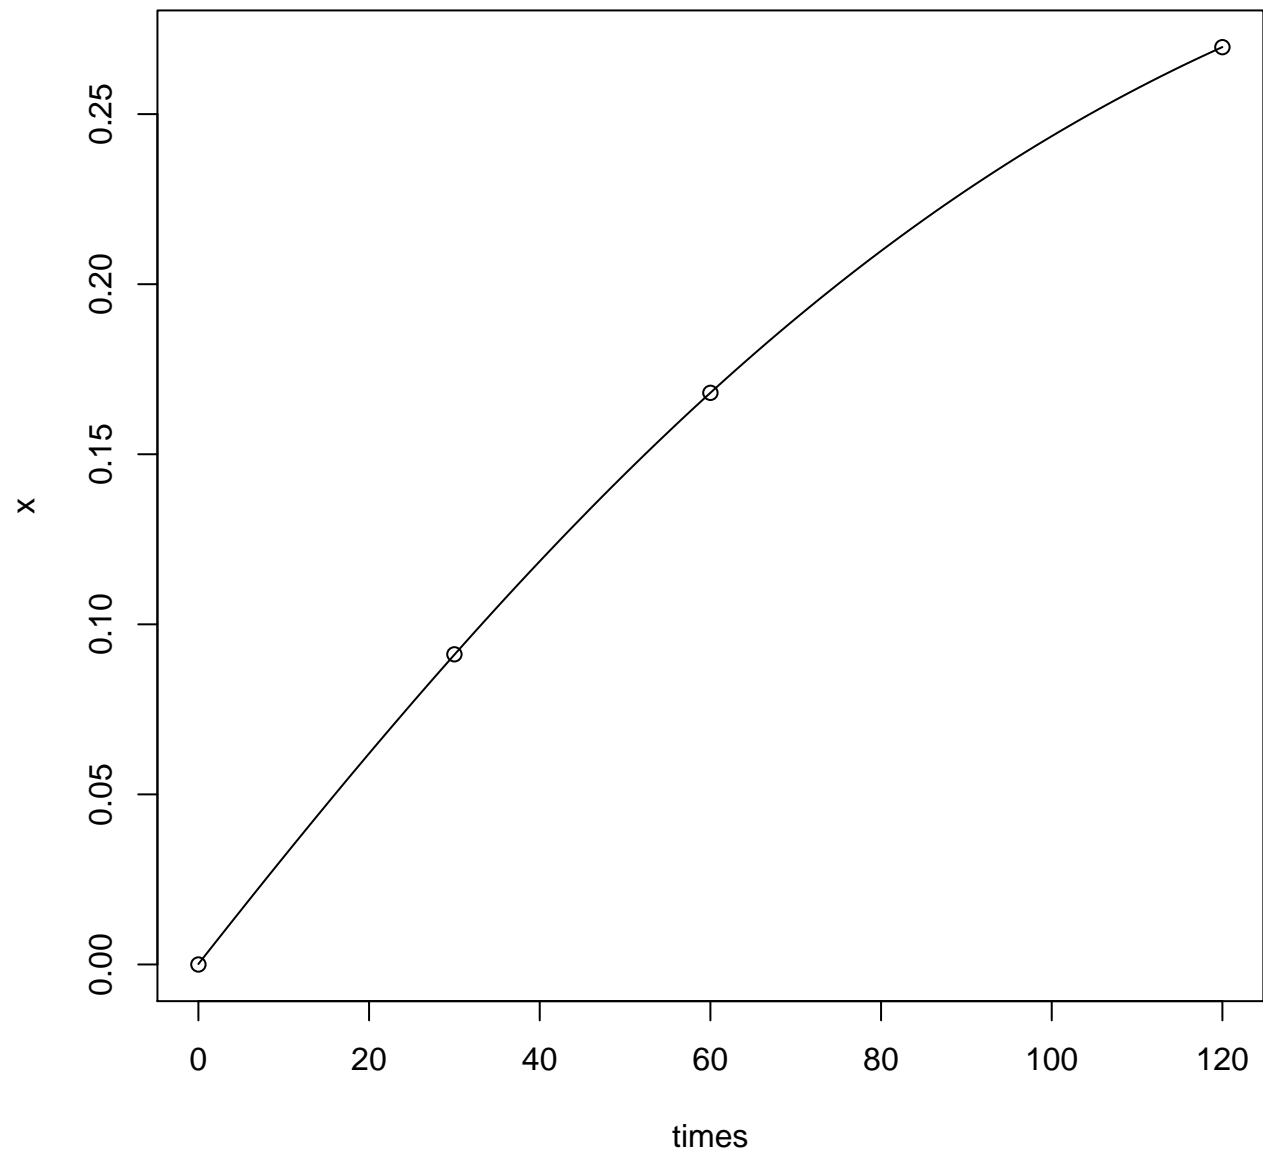

Supplement: s1 [file s1]

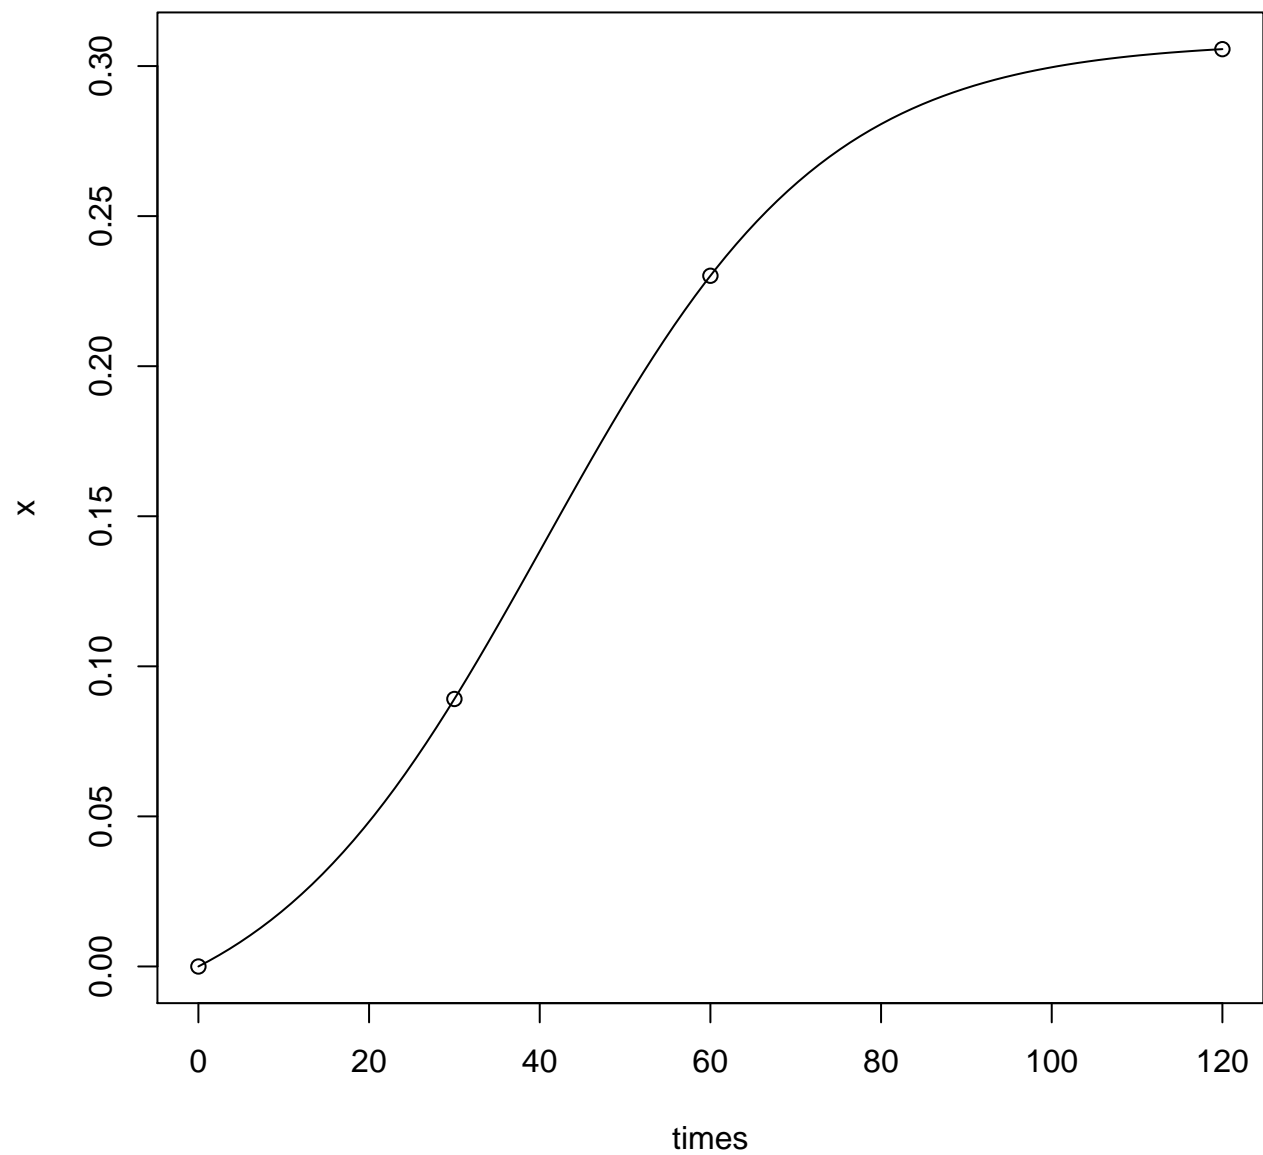

Supplement: s1 [file s1]

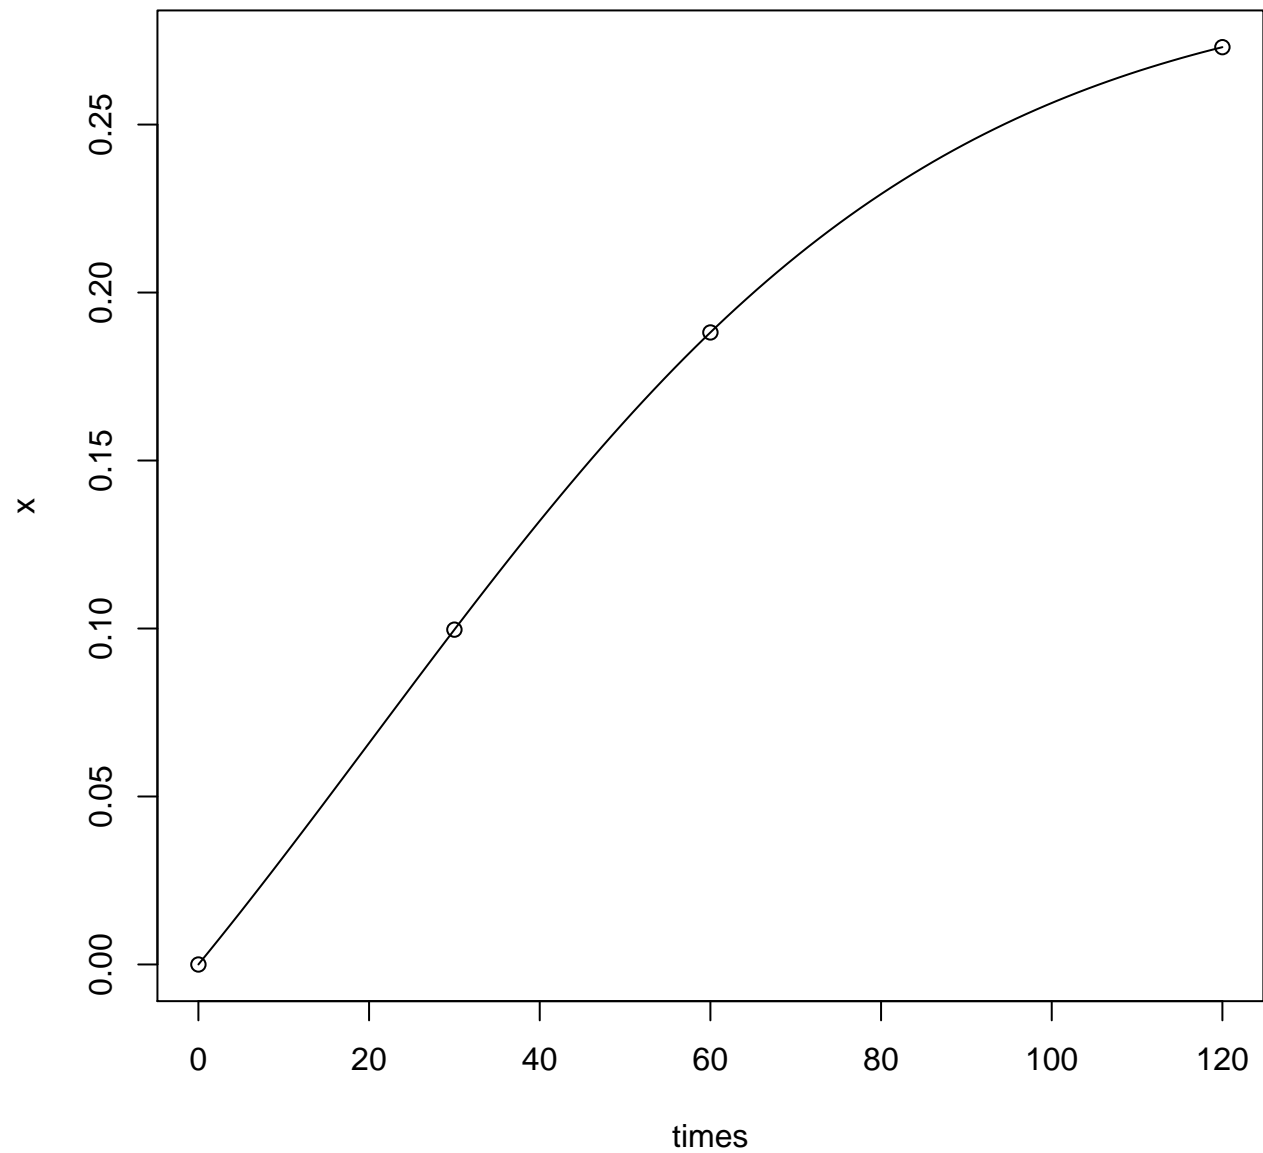

Supplement: s1 [file s1]

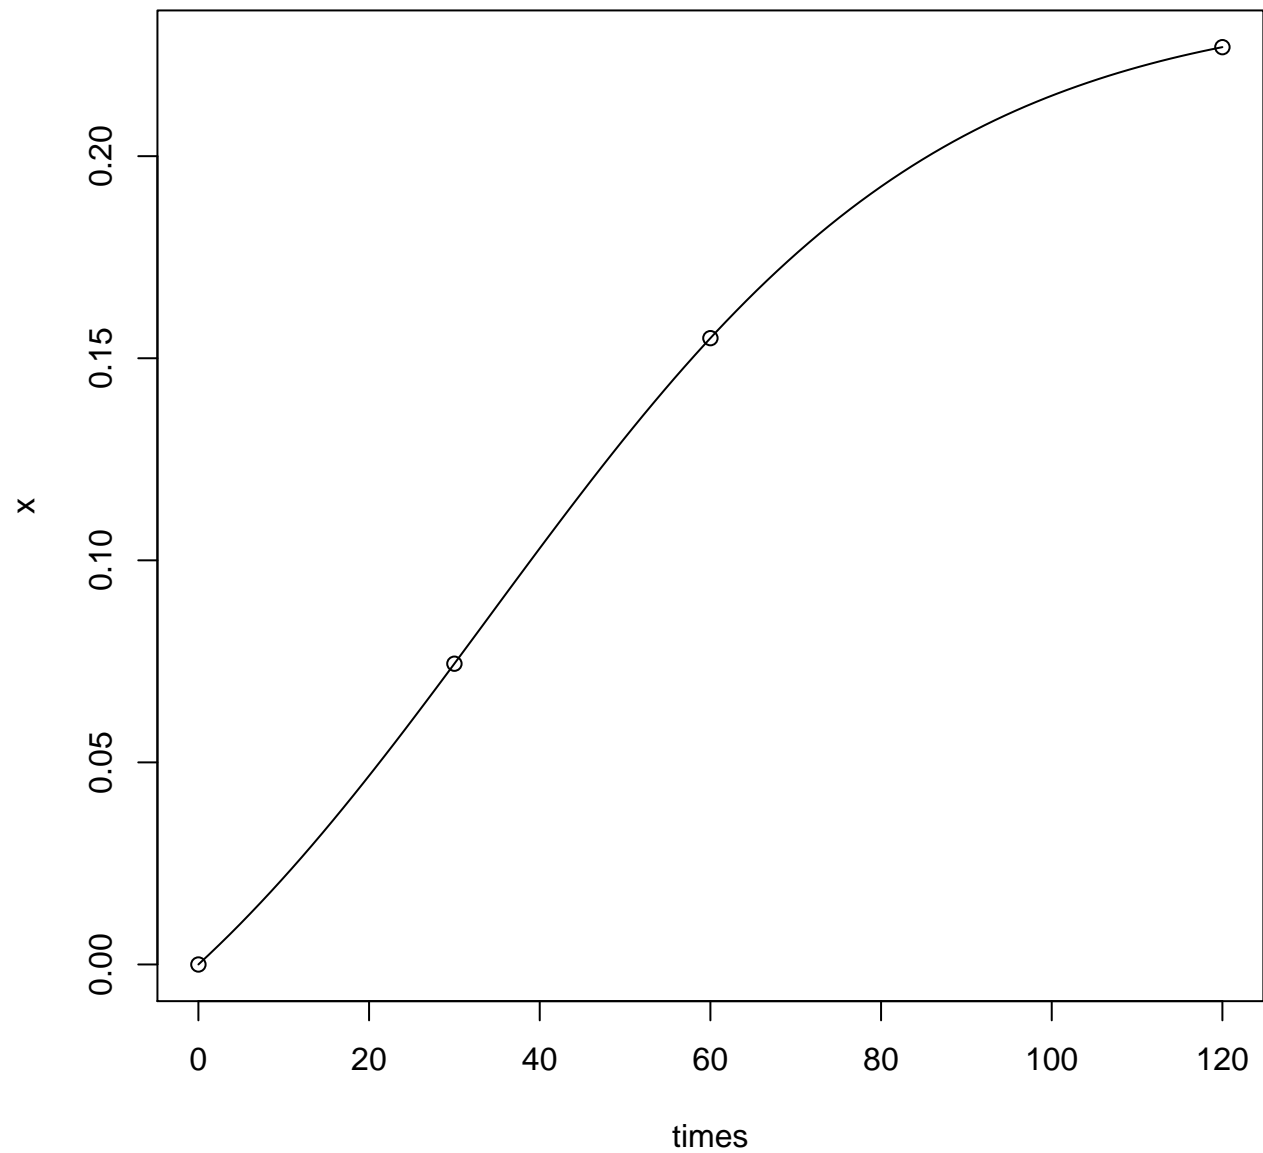

Supplement: s1 [file s1]

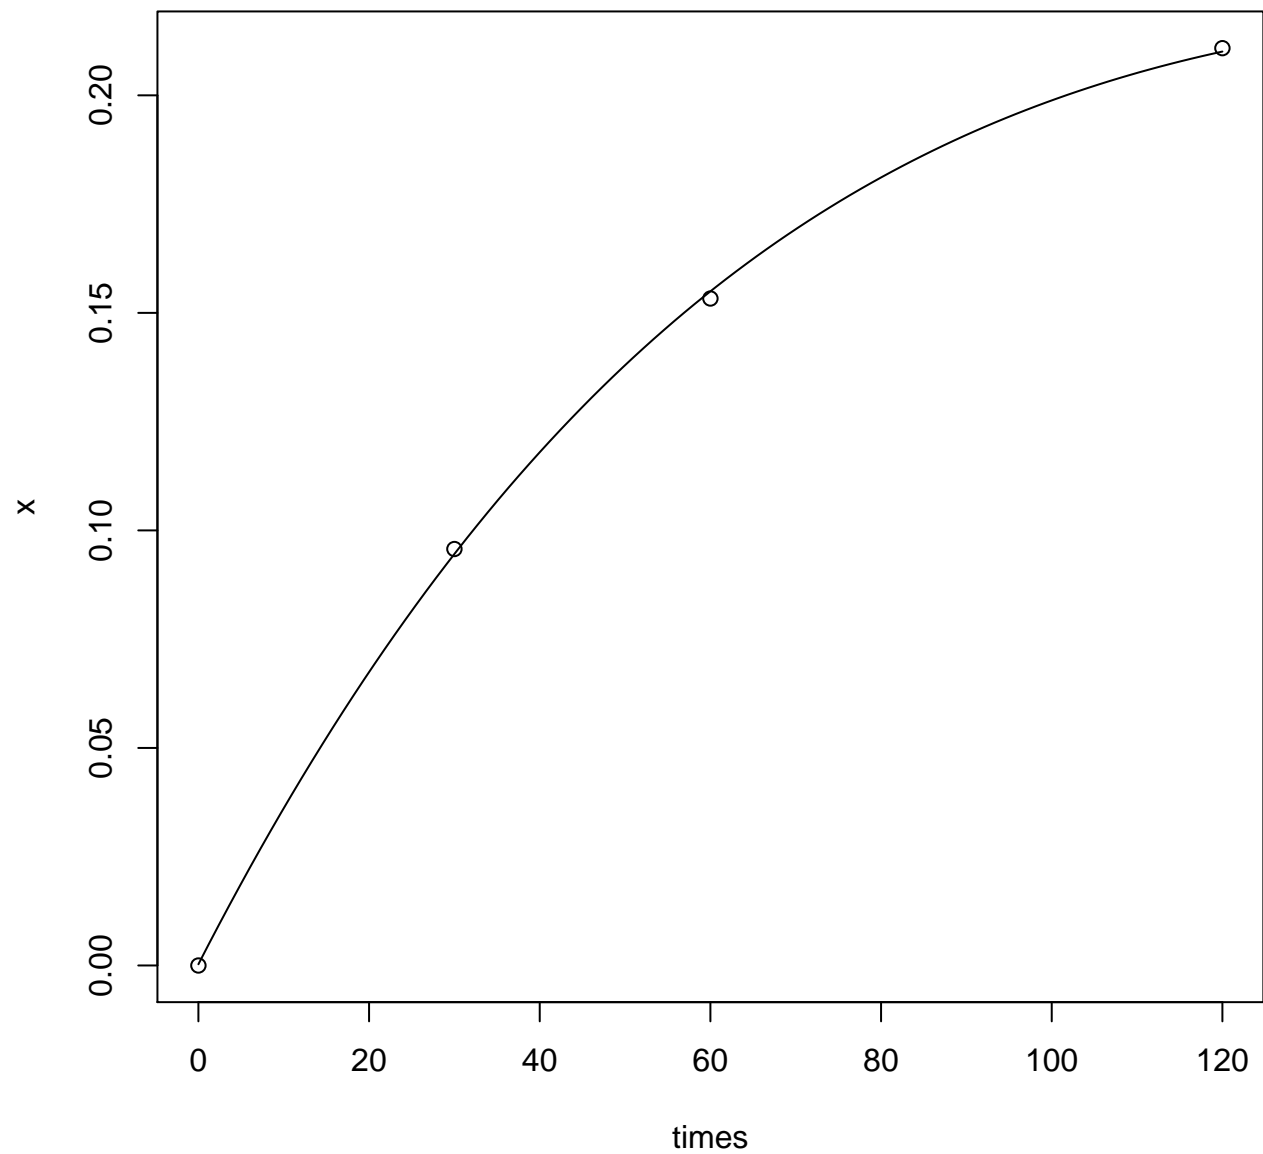

Supplement: s1 [file s1]

## fitting results

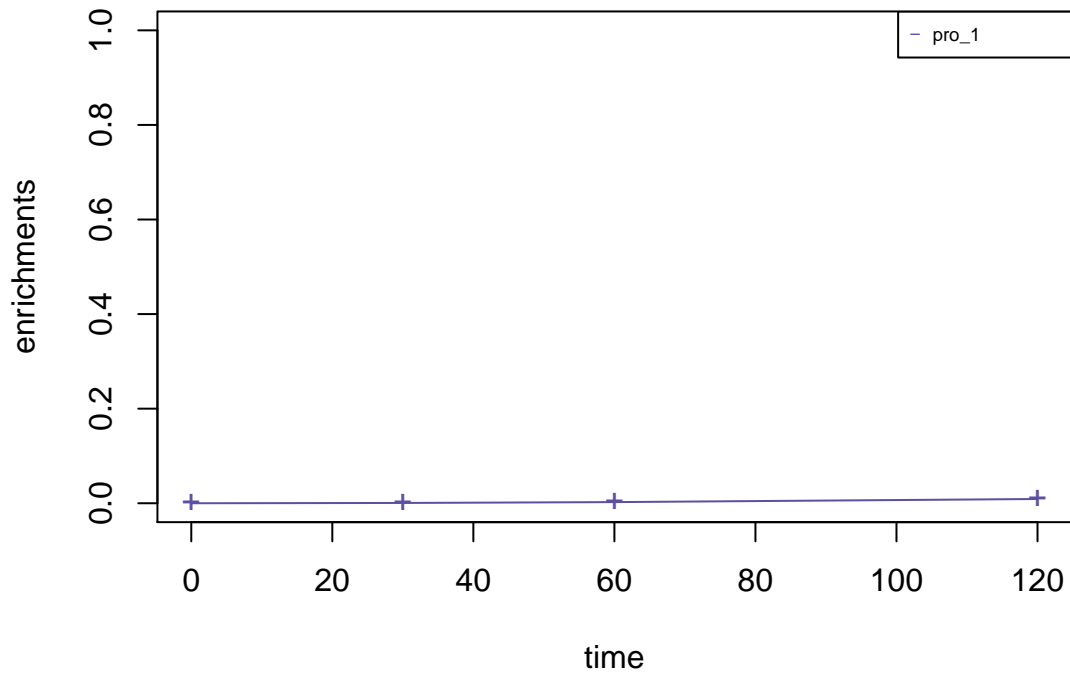

Supplement: s1 [file s1]

## fitting results

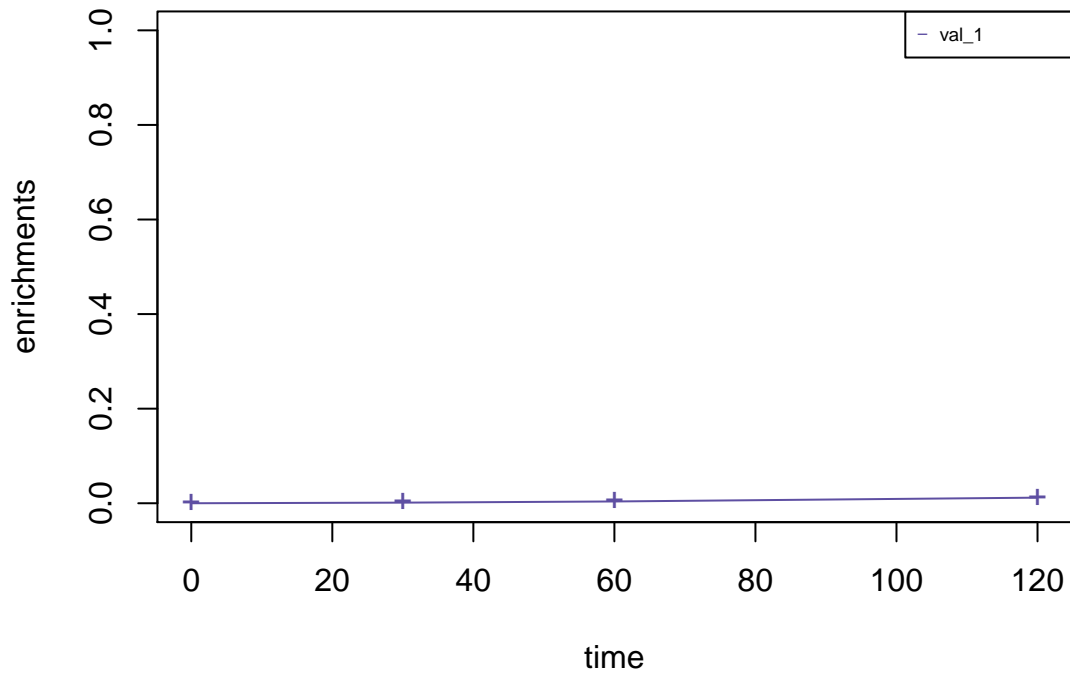

Supplement: s1 [file s1]

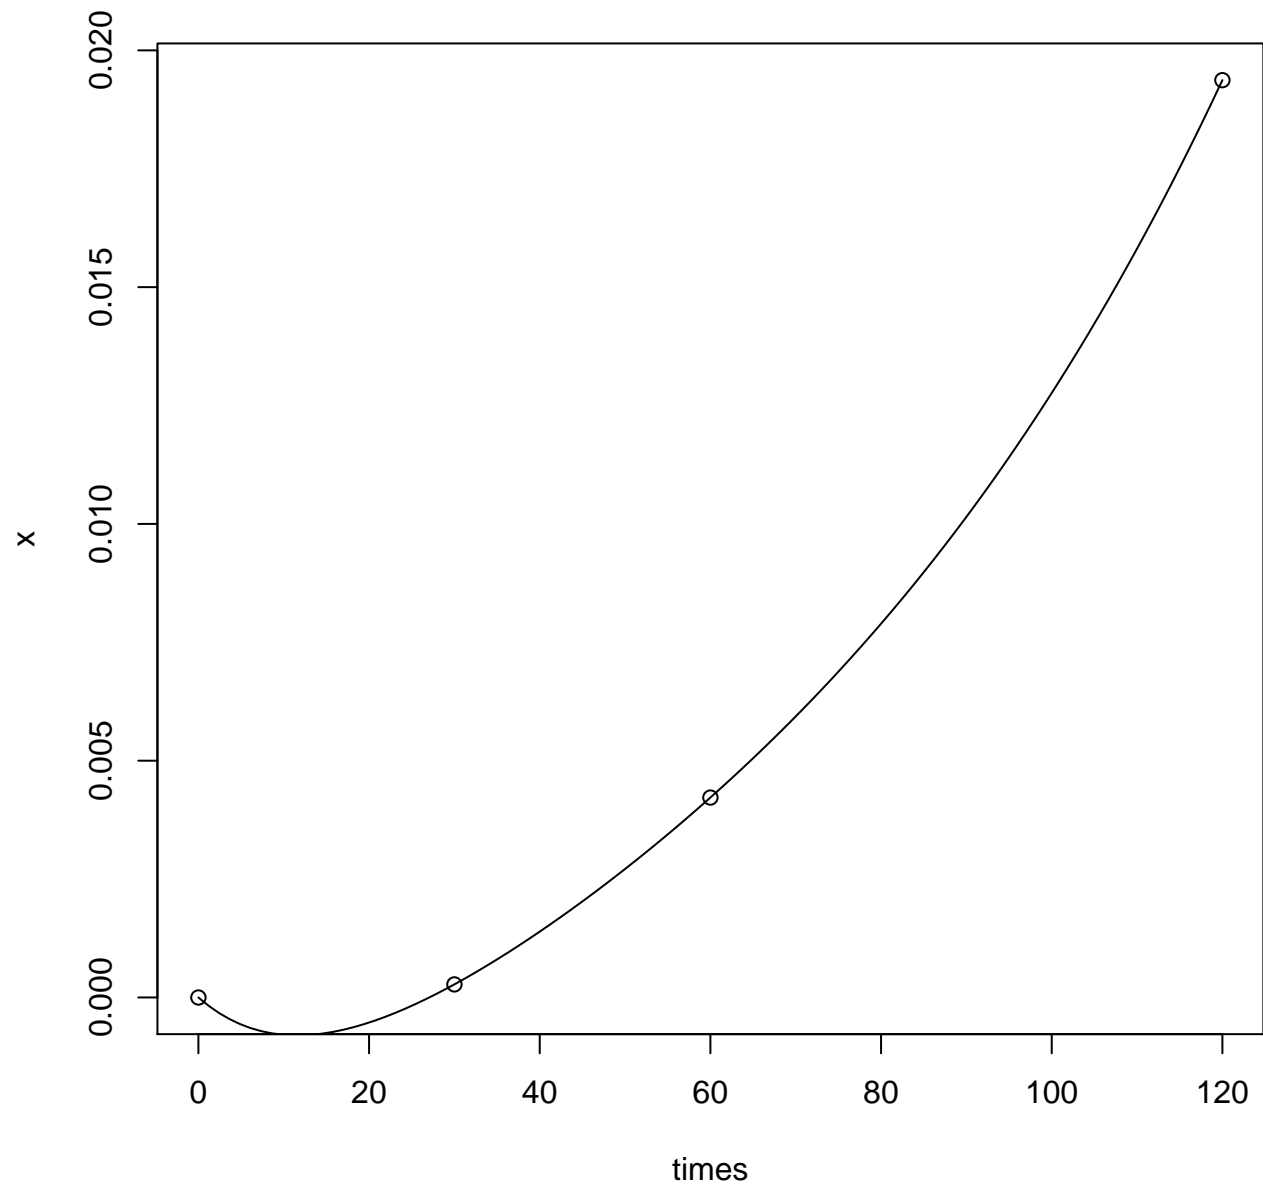

Supplement: s1 [file s1]

## fitting results

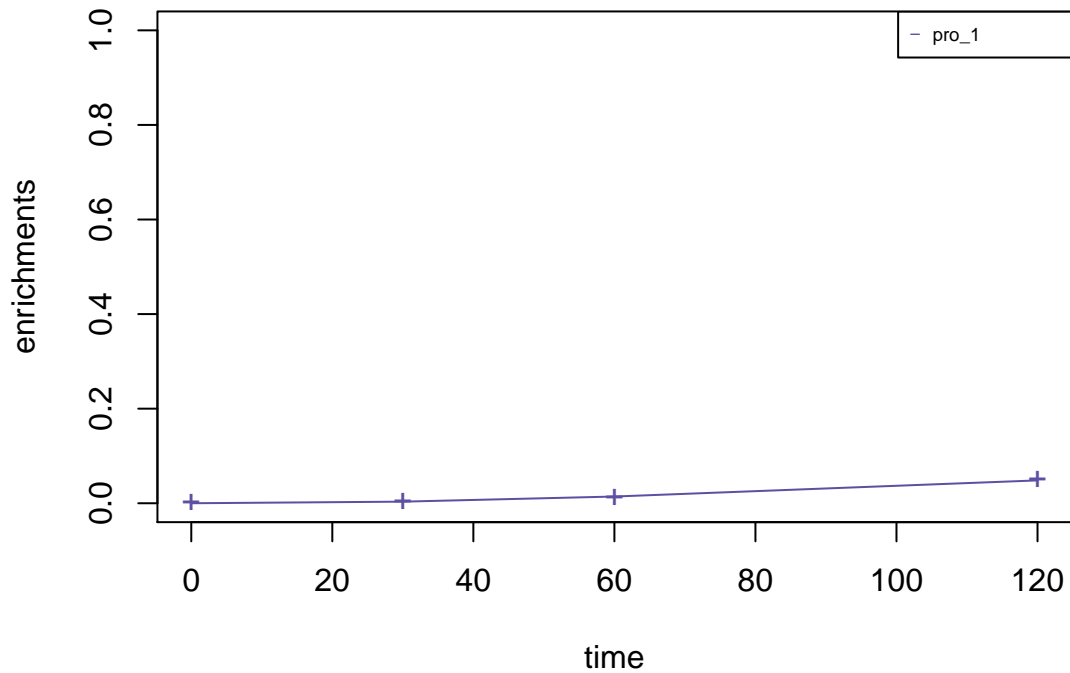

Supplement: s1 [file s1]

## fitting results

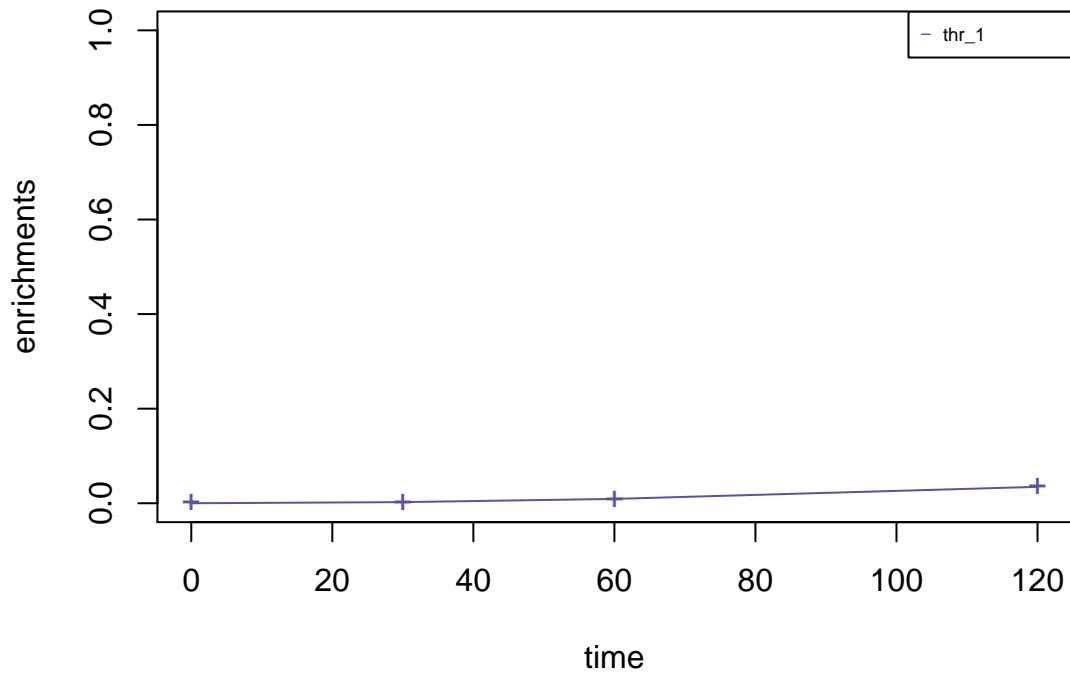

Supplement: s1 [file s1]

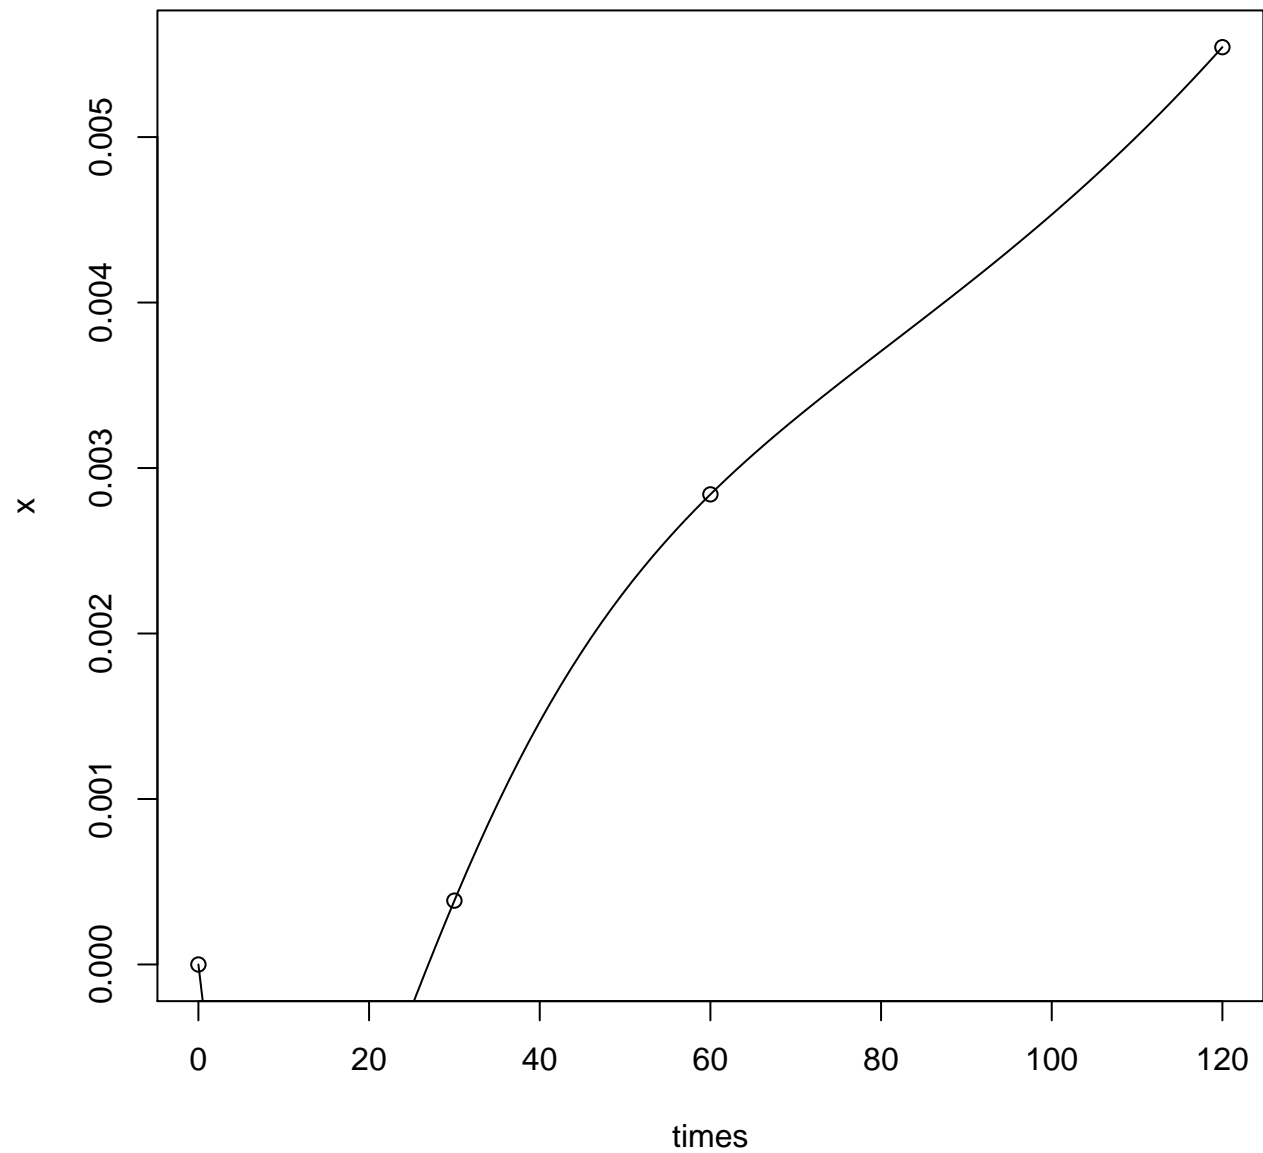

Supplement: s1 [file s1]
